# Supplementary material for: Diastereoselective construction of cyclopent-2-enone-4-ols from aldehydes and 1,2-allenones catalyzed by N-heterocyclic carbene
Source: Royal Society of Chemistry journal article supplement (doi:10.1039/c6cc07974a), 2016-01-01

## Supporting Information

### **Diastereoselective Construction of Cyclopent-2-enone-4-ols from Aldehydes and 1,2-Allenones Catalyzed by *N*-Heterocyclic Carbene**

Dengke Ma, Chunling Fu, and Shengming Ma\*

Laboratory of Molecular Recognition and Synthesis, Department of Chemistry,  
Zhejiang University, Hangzhou 310027, Zhejiang, People's Republic of China

Fax: (+86) 21-55665687

E-mail: [masm@sioc.ac.cn](mailto:masm@sioc.ac.cn)

|                                                                  |         |
|------------------------------------------------------------------|---------|
| General information                                              | S2      |
| Experimental details and analytical data                         | S2-S24  |
| References                                                       | S25     |
| <sup>1</sup> H, <sup>13</sup> C NMR and HPLC spectra of products | S26-S89 |

**General:**  $^1\text{H}$  and  $^{13}\text{C}$  NMR spectra were recorded with a Bruker AM 300 MHz spectrometer. IR spectra were recorded with a Perkin–Elmer 983G instrument. Elemental analyses were measured with a Carlo-Erba EA1110 elementary analysis instrument. Mass spectrometry was performed with an HP 5989A system. High-resolution mass spectrometry was determined with a Finnigan MAT 8430 or Bruker APEXIII instrument. 1-Ethyl-3-methylimidazolium tetrafluoroborate was purchased from J&K.  $\text{Cs}_2\text{CO}_3$  was purchased from Energy Chemical. 1,4-Dioxane and toluene were distilled from Na/benzophenone before use.  $\text{CH}_2\text{Cl}_2$  was distilled from  $\text{CaH}_2$  before use. All liquid aldehydes were freshly distilled before use. Unless otherwise indicated, chemicals and solvents were purchased from commercial suppliers.

1,2-Allenones **2a**,<sup>1</sup> **2b**,<sup>2</sup> **2c**,<sup>3</sup> **2e**,<sup>4</sup> and **2f**,<sup>5</sup> were prepared according to reported literatures.

## Experimental details and analytical data

### 1. Optimization of the reaction conditions.

**Table S1** Reaction exploration<sup>a</sup>

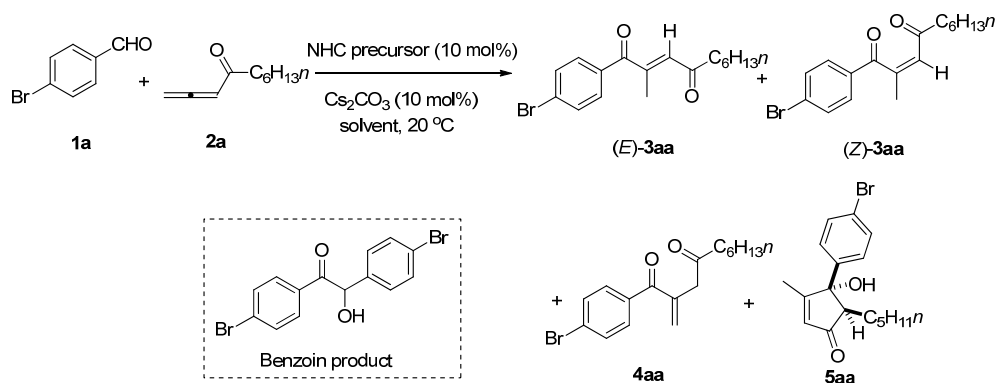

| Entry           | X   | NHC precursor | solvent            | t (h) | Product yield <sup>b</sup> % |                         |            |                 | Recovery of <b>2a</b> <sup>b</sup> % |
|-----------------|-----|---------------|--------------------|-------|------------------------------|-------------------------|------------|-----------------|--------------------------------------|
|                 |     |               |                    |       | <i>(E)</i> - <b>3aa</b>      | <i>(Z)</i> - <b>3aa</b> | <b>4aa</b> | <b>5aa</b>      |                                      |
| 1               | 2   | <b>A1</b>     | toluene            | 22.5  | 37                           | 4                       | 3          | —               | 2                                    |
| 2               | 2   | <b>A2</b>     | toluene            | 22.5  | 38                           | 3                       | 5          | —               | —                                    |
| 3               | 2   | <b>B1</b>     | toluene            | 27.5  | 4                            | —                       | —          | —               | 12                                   |
| 4               | 2   | <b>B2</b>     | toluene            | 27.5  | —                            | —                       | —          | —               | 55                                   |
| 5               | 2   | <b>B3</b>     | toluene            | 8.5   | 18                           | 2                       | 3          | —               | —                                    |
| 6               | 2   | <b>C</b>      | toluene            | 23.5  | —                            | —                       | 1          | —               | 78                                   |
| 7 <sup>c</sup>  | 2   | <b>D</b>      | toluene            | 23.5  | —                            | —                       | —          | —               | 64                                   |
| 8 <sup>d</sup>  | 2   | <b>E</b>      | toluene            | 23.5  | —                            | —                       | 4          | —               | 78                                   |
| 9               | 1.2 | <b>A1</b>     | toluene            | 22.5  | 34                           | 4                       | 2          | 3 <sup>e</sup>  | 24                                   |
| 10              | 1.2 | <b>A1</b>     | dioxane            | 3     | 24                           | 4                       | 5          | 40 <sup>f</sup> | —                                    |
| 11              | 1.2 | <b>A1</b>     | THF                | 27.5  | 29                           | 2                       | 3          | 9 <sup>g</sup>  | 5                                    |
| 12              | 1.2 | <b>A1</b>     | DCM                | 15.5  | 49                           | 6                       | 10         | 12 <sup>h</sup> | —                                    |
| 13 <sup>i</sup> | 1.2 | <b>A1</b>     | DMF                | 21.8  | —                            | —                       | —          | —               | —                                    |
| 14 <sup>i</sup> | 1.2 | <b>A1</b>     | CH <sub>3</sub> CN | 22    | 4                            | —                       | —          | —               | —                                    |
| 15              | 1.2 | <b>A1</b>     | CH <sub>3</sub> OH | 24    | —                            | —                       | —          | —               | —                                    |

<sup>a</sup> Reaction conditions: A solution of NHC precursor and  $\text{Cs}_2\text{CO}_3$  in solvent (1 mL) was stirred at 20 °C for 10 min, then 0.8 mmol of **1a**, 0.4 mmol of **2a**, and solvent (1 mL) were added sequentially. The resulting mixture was then stirred at 20 °C for the time indicated in the Table. <sup>b</sup> Determined by NMR of the crude product using dibromomethane as the internal standard. <sup>c</sup> The Benzooin product was formed in 39% yield. <sup>d</sup> The Benzooin product was formed in 74% yield. <sup>e</sup> Dr was 100:0 as determined by NMR. <sup>f</sup> Dr was 95:5 as determined by NMR. <sup>g</sup> Dr was 88:12 as determined by NMR. <sup>h</sup> Dr was 100:0 as determined by NMR. <sup>i</sup> 20 mol % of  $\text{Cs}_2\text{CO}_3$  was used.

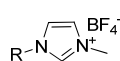

**A1**, R = Et  
**A2**, R = Bu

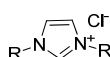

**B1**, R = Mesityl  
**B2**, R = 2,6-diisopropylphenyl  
**B3**, R = isopropyl

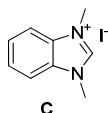

**C**

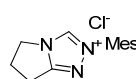

**D**

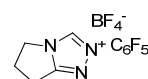

**E**

**Table S2** Exploration of the NHCs in dioxane<sup>a</sup>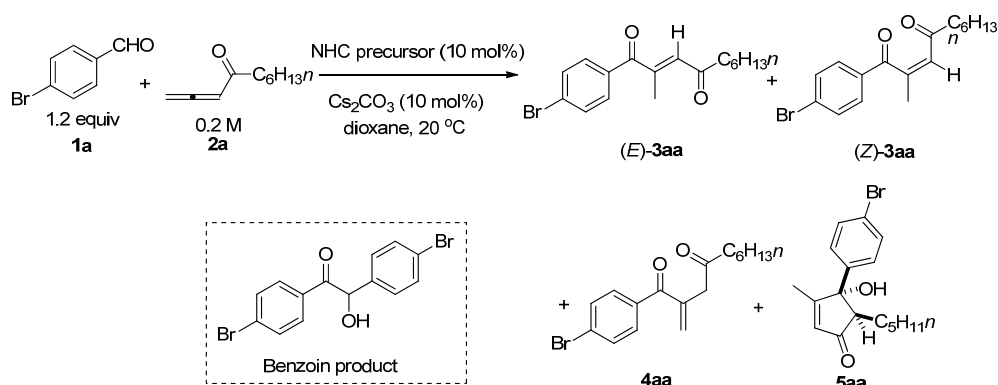

| Entry | NHC precursor | t (h) | Product yield <sup>b</sup> % |                 |            |                 |                  | Recovery of <b>2a</b> <sup>b</sup> % |
|-------|---------------|-------|------------------------------|-----------------|------------|-----------------|------------------|--------------------------------------|
|       |               |       | (E)- <b>3aa</b>              | (Z)- <b>3aa</b> | <b>4aa</b> | <b>5aa</b>      | Benzooin product |                                      |
| 1     | <b>A1</b>     | 3     | 24                           | 4               | 5          | 40 <sup>c</sup> | —                | —                                    |
| 2     | <b>B1</b>     | 23    | 2                            | —               | —          | —               | —                | 15                                   |
| 3     | <b>B2</b>     | 22    | 3                            | —               | —          | —               | —                | 22                                   |
| 4     | <b>B3</b>     | 23.25 | 22                           | —               | —          | —               | —                | 1                                    |
| 5     | <b>C</b>      | 22    | —                            | —               | —          | —               | 21               | 48                                   |
| 6     | <b>D</b>      | 22    | —                            | —               | —          | —               | 36               | 40                                   |
| 7     | <b>E</b>      | 22    | —                            | —               | —          | —               | 85               | 61                                   |
| 8     | <b>F</b>      | 22    | 3                            | —               | —          | —               | 68               | 59                                   |

<sup>a</sup> Reaction conditions: A solution of NHC precursor and Cs<sub>2</sub>CO<sub>3</sub> in dioxane (1 mL) was stirred at 20 °C for 10 min, then 0.48 mmol of **1a**, 0.4 mmol of **2a**, and dioxane (1 mL) were added sequentially. The resulting mixture was then stirred at 20 °C for the time indicated in the Table. <sup>b</sup> Determined by NMR of the crude product using dibromomethane as the internal standard. <sup>c</sup> Dr was 95:5 as determined by NMR.

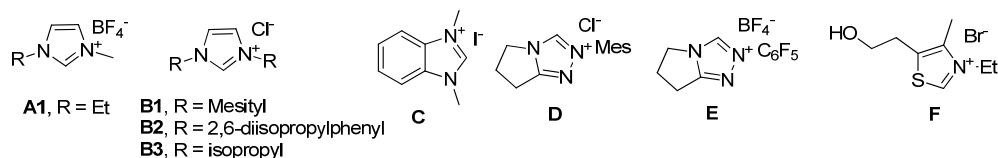

## 2. Preparation of 1,2-allenyl ketones **2d**

### (1) 9-(Benzyloxy)nona-1,2-dien-4-one (**2d**)<sup>6</sup> (mdk-9-109)

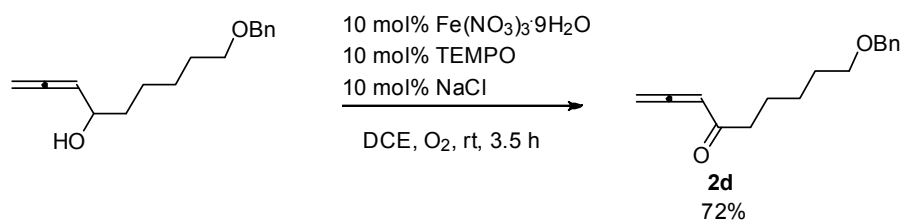

To a Schlenk flask were added Fe(NO<sub>3</sub>)<sub>3</sub>·9H<sub>2</sub>O (124.2 mg, 0.3 mmol), TEMPO (48.0 mg, 0.3 mmol), NaCl (17.8 mg, 0.3 mmol), and DCE (8 mL) with stirring. Then 9-(benzyloxy)nona-1,2-dien-4-ol<sup>7</sup> (741.2 mg, 3 mmol) and DCE (4 mL) were added. The residual air in the reaction system was excluded by oxygen provided by a balloon.

After that, the resulting mixture was stirred at rt under oxygen provided by the balloon. After 3.5 h, the reaction was complete as monitored by TLC. Filtration through a short column of silica gel (eluent: ethyl ether (20 mL×3)), evaporation, and column chromatography on silica gel (petroleum ether (60- 90 °C)/ethyl acetate = 15/1 (480 mL) to 10/1 (440 mL)) afforded **2d** (527.8 mg, 72%) as a liquid: <sup>1</sup>H NMR (300 MHz, CDCl<sub>3</sub>) δ 7.38-7.23 (m, 5H, ArH), 5.77 (t, *J* = 6.5 Hz, 1H, =CH), 5.22 (d, *J* = 6.3 Hz, 2H, =CH<sub>2</sub>), 4.49 (s, 2H, CH<sub>2</sub>), 3.46 (t, *J* = 6.6 Hz, 2H, CH<sub>2</sub>), 2.61 (t, *J* = 7.4 Hz, 2H, CH<sub>2</sub>), 1.69-1.55 (m, 4H, CH<sub>2</sub> × 2), 1.46-1.33 (m, 2H, CH<sub>2</sub>); <sup>13</sup>C NMR (75 MHz, CDCl<sub>3</sub>) δ 216.6, 200.8, 138.5, 128.3, 127.6, 127.5, 96.7, 79.3, 72.9, 70.1, 39.0, 29.5, 25.8, 24.3; IR (neat) ν (cm<sup>-1</sup>) 3087, 3064, 3029, 2988, 2936, 2859, 2793, 1958, 1933, 1682, 1496, 1454, 1409, 1363, 1308, 1204, 1158, 1104, 1028; MS (70 ev, EI) *m/z* (%) 244 (M<sup>+</sup>, 0.43), 91 (100); Elemental analysis calcd (%) for C<sub>16</sub>H<sub>20</sub>O<sub>2</sub>: C, 78.65, H, 8.25; Found: C, 78.44; H, 8.16.

### 3. Preparation of cyclopent-2-enone-4-ols **5aa-5ee**

#### (1) 4-(4-Bromophenyl)-4-hydroxy-3-methyl-5-pentylcyclopent-2-enone (**5aa**)

(mdk-9-019-2)

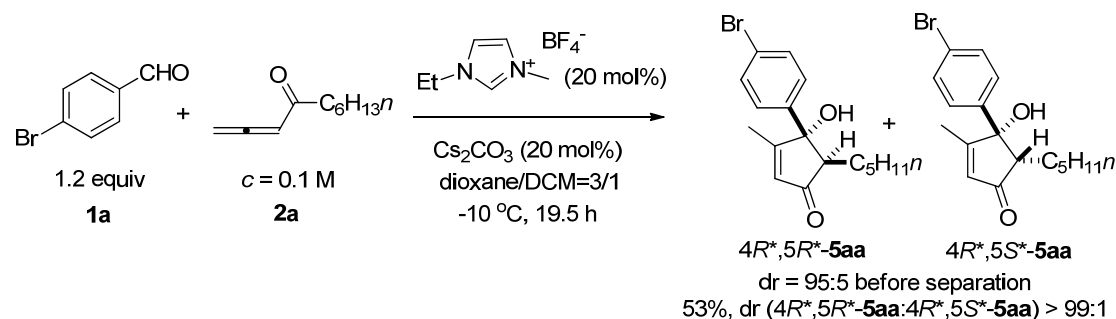

**Typical Procedure I:** To a dry Schlenk flask was added Cs<sub>2</sub>CO<sub>3</sub> (65.1 mg, 0.2 mmol) under N<sub>2</sub>. Then 1-ethyl-3-methylimidazolium tetrafluoroborate (40.3 mg, 0.2 mmol),

dioxane (3.75 mL), and CH<sub>2</sub>Cl<sub>2</sub> (1.25 mL) were added sequentially under N<sub>2</sub>. The resulting mixture was stirred at rt. After 10 min, the mixture was cooled to -10 °C, **1a** (226.8 mg, 1.2 mmol)/CH<sub>2</sub>Cl<sub>2</sub> (1.25 mL) and **2a** (152.3 mg, 1 mmol)/dioxane (3.75 mL) were added sequentially. The resulting mixture was stirred at -10 °C. After 19.5 h, the reaction was complete as monitored by TLC. Filtration through a short column of silica gel (eluent: ethyl acetate (20 mL×3)), evaporation, and column chromatography on silica gel (petroleum ether (30 °C ~ 60 °C, redistillation)/ethyl acetate = 10/1 (440 mL) to 5/1 (480 mL × 2) to 3/1 (400 mL)) afforded **5aa** (0.1796 g, 53%, dr > 99:1) (the dr of the crude product was 95:5 as determined via the NMR analysis) as a liquid: <sup>1</sup>H NMR (300 MHz, CDCl<sub>3</sub>) δ 7.47 (d, *J* = 8.7 Hz, 2H, ArH), 7.13 (brs, 2H, ArH), 6.13 (q, *J* = 1.3 Hz, 1H, =CH), 2.72 (s, 1H, OH), 2.58 (dd, *J*<sub>1</sub> = 9.0 Hz, *J*<sub>2</sub> = 5.4 Hz, 1H, CH), 1.90 (d, *J* = 1.5 Hz, 3H, CH<sub>3</sub>), 1.59-1.46 (m, 1H, one proton from CH<sub>2</sub>), 1.40-0.94 (m, 6H, CH<sub>2</sub> × 3), 0.89-0.72 (m, 4H, CH<sub>3</sub> + one proton from CH<sub>2</sub>); <sup>13</sup>C NMR (75 MHz, CDCl<sub>3</sub>) δ 206.1, 176.1, 138.4, 131.3, 130.1, 127.5, 121.6, 85.2, 61.4, 31.6, 27.1, 25.9, 22.1, 13.9, 13.6; IR (neat) ν (cm<sup>-1</sup>) 3435, 2954, 2930, 2859, 1693, 1625, 1589, 1572, 1487, 1466, 1456, 1434, 1397, 1375, 1307, 1297, 1245, 1232, 1205, 1164, 1075, 1010; MS (70 ev, EI) *m/z* (%) 338 (M<sup>+</sup>(<sup>81</sup>Br), 4.15), 336 (M<sup>+</sup>(<sup>79</sup>Br), 4.56), 265 (100); HRMS calcd for C<sub>17</sub>H<sub>21</sub><sup>79</sup>BrO<sub>2</sub> (M<sup>+</sup>): 336.0725, found: 336.0728.

The following compounds were prepared according to **Typical procedure I**.

**(2) 4-Hydroxy-3-methyl-5-pentyl-4-phenylcyclopent-2-enone (5ba) (mdk-8-065)**

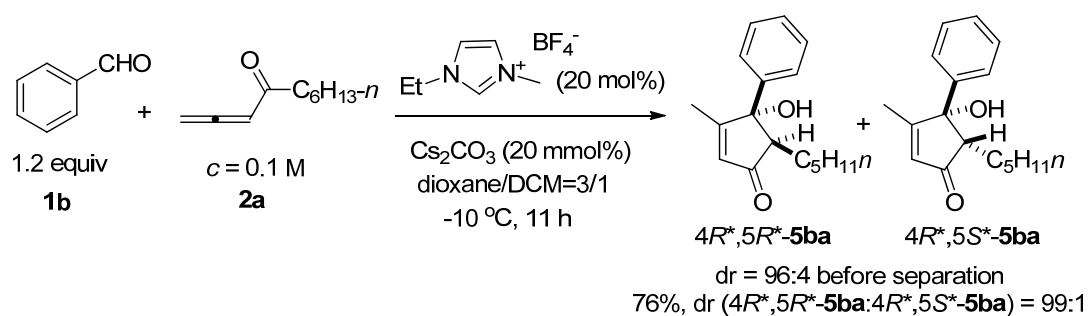

The reaction of **1b** (127.4 mg, 1.2 mmol), **2a** (153.0 mg, 1 mmol), 1-ethyl-3-methylimidazolium tetrafluoroborate (40.0 mg, 0.2 mmol), and  $\text{Cs}_2\text{CO}_3$  (65.3 mg, 0.2 mmol) in dioxane (7.5 mL) and dichloromethane (2.5 mL) at  $-10\text{ }^\circ\text{C}$  for 11 h afforded **5ba** (0.1966 g, 76%, dr = 99:1) (petroleum ether ( $60\text{ }^\circ\text{C} \sim 90\text{ }^\circ\text{C}$ , redistillation)/ethyl acetate = 10/1 (440 mL) to 5/1 (480 mL) to 3/1 (400 mL)) (the dr of the crude product was 96:4 as determined via the NMR analysis) as a liquid:  $^1\text{H}$  NMR (300 MHz,  $\text{CDCl}_3$ )  $\delta$  7.51-6.97 (m, 5H, ArH), 6.14 (q,  $J = 1.3$  Hz, 1H, =CH), 2.81 (s, 1H, OH), 2.60 (dd,  $J_1 = 9.2$  Hz,  $J_2 = 5.3$  Hz, 1H, CH), 1.91 (d,  $J = 1.5$  Hz, 3H,  $\text{CH}_3$ ), 1.59-1.45 (m, 1H, one proton from  $\text{CH}_2$ ), 1.38-0.91 (m, 6H,  $\text{CH}_2 \times 3$ ), 0.90-0.78 (m, 1H, one proton from  $\text{CH}_2$ ), 0.75 (t,  $J = 6.8$  Hz, 3H,  $\text{CH}_3$ );  $^{13}\text{C}$  NMR (75 MHz,  $\text{CDCl}_3$ )  $\delta$  206.3, 176.1, 139.2, 130.1, 128.2, 127.5, 125.5, 85.6, 61.4, 31.7, 27.1, 25.8, 22.1, 13.9, 13.7; IR (neat)  $\nu$  ( $\text{cm}^{-1}$ ) 3439, 3087, 3060, 3028, 2955, 2930, 2859, 1693, 1626, 1601, 1491, 1448, 1374, 1301, 1246, 1232, 1205, 1165, 1131, 1093, 1066, 1015; MS (70 ev, EI)  $m/z$  (%) 258 ( $\text{M}^+$ , 14.47), 187 (100); Elemental analysis calcd (%) for  $\text{C}_{17}\text{H}_{22}\text{O}_2$ : C, 79.03; H, 8.58; Found: C, 79.00; H, 8.81.

**(3) 4-Hydroxy-3-methyl-4-phenyl-5-propylcyclopent-2-enone (5bb) (mdk-8-080)**

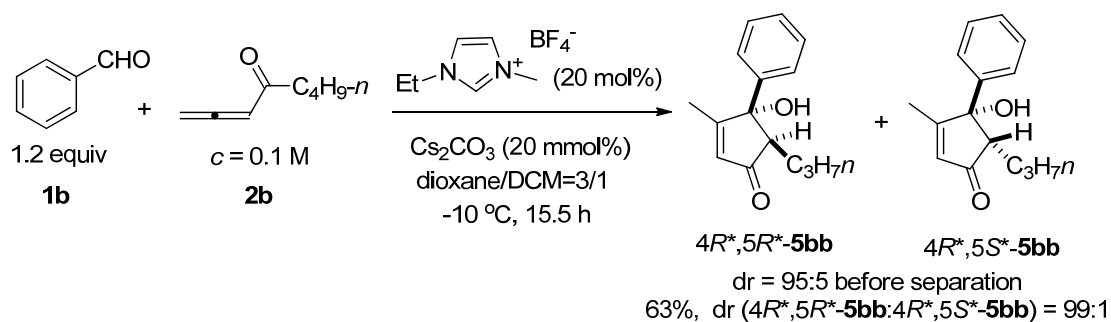

The reaction of **1b** (127.6 mg, 1.2 mmol), **2b** (124.3 mg, 1 mmol), 1-ethyl-3-methylimidazolium tetrafluoroborate (39.9 mg, 0.2 mmol), and  $\text{Cs}_2\text{CO}_3$  (65.1 mg, 0.2 mmol) in dioxane (7.5 mL) and dichloromethane (2.5 mL) at  $-10\text{ }^\circ\text{C}$  for 15.5 h afforded **5bb** (0.1461 g, 63%, dr = 99:1) (petroleum ether ( $30\text{ }^\circ\text{C} \sim 60\text{ }^\circ\text{C}$ )/ethyl acetate = 10/1 (440 mL) to 5/1 ( $480\text{ mL} \times 2 + 180\text{ mL}$ ) to 3/1 (400 mL)) (the dr of the crude product was 95:5 as determined via the NMR analysis) as a liquid (solid, m. p.  $79\sim 81\text{ }^\circ\text{C}$  (EtOH)):  $^1\text{H}$  NMR (300 MHz,  $\text{CDCl}_3$ )  $\delta$  7.47-6.99 (m, 5H, ArH), 6.13 (q,  $J = 1.4\text{ Hz}$ , 1H, =CH), 3.18 (s, 1H, OH), 2.64 (dd,  $J_1 = 8.7\text{ Hz}$ ,  $J_2 = 5.4\text{ Hz}$ , 1H, CH), 1.91 (d,  $J = 1.5\text{ Hz}$ , 3H,  $\text{CH}_3$ ), 1.55-1.39 (m, 1H, one proton from  $\text{CH}_2$ ), 1.39-1.14 (m, 2H,  $\text{CH}_2$ ), 0.89-0.75 (m, 1H, one proton from  $\text{CH}_2$ ), 0.69 (t,  $J = 7.4\text{ Hz}$ , 3H,  $\text{CH}_3$ );  $^{13}\text{C}$  NMR (75 MHz,  $\text{CDCl}_3$ )  $\delta$  206.7, 176.6, 139.3, 129.9, 128.2, 127.5, 125.5, 85.5, 61.1, 28.1, 20.8, 13.9, 13.7; IR (neat)  $\nu$  ( $\text{cm}^{-1}$ ) 3435, 3087, 3060, 3028, 2958, 2933, 2871, 1694, 1626, 1601, 1491, 1465, 1448, 1375, 1319, 1301, 1249, 1220, 1194, 1170, 1131, 1096, 1066, 1034, 1002; MS (70 ev, EI)  $m/z$  (%) 230 ( $\text{M}^+$ , 9.35), 187 (100); HRMS calcd for  $\text{C}_{15}\text{H}_{18}\text{O}_2$  ( $\text{M}^+$ ): 230.1307, found: 230.1310.

**(4) 5-Benzyl-4-hydroxy-3-methyl-4-phenylcyclopent-2-enone (5bc) (mdk-8-098)**



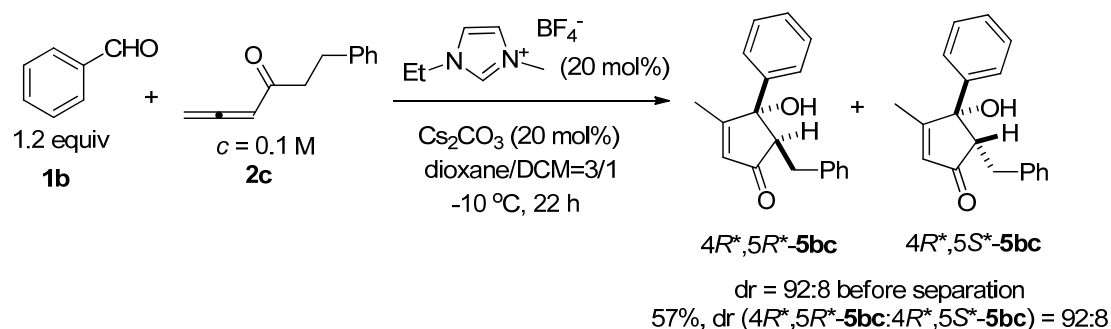

The reaction of **1b** (127.8 mg, 1.2 mmol), **2c** (173.0 mg, 1 mmol), 1-ethyl-3-methylimidazolium tetrafluoroborate (40.1 mg, 0.2 mmol), and Cs<sub>2</sub>CO<sub>3</sub> (65.1 mg, 0.2 mmol) in dioxane (7.5 mL) and dichloromethane (2.5 mL) at -10 °C for 22 h afforded **5bc** (0.1598 g, 57%, dr = 92:8) (petroleum ether (30 °C ~ 60 °C)/ethyl acetate = 10/1 (440 mL) to 5/1 (480 mL) to 3/1 (600 mL)) (the dr of the crude product was 92:8 as determined via the NMR analysis) as a liquid: <sup>1</sup>H NMR (300 MHz, CDCl<sub>3</sub>) δ 7.37-7.26 (m, 3H, ArH), 7.25-6.97 (m, 5H, ArH), 6.81-6.70 (m, 2H, ArH), [6.14 (q, *J* = 1.3 Hz, 0.92H), 6.12 (q, *J* = 1.2 Hz, 0.08H), 1H, =CH], 3.27-3.04 (m, 2H, CH<sub>2</sub>), [2.42 (s, 0.08H), 2.30 (s, 0.83H), 1H, OH], 2.26-2.14 (m, 1H, CH), 1.90-1.82 (m, 3H, CH<sub>3</sub>); IR (neat) ν (cm<sup>-1</sup>) 3418, 3086, 3061, 3028, 2948, 2916, 2855, 1694, 1625, 1602, 1496, 1448, 1434, 1374, 1304, 1243, 1211, 1162, 1088, 1065, 1014; MS (70 ev, EI) *m/z* (%) 278 (M<sup>+</sup>, 57.11), 187 (100); Elemental analysis calcd (%) for C<sub>19</sub>H<sub>18</sub>O<sub>2</sub>: C, 81.99, H, 6.52; Found: C, 81.69; H, 6.47.

**(5) 5-(4-(Benzyloxy)butyl)-4-hydroxy-3-methyl-4-phenylcyclopent-2-enone (5bd)**

**(mdk-9-110)**

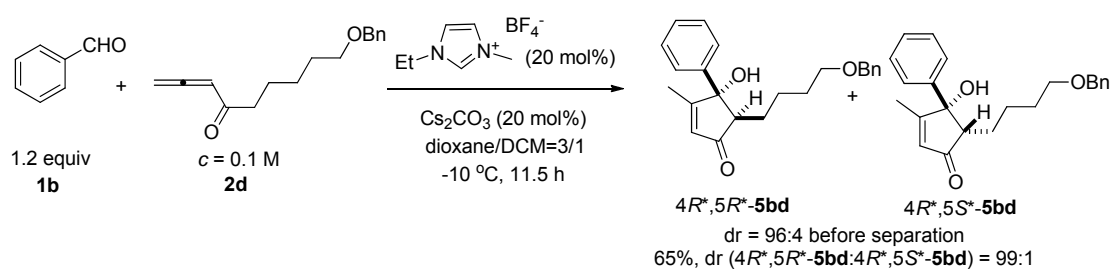

The reaction of **1b** (128.0 mg, 1.2 mmol), **2d** (244.3 mg, 1 mmol), 1-ethyl-3-methylimidazolium tetrafluoroborate (40.3 mg, 0.2 mmol), and Cs<sub>2</sub>CO<sub>3</sub> (65.1 mg, 0.2 mmol) in dioxane (7.5 mL) and dichloromethane (2.5 mL) at -10 °C for 11.5 h afforded **5bd** (0.2337 g, 65%, purity= 98%, dr = 99:1) (petroleum ether (60 °C ~ 90 °C)/ethyl acetate = 10/1 (440 mL) to 5/1 (420 mL + 600 mL) to 3/1 (400 mL)) (the dr of the crude product was 96:4 as determined via the NMR analysis) as a liquid: <sup>1</sup>H NMR (300 MHz, CDCl<sub>3</sub>) δ 7.43-6.99 (m, 10H, ArH), 6.11 (q, *J* = 1.4 Hz, 1H, =CH), 4.42 (s, 2H, CH<sub>2</sub>), 3.49-3.16 (m, 3H, OH + CH<sub>2</sub>), 2.65 (dd, *J*<sub>1</sub> = 9.0 Hz, *J*<sub>2</sub> = 5.1 Hz, 1H, CH), 1.87 (d, *J* = 1.2 Hz, 3H, CH<sub>3</sub>), 1.63-1.19 (m, 5H, CH<sub>2</sub> × 2 + one proton from CH<sub>2</sub>), 1.01-0.82 (m, 1H, one proton from CH<sub>2</sub>); <sup>13</sup>C NMR (75 MHz, CDCl<sub>3</sub>) δ 206.5, 176.8, 139.3, 138.2, 129.6, 128.2, 128.1, 127.6, 127.44, 127.36, 125.5, 85.1, 72.6, 69.9, 60.9, 28.9, 25.4, 23.7, 13.6; IR (neat) ν (cm<sup>-1</sup>) 3439, 3086, 3061, 3029, 2938, 2862, 2793, 1694, 1626, 1601, 1492, 1448, 1372, 1301, 1240, 1203, 1162, 1097, 1068, 1028; MS (70 ev, EI) *m/z* (%) 350 (M<sup>+</sup>, 3.28), 91 (100); HRMS calcd for C<sub>23</sub>H<sub>26</sub>O<sub>3</sub> (M<sup>+</sup>): 350.1882, found: 350.1878.

**(6) (4*R*\*,5*S*\*)-4-(4-Phenylphenyl)-4-hydroxy-3-methyl-5-pentylcyclopent-2-enone (4*R*\*,5*S*\*-5ca) (mdk-8-068-1) and (4*R*\*,5*R*\*)-4-(4-Phenylphenyl)-4-hydroxy-3-methyl-5-pentylcyclopent-2-enone (4*R*\*,5*R*\*-5ca) (mdk-8-068-2)**

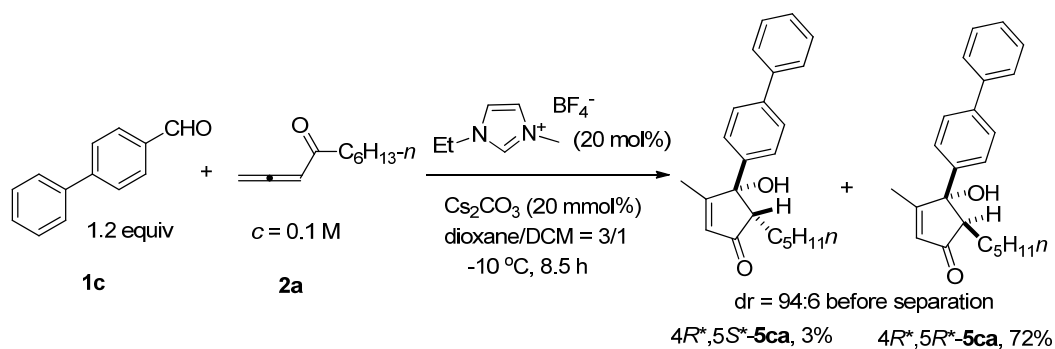

The reaction of **1c** (225.5 mg, 1.2 mmol), **2a** (152.9 mg, 1 mmol), 1-ethyl-3-methylimidazolium tetrafluoroborate (40.0 mg, 0.2 mmol), and Cs<sub>2</sub>CO<sub>3</sub> (65.5 mg, 0.2 mmol) in dioxane (7.5 mL) and dichloromethane (2.5 mL) at -10 °C for 8.5 h afforded impure 4*R*\*,5*S*\*-**5ca** (18.4 mg) and pure 4*R*\*,5*R*\*-**5ca** (241.0 mg, 72%) (petroleum ether (30 °C ~ 60 °C)/ethyl acetate = 10/1 (440 mL + 400 mL) to 5/1 (480 mL + 200 mL) to 3/1 (400 mL)) (the dr of the crude product was 94:6 as determined via the NMR analysis). Further purification of the impure 4*R*\*,5*S*\*-**5ca** by column chromatography on silica gel afforded pure 4*R*\*,5*S*\*-**5ca** (8.9 mg, 3%) (DCM (400 mL)).

4*R*\*,5*S*\*-**5ca**, minor, the less polar isomer, liquid: <sup>1</sup>H NMR (300 MHz, CDCl<sub>3</sub>) δ 7.62-7.57 (m, 4H, ArH), 7.49-7.34 (m, 5H, ArH), 6.10 (q, *J* = 1.3 Hz, 1H, =CH), 2.61 (dd, *J*<sub>1</sub> = 8.7 Hz, *J*<sub>2</sub> = 5.7 Hz, 1H, CH), 2.01 (s, 1H, OH), 1.92 (d, *J* = 1.5 Hz, 3H, CH<sub>3</sub>), 1.83-1.59 (m, 2H, CH<sub>2</sub>), 1.51-1.32 (m, 2H, CH<sub>2</sub>), 1.31-1.14 (m, 4H, CH<sub>2</sub> × 2), 0.81 (t, *J* = 6.9 Hz, 3H, CH<sub>3</sub>); <sup>13</sup>C NMR (75 MHz, CDCl<sub>3</sub>) δ 208.6, 177.2, 142.4, 140.4, 140.1, 130.5, 128.8, 127.4, 127.3, 127.0, 125.0, 82.8, 59.7, 31.8, 27.3, 26.8, 22.3, 14.1, 14.0; IR (neat) ν (cm<sup>-1</sup>) 3444, 3057, 3029, 2954, 2927, 2857, 1694, 1626, 1600, 1486, 1435, 1405, 1374, 1298, 1263, 1213, 1195, 1180, 1133, 1076, 1007; MS (70 ev, EI) *m/z* (%) 334 (M<sup>+</sup>, 14.35), 263 (100); HRMS calcd for C<sub>23</sub>H<sub>26</sub>O<sub>2</sub> (M<sup>+</sup>): 334.1933, found: 334.1929.

4*R*\*,5*R*\*-**5ca**, major, the more polar isomer, liquid: <sup>1</sup>H NMR (300 MHz, CDCl<sub>3</sub>) δ 7.64-7.51 (m, 4H, ArH), 7.50-7.19 (m, 5H, ArH), 6.17 (q, *J* = 1.3 Hz, 1H, =CH), 2.66 (s, 1H, OH), 2.63 (dd, *J*<sub>1</sub> = 9.0 Hz, *J*<sub>2</sub> = 5.1 Hz, 1H, CH), 1.95 (d, *J* = 1.5 Hz, 3H,

CH<sub>3</sub>), 1.64-1.49 (m, 1H, one proton from CH<sub>2</sub>), 1.41-1.19 (m, 2H, CH<sub>2</sub>), 1.19-0.83 (m, 5H, 2 × CH<sub>2</sub> + one proton from CH<sub>2</sub>), 0.74 (t, *J* = 7.1 Hz, 3H, CH<sub>3</sub>); <sup>13</sup>C NMR (75 MHz, CDCl<sub>3</sub>) δ 206.9, 177.0, 140.3, 140.1, 138.3, 129.8, 128.7, 127.3, 126.9, 126.7, 126.1, 85.3, 61.4, 31.6, 27.1, 25.9, 22.0, 13.82, 13.80; IR (neat) ν (cm<sup>-1</sup>) 3448, 3057, 3029, 2953, 2929, 2858, 1691, 1625, 1600, 1560, 1486, 1435, 1404, 1374, 1317, 1301, 1267, 1232, 1207, 1196, 1180, 1164, 1132, 1076, 1007; MS (70 ev, EI) *m/z* (%) 334 (M<sup>+</sup>, 18.23), 263 (100); HRMS calcd for C<sub>23</sub>H<sub>26</sub>O<sub>2</sub> (M<sup>+</sup>): 334.1933, found: 334.1929.

**(7) 4-Hydroxy-3-methyl-5-propyl-4-(*p*-tolyl)cyclopent-2-enone (**5db**) (mdk-8-077)**

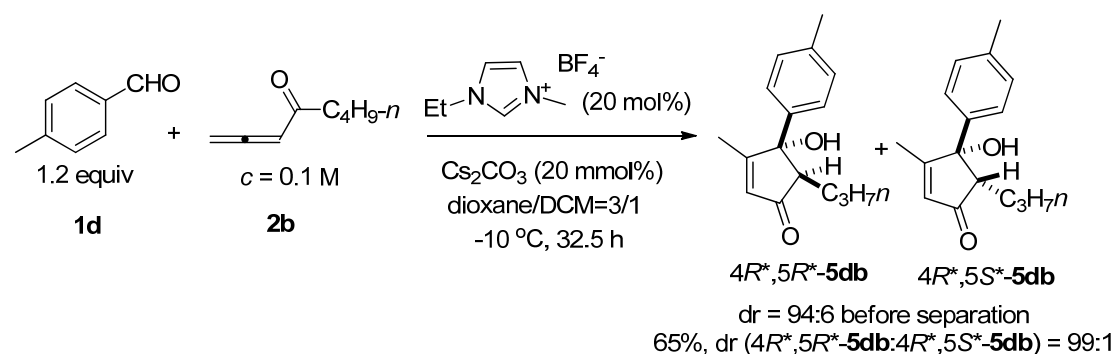

The reaction of **1d** (145.0 mg, 1.2 mmol), **2b** (124.4 mg, 1 mmol), 1-ethyl-3-methylimidazolium tetrafluoroborate (39.8 mg, 0.2 mmol), and Cs<sub>2</sub>CO<sub>3</sub> (65.4 mg, 0.2 mmol) in dioxane (7.5 mL) and dichloromethane (2.5 mL) at -10 °C for 32.5 h afforded **5db** (0.1612 g, 65%, purity 98%, dr = 99:1) (petroleum ether (30 °C ~ 60 °C)/ethyl acetate = 10/1 (440 mL) to 5/1 (480 + 120 mL) to 3/1 (400 mL)) (the dr of the crude product was 94:6 as determined via the NMR analysis) as a liquid: <sup>1</sup>H NMR (300 MHz, CDCl<sub>3</sub>) δ 7.38-6.77 (m, 4H, ArH), 6.11 (q, *J* = 1.3 Hz, 1H, =CH), 3.19 (s, 1H, OH), 2.63 (dd, *J*<sub>1</sub> = 8.7 Hz, *J*<sub>2</sub> = 5.4 Hz, 1H, CH), 2.34 (s, 3H, CH<sub>3</sub>), 1.91 (d, *J* = 1.2 Hz, 3H, CH<sub>3</sub>), 1.54-1.15 (m, 3H, CH<sub>2</sub> + one proton from CH<sub>2</sub>), 0.93-0.76 (m, 1H, one proton from CH<sub>2</sub>), 0.71 (t, *J* = 7.2 Hz, 3H, CH<sub>3</sub>); <sup>13</sup>C NMR (75 MHz,

CDCl<sub>3</sub>)  $\delta$  206.8, 176.8, 137.1, 136.3, 129.7, 128.9, 125.4, 85.4, 61.0, 28.0, 20.9, 20.8, 14.0, 13.7; IR (neat)  $\nu$  (cm<sup>-1</sup>) 3443, 3051, 3024, 2958, 2932, 2871, 1693, 1625, 1511, 1465, 1434, 1409, 1375, 1316, 1300, 1286, 1248, 1220, 1193, 1170, 1131, 1111, 1078, 1038, 1021, 1008; MS (70 ev, EI)  $m/z$  (%) 244 (M<sup>+</sup>, 16.88), 201 (100); HRMS calcd for C<sub>16</sub>H<sub>20</sub>O<sub>2</sub> (M<sup>+</sup>): 244.1463, found: 244.1472.

**(8) 5-Benzyl-4-hydroxy-3-methyl-4-(naphth-2-yl)cyclopent-2-enone (5ec)**

**(mdk-8-106)**

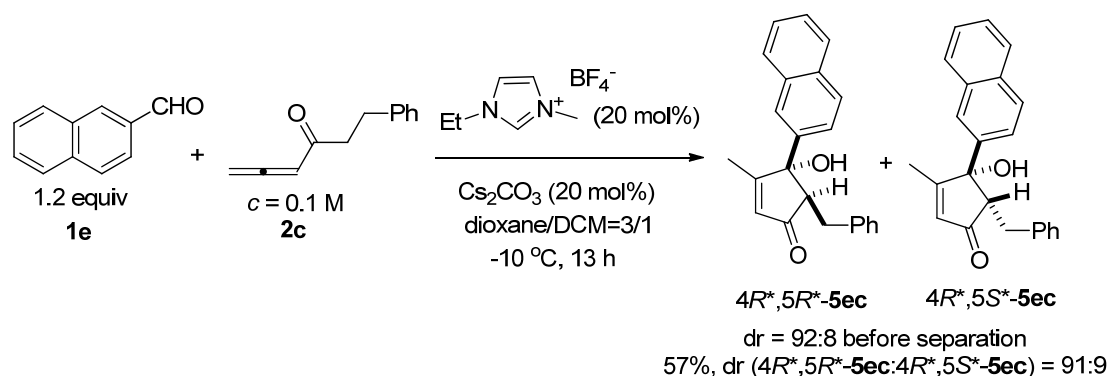

The reaction of **1e** (191.5 mg, 1.2 mmol), **2c** (173.0 mg, 1 mmol), 1-ethyl-3-methylimidazolium tetrafluoroborate (40.0 mg, 0.2 mmol), and Cs<sub>2</sub>CO<sub>3</sub> (65.1 mg, 0.2 mmol) in dioxane (7.5 mL) and dichloromethane (2.5 mL) at -10 °C for 13 h afforded **5ec** (0.1866 g, 57%, dr = 91:9) (petroleum ether (30 °C ~ 60 °C)/ethyl acetate = 10/1 (440 mL) to 5/1 (480 mL + 180 mL) to 3/1 (400 mL + 200 mL)) (the dr of the crude product was 92:8 as determined via the NMR analysis) as a liquid: <sup>1</sup>H NMR (300 MHz, CDCl<sub>3</sub>)  $\delta$  7.92-7.59 (m, 4H, ArH), 7.59-7.40 (m, 2H, ArH), 7.20-6.90 (m, 4H, ArH), 6.81-6.57 (m, 2H, ArH), [6.20 (q,  $J$  = 1.3 Hz, 0.91H), 6.17 (q,  $J$  = 1.3 Hz, 0.09H), 1H, =CH], 3.30-3.06 (m, 2H, CH<sub>2</sub>), [2.67 (s, 0.08H), 2.57 (s, 0.89H), 1H, OH], 2.22 (dd,  $J_1$  = 14.4 Hz,  $J_2$  = 9.9 Hz, 1H, CH), 1.88 (d,  $J$  = 1.2 Hz, 3H, CH<sub>3</sub>); IR (neat)  $\nu$  (cm<sup>-1</sup>) 3432, 3084, 3059, 3027, 2978, 2947, 2918, 2853, 1691, 1625,

1601, 1507, 1497, 1454, 1434, 1373, 1357, 1304, 1271, 1247, 1211, 1196, 1161, 1115, 1077, 1034, 1019; MS (70 ev, EI) m/z (%) 328 (M<sup>+</sup>, 14.99), 237 (100); Elemental analysis calcd (%) for C<sub>23</sub>H<sub>20</sub>O<sub>2</sub>: C, 84.12, H, 6.14; Found: C, 83.69; H, 6.25.

**(9) (4*R*\*,5*S*\*)-4-Hydroxy-5-isopropyl-3-methyl-4-(naphthalen-2-yl)cyclopent-2-enone (4*R*\*,5*S*\*-5ee) (mdk-8-115-1) and (4*R*\*,5*R*\*)-4-Hydroxy-5-isopropyl-3-methyl-4-(naphthalen-2-yl)cyclopent-2-enone (4*R*\*,5*R*\*-5ee) (mdk-8-115-2)**

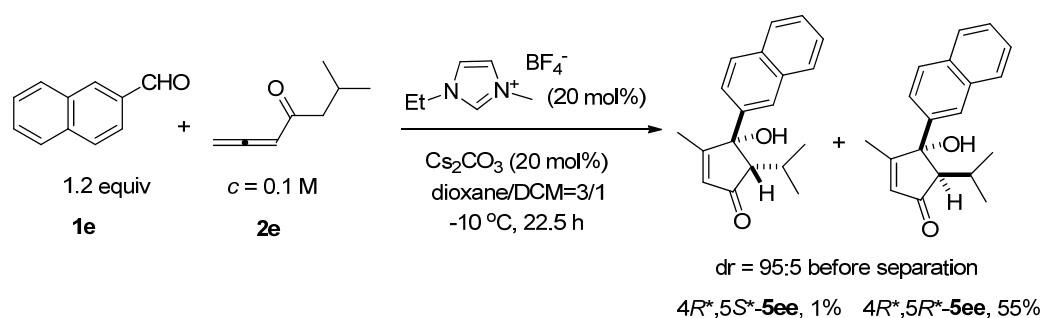

The reaction of **1e** (191.6 mg, 1.2 mmol), **2e** (124.5 mg, 1 mmol), 1-ethyl-3-methylimidazolium tetrafluoroborate (39.9 mg, 0.2 mmol), and Cs<sub>2</sub>CO<sub>3</sub> (65.1 mg, 0.2 mmol) in dioxane (7.5 mL) and dichloromethane (2.5 mL) at -10 °C for 22.5 h afforded 4*R*\*,5*S*\*-**5ee** (3.8 mg, 1%) and 4*R*\*,5*R*\*-**5ee** (156.3 mg, 55%) (petroleum ether (30 °C ~ 60 °C)/ethyl acetate = 60/1 (400 mL × 2) to 10/1 (440 mL) to 5/1 (480 mL × 3) to 3/1 (400 mL)) (the dr of the crude product was 95:5 as determined via the NMR analysis).

4*R*\*,5*S*\*-**5ee**, minor, the less polar isomer, liquid: <sup>1</sup>H NMR (300 MHz, CDCl<sub>3</sub>) δ 7.95-7.91 (m, 1H, ArH), 7.89-7.79 (m, 3H, ArH), 7.54-7.46 (m, 2H, ArH), 7.28 (dd, *J*<sub>1</sub> = 8.7 Hz, *J*<sub>2</sub> = 2.1 Hz, 1H, ArH), 6.14 (q, *J* = 1.3 Hz, 1H, =CH), 2.60 (d, *J* = 4.5 Hz, 1H, CH), 2.35-2.21 (m, 2H, one proton from CH<sub>2</sub> + OH), 1.89 (d, *J* = 1.5 Hz, 3H, CH<sub>3</sub>), 1.11 (d, *J* = 6.6 Hz, 3H, CH<sub>3</sub>), 1.06 (d, *J* = 6.6 Hz, 3H, CH<sub>3</sub>); <sup>13</sup>C NMR (75

MHz, CDCl<sub>3</sub>)  $\delta$  208.0, 177.1, 141.3, 133.1, 132.5, 131.7, 128.7, 128.1, 127.6, 126.5, 126.2, 123.3, 122.6, 83.6, 64.5, 27.8, 22.0, 19.8, 13.8; IR (neat)  $\nu$  (cm<sup>-1</sup>) 3445, 3057, 2957, 2929, 2872, 1688, 1628, 1599, 1507, 1466, 1435, 1385, 1368, 1296, 1272, 1231, 1199, 1160, 1132, 1078, 1020; MS (70 ev, EI)  $m/z$  (%) 280 (M<sup>+</sup>, 10.47), 237 (100); HRMS calcd for C<sub>19</sub>H<sub>20</sub>O<sub>2</sub> (M<sup>+</sup>): 280.1463, found: 280.1466.

**4*R*\***,**5*R*\*-5ee**, major, the more polar isomer, solid, m. p. 147~149 °C (ethyl acetate): <sup>1</sup>H NMR (300 MHz, CDCl<sub>3</sub>)  $\delta$  8.12-7.67 (m, 4H, ArH), 7.60-6.90 (m, 3H, ArH), 6.11 (q,  $J$  = 1.3 Hz, 1H, =CH), 2.56 (s, 1H, OH), 2.52 (d,  $J$  = 8.7 Hz, 1H, CH), 1.87 (d,  $J$  = 1.2 Hz, 3H, CH<sub>3</sub>), 1.84-1.73 (m, 1H, CH), 1.04 (d,  $J$  = 6.6 Hz, 3H, CH<sub>3</sub>), 0.73 (d,  $J$  = 6.6 Hz, 3H, CH<sub>3</sub>); <sup>13</sup>C NMR (75 MHz, CDCl<sub>3</sub>)  $\delta$  205.7, 175.5, 137.3, 133.0, 132.5, 130.2, 128.2, 127.8, 127.5, 126.3, 126.2, 125.1, 123.7, 85.3, 67.4, 26.5, 21.8, 20.5, 13.3; IR (neat)  $\nu$  (cm<sup>-1</sup>) 3453, 3057, 2957, 2920, 2870, 1687, 1629, 1599, 1507, 1470, 1435, 1386, 1373, 1301, 1270, 1254, 1234, 1195, 1162, 1123, 1094, 1041, 1030; MS (70 ev, EI)  $m/z$  (%) 280 (M<sup>+</sup>, 7.79), 237 (100); Elemental analysis calcd (%) for C<sub>19</sub>H<sub>20</sub>O<sub>2</sub>: C, 81.40, H, 7.19; Found: C, 81.42; H, 7.24.

**(10) 4-Hydroxy-3-methyl-4-phenylspiro[4.5]dec-2-en-1-one (5bf) (mdk-9-010-4)**

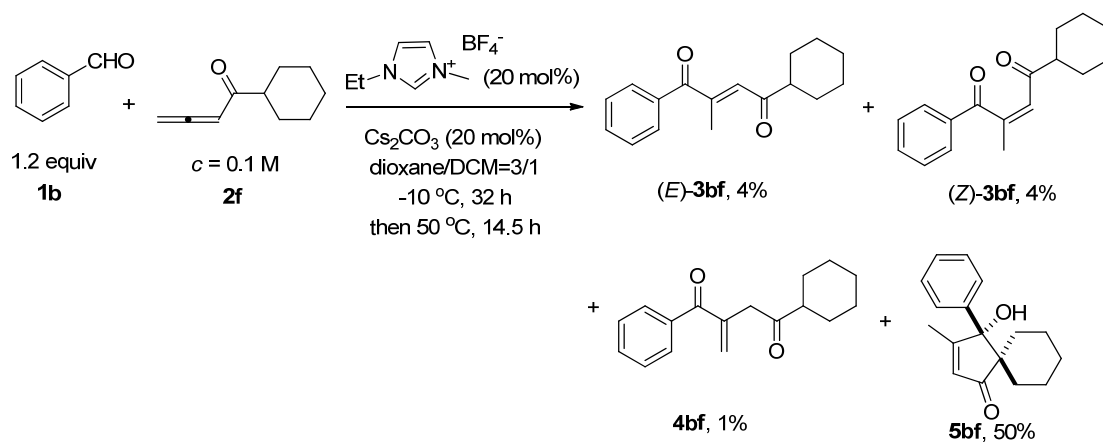

The reaction of **1b** (126.9 mg, 1.2 mmol), **2f** (150.7 mg, 1 mmol),

1-ethyl-3-methylimidazolium tetrafluoroborate (40.0 mg, 0.2 mmol), and Cs<sub>2</sub>CO<sub>3</sub> (65.0 mg, 0.2 mmol) in dioxane (7.5 mL) and dichloromethane (2.5 mL) at -10 °C for 32 h, then at 50 °C for 14.5 h afforded (*E*)-**3bf** (0.0094 g, 4%), **4bf** (0.0026 g, 1%), (*Z*)-**3bf** (0.0097 g, 4%), and **5bf** (0.1281 g, 50%) (in the order of polarity in silica gel column) (petroleum ether (60 °C ~ 90 °C, redistillation)/ethyl acetate = 40/1 (400 mL) to 30/1 (480 mL × 2 + 300 mL) to 10/1 (300 mL) to 5/1 (420 mL) to 3/1 (400 mL)).

(*E*)-**3bf**, the least polar isomer, liquid: <sup>1</sup>H NMR (300 MHz, CDCl<sub>3</sub>) δ 7.83-7.77 (m, 2H, ArH), 7.64-7.57 (m, 1H, ArH), 7.53-7.45 (m, 2H, ArH), 6.51 (q, *J* = 1.5 Hz, 1H, =CH), 2.45-2.31 (m, 4H, CH<sub>3</sub> + one proton from cyclohexyl group), 1.91-1.73 (m, 4H, from cyclohexyl group), 1.71-1.60 (m, 1H, from cyclohexyl group), 1.42-1.15 (m, 5H, from cyclohexyl group); <sup>13</sup>C NMR (75 MHz, CDCl<sub>3</sub>) δ 204.6, 198.5, 149.3, 136.1, 133.1, 130.5, 129.7, 128.5, 51.8, 28.1, 25.8, 25.5, 15.8; IR (neat) ν (cm<sup>-1</sup>) 2929, 2853, 1688, 1660, 1612, 1596, 1448, 1263, 1156, 1143, 1001; MS (70 ev, EI) *m/z* (%) 256 (M<sup>+</sup>, 8.01), 83 (100); HRMS calcd for C<sub>17</sub>H<sub>20</sub>O<sub>2</sub> (M<sup>+</sup>): 256.1463, found: 256.1465.

**4bf**, the less polar isomer, liquid: <sup>1</sup>H NMR (300 MHz, CDCl<sub>3</sub>) δ 7.87-7.80 (m, 2H, ArH), 7.57-7.50 (m, 1H, ArH), 7.48-7.40 (m, 2H, ArH), 5.89 (d, *J* = 0.9 Hz, 1H, one proton from =CH<sub>2</sub>), 5.77 (s, 1H, one proton from =CH<sub>2</sub>), 3.68 (d, *J* = 0.3 Hz, 2H, CH<sub>2</sub>), 2.53-2.41 (m, 1H, from cyclohexyl group), 1.98-1.62 (m, 5H, from cyclohexyl group), 1.46-1.16 (m, 5H, from cyclohexyl group); <sup>13</sup>C NMR (75 MHz, CDCl<sub>3</sub>) δ 210.9, 197.4, 142.3, 137.4, 132.2, 129.8, 128.7, 128.1, 50.7, 44.5, 28.4, 25.8, 25.6; IR (neat) ν (cm<sup>-1</sup>) 2929, 2853, 1707, 1656, 1598, 1448, 1339, 1317, 1213, 1143, 1068; MS (70 ev, EI) *m/z* (%) 256 (M<sup>+</sup>, 4.98), 83 (100); HRMS calcd for C<sub>17</sub>H<sub>20</sub>O<sub>2</sub> (M<sup>+</sup>):



256.1463, found: 256.1463.

(*Z*)-**3bf**, the more polar isomer, liquid:  $^1\text{H}$  NMR (300 MHz,  $\text{CDCl}_3$ )  $\delta$  7.89-7.81 (m, 2H, ArH), 7.59-7.50 (m, 1H, ArH), 7.49-7.41 (m, 2H, ArH), 6.44 (q,  $J = 1.5$  Hz, 1H, =CH), 2.42-2.29 (m, 1H, from cyclohexyl group), 2.12 (d,  $J = 1.5$  Hz, 3H,  $\text{CH}_3$ ), 1.88-1.59 (m, 5H, from cyclohexyl group), 1.33-1.09 (m, 5H, from cyclohexyl group);  $^{13}\text{C}$  NMR (75 MHz,  $\text{CDCl}_3$ )  $\delta$  201.0, 199.4, 154.1, 134.4, 133.2, 128.7, 128.3, 125.3, 50.1, 27.9, 25.7, 25.5, 21.7; IR (neat)  $\nu$  ( $\text{cm}^{-1}$ ) 2929, 2854, 1675, 1615, 1583, 1449, 1372, 1355, 1311, 1246, 1231, 1161, 1093, 1071; MS (70 eV, EI)  $m/z$  (%) 256 ( $\text{M}^+$ , 7.51), 174 (100); HRMS calcd for  $\text{C}_{17}\text{H}_{20}\text{O}_2$  ( $\text{M}^+$ ): 256.1463, found: 256.1466.

**5bf**, the most polar isomer, liquid:  $^1\text{H}$  NMR (300 MHz,  $\text{CDCl}_3$ )  $\delta$  7.72-6.67 (m, 5H, ArH), 6.13 (q,  $J = 1.4$  Hz, 1H, =CH), 2.51 (brs, 1H, OH), 1.92 (d,  $J = 1.5$  Hz, 3H,  $\text{CH}_3$ ), 1.85-1.40 (m, 6H, from cyclohexyl group), 1.38-1.06 (m, 3H, from cyclohexyl group), 0.91-0.78 (m, 1H, from cyclohexyl group);  $^{13}\text{C}$  NMR (75 MHz,  $\text{CDCl}_3$ )  $\delta$  210.5, 173.9, 140.6, 129.6, 128.0, 127.4, 125.9, 87.5, 56.3, 32.9, 30.0, 25.4, 22.4, 21.6, 14.1; IR (neat)  $\nu$  ( $\text{cm}^{-1}$ ) 3462, 3085, 3058, 3027, 2933, 2861, 1686, 1631, 1600, 1490, 1449, 1374, 1361, 1310, 1266, 1226, 1194, 1147, 1127, 1105, 1069, 1031; MS (70 eV, EI)  $m/z$  (%) 256 ( $\text{M}^+$ , 77.01), 151 (100); HRMS calcd for  $\text{C}_{17}\text{H}_{20}\text{O}_2$  ( $\text{M}^+$ ): 256.1463, found: 256.1459.

### (11) 9-Hydroxy-8-vinylideneicosan-7-one (**6fa**) (mdk-10-039)

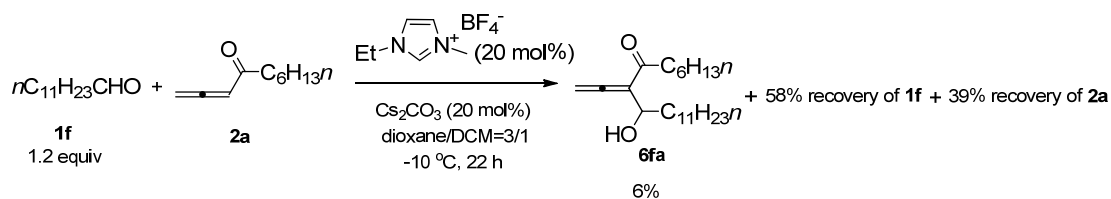

The reaction of **1f** (221.0 mg, 1.2 mmol), **2a** (152.3 mg, 1 mmol),

1-ethyl-3-methylimidazolium tetrafluoroborate (40.3 mg, 0.2 mmol), and Cs<sub>2</sub>CO<sub>3</sub> (65.1 mg, 0.2 mmol) in dioxane (7.5 mL) and dichloromethane (2.5 mL) at -10 °C for 22 h afforded **6fa** (0.0192 g, 6%) (petroleum ether (60 °C ~ 90 °C)/ethyl acetate = 15/1 (300 mL) to 10/1 (300 mL)) (58% of **1f** and 39% of **2a** were recovered, respectively, as determined via NMR analysis) as a liquid: <sup>1</sup>H NMR (300 MHz, CDCl<sub>3</sub>) δ 5.32 (d, *J* = 1.8 Hz, 2H, =CH<sub>2</sub>), 4.49-4.38 (m, 1H, CH), 3.12 (d, *J* = 5.4 Hz, 1H, OH), 2.65 (dd, *J*<sub>1</sub> = 7.8 Hz, *J*<sub>2</sub> = 6.9 Hz, 2H, CH<sub>2</sub>), 1.65-1.52 (m, 4H, CH<sub>2</sub> × 2), 1.36-1.19 (m, 24H, CH<sub>2</sub> × 12), 0.88 (t, *J* = 6.8 Hz, 6H, CH<sub>3</sub> × 2); <sup>13</sup>C NMR (75 MHz, CDCl<sub>3</sub>) δ 214.5, 203.2, 110.7, 81.2, 68.8, 39.8, 35.1, 31.9, 31.5, 29.7, 29.63, 29.62, 29.58, 29.4, 29.3, 28.8, 25.8, 24.7, 22.7, 22.5, 14.1, 14.0; IR (neat) ν (cm<sup>-1</sup>) 3472, 2955, 2924, 2854, 1958, 1931, 1673, 1466, 1405, 1378, 1278, 1234, 1177, 1080, 1019; MS (70 ev, EI) *m/z* (%) 336 (M<sup>+</sup>, 1.87), 43 (100); HRMS calcd for C<sub>22</sub>H<sub>40</sub>O<sub>2</sub> (M<sup>+</sup>): 336.3028, found: 336.3026.

#### 4. Mechanistic studies

##### (1) Preparation of (*E*)-**3ba** and (*Z*)-**3ba** (mdk-10-022)

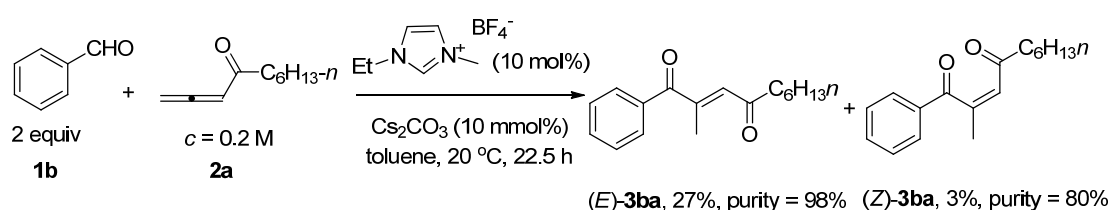

To a dry Schlenk flask was added Cs<sub>2</sub>CO<sub>3</sub> (97.8 mg, 0.3 mmol) under N<sub>2</sub>. Then 1-ethyl-3-methylimidazolium tetrafluoroborate (60.9 mg, 0.3 mmol) and toluene (7.5 mL) were added sequentially under N<sub>2</sub>. The resulting mixture was stirred at rt. After 10 min, the mixture was cooled to 20 °C, **1b** (636.4 mg, 6 mmol)/toluene (4.5 mL)

and **2a** (456.0 mg, 3 mmol)/toluene (3 mL) were added sequentially. Then the resulting mixture was stirred at 20 °C. After 22.5 h, the reaction was complete as monitored by TLC. Filtration through a short column of silica gel (eluent: ethyl acetate (20 mL×3)), evaporation, and column chromatography on silica gel (petroleum ether (60 °C ~ 90 °C)/ethyl acetate = 80/1 (400 mL × 4) to 40/1 (400 mL × 2) to 20/1 (420 mL × 2)) afforded (*E*)-**3ba** (0.2137 g, 27%, purity = 98%) and (*Z*)-**3ba** (0.0265 g, 3%, purity = 80%)

(*E*)-**3ba**, the less polar isomer, liquid: <sup>1</sup>H NMR (600 MHz, CDCl<sub>3</sub>) δ 7.83-7.76 (m, 2H, ArH), 7.62-7.57 (m, 1H, ArH), 7.51-7.45 (m, 2H, ArH), 6.45 (q, *J* = 1.2 Hz, 1H, =CH), 2.51 (t, *J* = 7.5 Hz, 2H, CH<sub>2</sub>), 2.36 (d, *J* = 1.2 Hz, 3H, CH<sub>3</sub>), 1.64-1.57 (m, 2H, CH<sub>2</sub>), 1.34-1.23 (m, 6H, CH<sub>2</sub> × 3), 0.88 (t, *J* = 6.9 Hz, 3H, CH<sub>3</sub>); <sup>13</sup>C NMR (75 MHz, CDCl<sub>3</sub>) δ 201.7, 198.4, 148.8, 135.9, 133.1, 130.8, 129.7, 128.5, 44.8, 31.5, 28.7, 23.7, 22.4, 15.7, 14.0; IR (neat) ν (cm<sup>-1</sup>) 3061, 3027, 2956, 2929, 2857, 1694, 1661, 1615, 1597, 1579, 1448, 1405, 1377, 1361, 1316, 1265, 1209, 1179, 1155, 1130, 1075, 1031, 1003; MS (70 ev, EI) *m/z* (%) 258 (M<sup>+</sup>, 38.90), 105 (100); HRMS calcd for C<sub>17</sub>H<sub>22</sub>O<sub>2</sub> (M<sup>+</sup>): 258.1620, found: 258.1621.

(*Z*)-**3ba**, the more polar isomer, liquid: <sup>1</sup>H NMR (300 MHz, CDCl<sub>3</sub>) δ 7.90-7.83 (m, 2H, ArH), 7.60-7.52 (m, 1H, ArH), 7.50-7.40 (m, 2H, ArH), 6.37 (q, *J* = 1.5 Hz, 1H, =CH), 2.44 (t, *J* = 7.4 Hz, 2H, CH<sub>2</sub>), 2.12 (d, *J* = 1.5 Hz, 3H, CH<sub>3</sub>), 1.56-1.43 (m, 2H, CH<sub>2</sub>), 1.28-1.13 (m, 6H, CH<sub>2</sub> × 3), 0.84 (t, *J* = 6.8 Hz, 3H, CH<sub>3</sub>); <sup>13</sup>C NMR (75 MHz, CDCl<sub>3</sub>) δ 199.4, 198.5, 153.7, 134.4, 133.3, 128.7, 128.3, 126.1, 42.9, 31.5, 28.7, 23.6, 22.4, 21.6, 14.0; IR (neat) ν (cm<sup>-1</sup>) 2955, 2929, 2857, 1674, 1615, 1583,

1449, 1405, 1370, 1310, 1239, 1159, 1123, 1076; MS (70 ev, EI)  $m/z$  (%) 258 ( $M^+$ , 6.39), 105 (100); HRMS calcd for  $C_{17}H_{22}O_2$  ( $M^+$ ): 258.1620, found: 258.1623.

**(2) Reactions of (*E*)-3ba and (*Z*)-3ba in the presence of  $Cs_2CO_3$  respectively**

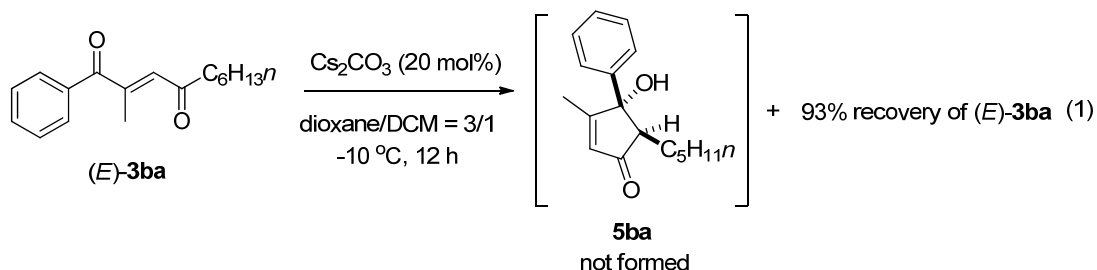

To a dry Schlenk tube was added  $Cs_2CO_3$  (13.2 mg, 0.04 mmol) under  $N_2$ . Then dioxane (0.75 mL) and  $CH_2Cl_2$  (0.25 mL) were added sequentially under  $N_2$ . The mixture was cooled to  $-10$  °C, (*E*)-3ba (51.5 mg, 0.2 mmol, purity = 98%),  $CH_2Cl_2$  (0.25 mL), and dioxane (0.75 mL) were added sequentially. The resulting mixture was stirred at  $-10$  °C. After 12 h, the reaction mixture was filtrated through a short column of silica gel (eluent: ethyl acetate (15 mL $\times$ 3)), evaporated, and analyzed by NMR with 7  $\mu$ L of  $CH_2Br_2$  as the internal standard. As a result, 93% of (*E*)-3ba was recovered and 5ba was not formed.

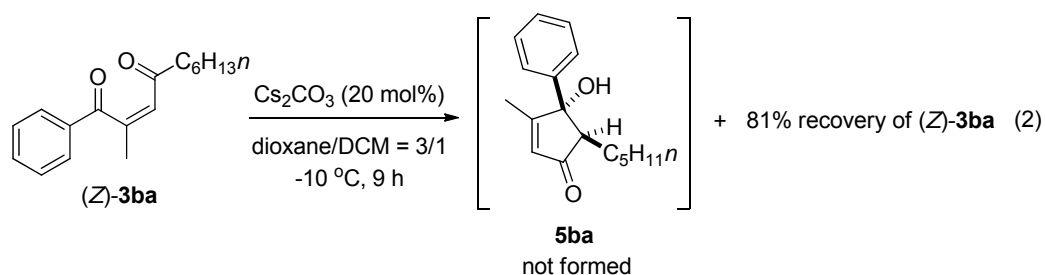

Following the procedure for eq (1), the reaction of (*Z*)-3ba (26.0 mg, 0.08 mmol, purity = 80%) and  $Cs_2CO_3$  (5.3 mg, 0.016 mmol) in dioxane (0.6 mL) and  $CH_2Cl_2$  (0.2 mL) at  $-10$  °C for 9 h afforded 81% recovery of (*Z*)-3ba without the formation of 5ba as determined by NMR analysis.

**(3) Reactions of (*E*)-3ba and (*Z*)-3ba in the presence of 1-ethyl-3-methylimidazolium tetrafluoroborate and Cs<sub>2</sub>CO<sub>3</sub> respectively**

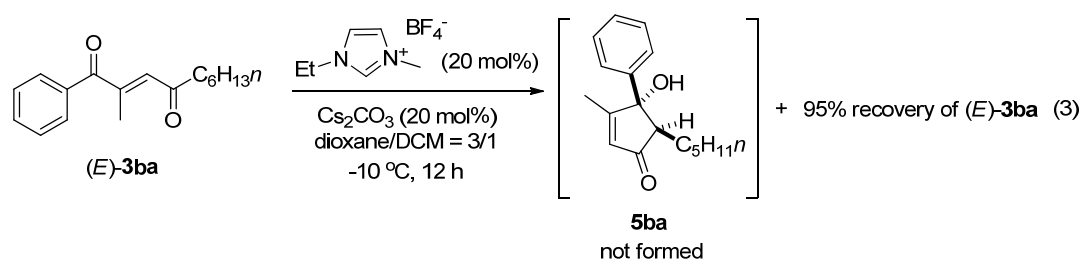

To a dry Schlenk tube was added Cs<sub>2</sub>CO<sub>3</sub> (13.1 mg, 0.04 mmol) under N<sub>2</sub>. Then 1-ethyl-3-methylimidazolium tetrafluoroborate (8.0 mg, 0.04 mmol), dioxane (0.75 mL), and CH<sub>2</sub>Cl<sub>2</sub> (0.25 mL) were added sequentially under N<sub>2</sub>. The resulting mixture was stirred at rt. After 10 min, the mixture was cooled to -10 °C, (*E*)-**3ba** (52.3 mg, 0.2 mmol, purity = 98%), CH<sub>2</sub>Cl<sub>2</sub> (0.25 mL), and dioxane (0.75 mL) were added sequentially. The resulting mixture was stirred at -10 °C. After 12 h, the reaction mixture was filtrated through a short column of silica gel (eluent: ethyl acetate (15 mL×3)), evaporated, and analyzed by NMR with 7 μL of CH<sub>2</sub>Br<sub>2</sub> as the internal standard. As a result, 95% of (*E*)-**3ba** was recovered and the formation of **5ba** was not observed.

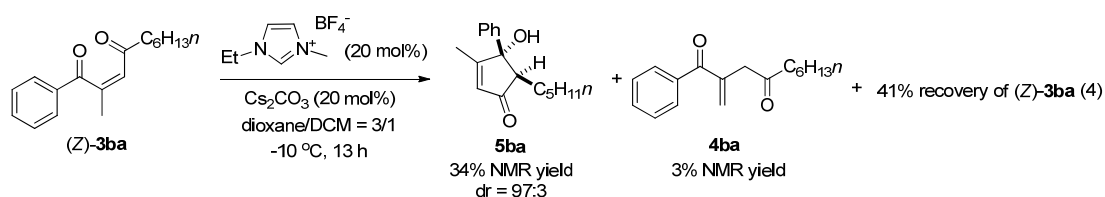

Following the procedure for eq (3), the reaction of (*Z*)-**3ba** (20.8 mg, 0.064 mmol, purity = 80%), 1-ethyl-3-methylimidazolium tetrafluoroborate (2.7 mg, 0.0128 mmol), Cs<sub>2</sub>CO<sub>3</sub> (4.3 mg, 0.0128 mmol) in dioxane (0.48 mL), and CH<sub>2</sub>Cl<sub>2</sub> (0.16 mL) at -10 °C for 13 h afforded 34% of **5ba**, 3% of **4ba**, and 41% recovery of (*Z*)-**3ba** as

determined by NMR analysis.

## 5. Preparation of (*E*)-**3aa**, **4aa**, and (*Z*)-**3aa** (mdk-10-084)

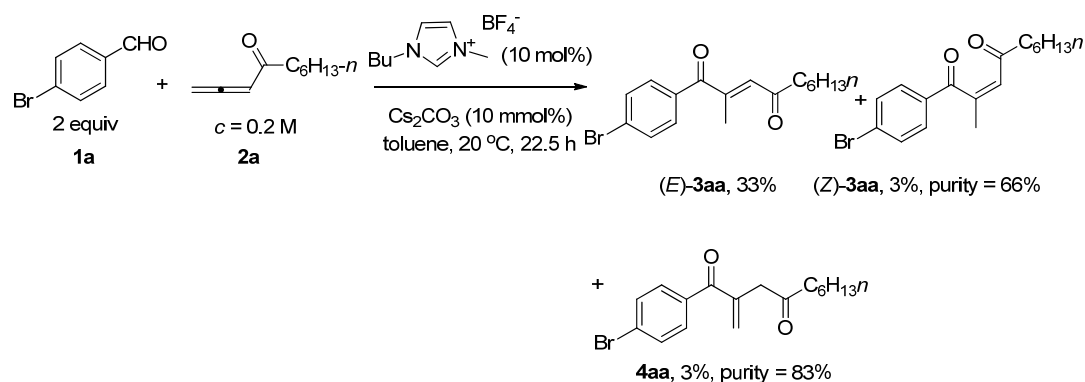

To a dry Schlenk flask was added Cs<sub>2</sub>CO<sub>3</sub> (12.9 mg, 0.04 mmol) under N<sub>2</sub>. Then 1-butyl-3-methylimidazolium tetrafluoroborate (9.1 mg, 0.04 mmol) and toluene (1 mL) were added sequentially under N<sub>2</sub>. The resulting mixture was stirred at 20 °C. After 10 min, **1a** (151.6 mg, 0.8 mmol), **2a** (60.5 mg, 0.4 mmol), and toluene (1 mL) were added sequentially. Then the resulting mixture was stirred at 20 °C. After 22.5 h, the reaction was complete as monitored by TLC. Filtration through a short column of silica gel (eluent: ethyl ether (10 mL×3)), evaporation, and column chromatography on silica gel (petroleum ether (60 °C ~ 90 °C, redistillation)/ethyl acetate = 80/1 (400 mL × 2) to 60/1 (420 mL) to 40/1 (400 mL) to 20/1 (420 mL)) afforded (*E*)-**3aa** (0.0442 g, 33%), **4aa** (0.0048 g, 3%, purity = 83%), and (*Z*)-**3aa** (0.0042 g, 3%, purity = 66%) (in the order of polarity in silica gel column)

(*E*)-**3aa**, the less polar isomer, liquid: <sup>1</sup>H NMR (600 MHz, CDCl<sub>3</sub>) δ 7.69-7.65 (m, 2H, ArH), 7.64-7.61 (m, 2H, ArH), 6.42 (q, *J* = 1.2 Hz, 1H, =CH), 2.51 (t, *J* = 7.5 Hz, 2H, CH<sub>2</sub>), 2.34 (d, *J* = 1.2 Hz, 3H, CH<sub>3</sub>), 1.64-1.57 (m, 2H, CH<sub>2</sub>), 1.34-1.24 (m, 6H, CH<sub>2</sub> × 3), 0.88 (t, *J* = 6.9 Hz, 3H, CH<sub>3</sub>); <sup>13</sup>C NMR (75 MHz, CDCl<sub>3</sub>) δ 201.6,

197.4, 148.4, 134.7, 131.9, 131.1, 128.3, 44.8, 31.5, 28.8, 23.7, 22.4, 15.6, 14.0; IR (neat)  $\nu$  ( $\text{cm}^{-1}$ ) 2955, 2929, 2857, 1694, 1667, 1661, 1615, 1585, 1567, 1481, 1464, 1456, 1396, 1378, 1304, 1261, 1177, 1155, 1130, 1109, 1069, 1008; MS (70 ev, EI)  $m/z$  (%) 338 ( $\text{M}^+(\text{}^{81}\text{Br})$ , 12.47), 336 ( $\text{M}^+(\text{}^{79}\text{Br})$ , 12.56), 113 (100); HRMS calcd for  $\text{C}_{17}\text{H}_{21}\text{}^{79}\text{BrO}_2(\text{M}^+)$ : 336.0725, found: 336.0718.

**4aa**, the “middle” isomer, liquid:  $^1\text{H}$  NMR (300 MHz,  $\text{CDCl}_3$ )  $\delta$  7.74-7.68 (m, 2H, ArH), 7.62-7.56 (m, 2H, ArH), 5.90 (s, 1H, one proton from  $=\text{CH}_2$ ), 5.72 (s, 1H, one proton from  $=\text{CH}_2$ ), 3.63 (s, 2H,  $\text{CH}_2$ ), 2.51 (t,  $J = 7.5$  Hz, 2H,  $\text{CH}_2$ ), 1.64-1.51 (m, 2H,  $\text{CH}_2$ ), 1.36-1.19 (m, 6H,  $\text{CH}_2 \times 3$ ), 0.87 (t,  $J = 6.8$  Hz, 3H,  $\text{CH}_3$ );  $^{13}\text{C}$  NMR (75 MHz,  $\text{CDCl}_3$ )  $\delta$  207.9, 196.3, 142.0, 136.0, 131.5, 131.3, 128.6, 127.3, 46.5, 42.7, 31.6, 28.8, 23.6, 22.5, 14.0; IR (neat)  $\nu$  ( $\text{cm}^{-1}$ ) 2955, 2929, 2857, 1715, 1660, 1585, 1483, 1466, 1397, 1338, 1215, 1174, 1127, 1069, 1012; MS (70 ev, EI)  $m/z$  (%) 338 ( $\text{M}^+(\text{}^{81}\text{Br})$ , 15.50), 336 ( $\text{M}^+(\text{}^{79}\text{Br})$ , 14.57), 43 (100); HRMS calcd for  $\text{C}_{17}\text{H}_{21}\text{}^{79}\text{BrO}_2(\text{M}^+)$ : 336.0725, found: 336.0729.

(*Z*)-**3aa**, the more polar isomer, liquid:  $^1\text{H}$  NMR (300 MHz,  $\text{CDCl}_3$ )  $\delta$  7.76-7.68 (m, 2H, ArH), 7.63-7.54 (m, 2H, ArH), 6.37 (q,  $J = 1.6$  Hz, 1H,  $=\text{CH}$ ), 2.44 (t,  $J = 7.4$  Hz, 2H,  $\text{CH}_2$ ), 2.10 (d,  $J = 1.2$  Hz, 3H,  $\text{CH}_3$ ), 1.56-1.44 (m, 2H,  $\text{CH}_2$ ), 1.35-1.15 (m, 6H,  $\text{CH}_2 \times 3$ ), 0.85 (t,  $J = 6.8$  Hz, 3H,  $\text{CH}_3$ );  $^{13}\text{C}$  NMR (75 MHz,  $\text{CDCl}_3$ )  $\delta$  198.5, 198.3, 153.1, 133.3, 132.1, 129.7, 128.4, 126.3, 42.9, 31.5, 28.8, 23.5, 22.4, 21.5, 14.0; IR (neat)  $\nu$  ( $\text{cm}^{-1}$ ) 2954, 2928, 2857, 1674, 1616, 1585, 1483, 1441, 1394, 1370, 1244, 1158, 1070, 1010; MS (70 ev, EI)  $m/z$  (%) 338 ( $\text{M}^+(\text{}^{81}\text{Br})$ , 9.91), 336 ( $\text{M}^+(\text{}^{79}\text{Br})$ , 9.01), 183 (100); HRMS calcd for  $\text{C}_{17}\text{H}_{21}\text{}^{79}\text{BrO}_2(\text{M}^+)$ : 336.0725, found: 336.0733.

## 6. The deuterium-labeling experiment (mdk-10-125)

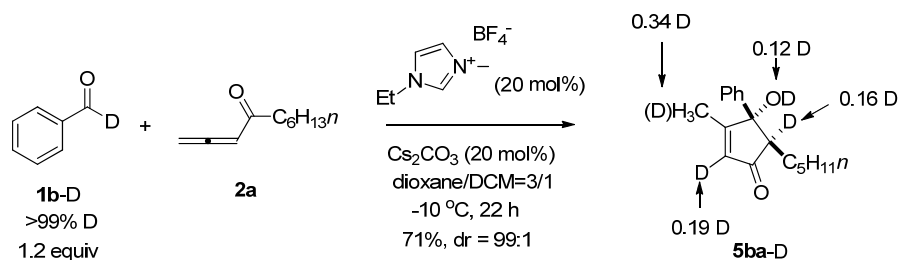

The reaction of **1b-D**<sup>8</sup> (129.0 mg, 1.2 mmol, >99% D), **2a** (152.5 mg, 1 mmol), 1-ethyl-3-methylimidazolium tetrafluoroborate (40.6 mg, 0.2 mmol), and Cs<sub>2</sub>CO<sub>3</sub> (65.3 mg, 0.2 mmol) in dioxane (7.5 mL) and dichloromethane (2.5 mL) at -10 °C for 22 h afforded **5ba-D** (184.5 mg, 71%, dr = 99:1) (petroleum ether (60 °C ~ 90 °C, redistillation)/ethyl acetate = 10/1 (440 mL) to 5/1 (480 mL)) (the dr of the crude product was 96:4 as determined via the NMR analysis) as a liquid: <sup>1</sup>H NMR (300 MHz, CDCl<sub>3</sub>) δ 7.50-6.92 (m, 5H, ArH), 1.59-1.44 (m, 1H, one proton from CH<sub>2</sub>), 1.39-0.90 (m, 6H, CH<sub>2</sub> × 3), 0.90-0.69 (m, 4H, one proton from CH<sub>2</sub> + CH<sub>3</sub>); the following signal is discernible for **5ba**: [6.14 (q, *J* = 1.5 Hz, 0.80H), 6.07 (q, *J* = 1.2 Hz, 0.01H), 0.81H, =CH], 2.81 (s, 0.88H, OH), 2.60 (dd, *J*<sub>1</sub> = 8.9 Hz, *J*<sub>2</sub> = 5.3 Hz, 0.84H, CH), 1.93-1.86 (m, 2.66H, CH<sub>3</sub>); IR (neat) ν (cm<sup>-1</sup>) 3432, 3087, 3060, 3028, 2955, 2931, 2860, 1694, 1625, 1602, 1492, 1448, 1375, 1317, 1302, 1247, 1233, 1205, 1176, 1127, 1099, 1067; MS (70 ev, EI) *m/z* (%) 259 (M<sup>+</sup>(D), 10.08), 258 (M<sup>+</sup>, 12.72), 187 (100); HRMS calcd for C<sub>17</sub>H<sub>21</sub>DO<sub>2</sub> (M<sup>+</sup>): 259.1683, found: 259.1681.



References:

- 1 S. Ma, S. Yu and S. Yin, *J. Org. Chem.*, 2003, **68**, 8996.
- 2 B. Cazes and S. Julia, *Synth. Commun.*, 1977, **7**, 273.
- 3 A. Denichoux, F. Ferreira and F. Chemla, *Org. Lett.*, 2004, **6**, 3509.
- 4 N. Jin, T. Misaki and T. Sugimura, *Chem. Lett.*, 2013, **42**, 894.
- 5 (a) L. O. Davis and S. L. Tobey, *Tetrahedron Lett.*, 2010, **51**, 6078; (b) J. Liu and S. Ma, *Tetrahedron*, 2013, **69**, 10161.
- 6 (a) S. Ma, J. Liu, S. Li, B. Chen, J. Cheng, J. Kuang, Y. Liu, B. Wan, Y. Wang, J. Ye, Q. Yu, W. Yuan and S. Yu, *Adv. Synth. Catal.*, 2011, **353**, 1005; (b) *US Pat.*, 8 748 669 B2, 2014; (c) *JP Pat.*, 5 496 366 B2, 2014; (d) *EP Pat.*, 2 599 765 B1, 2016.
- 7 J. Kuang, H. Luo and S. Ma, *Adv. Synth. Catal.*, 2012, **354**, 933.
- 8 H. Yuan, W. Yoo, H. Miyamura and S. Kobayashi, *J. Am. Chem. Soc.*, 2012, **134**, 13970.

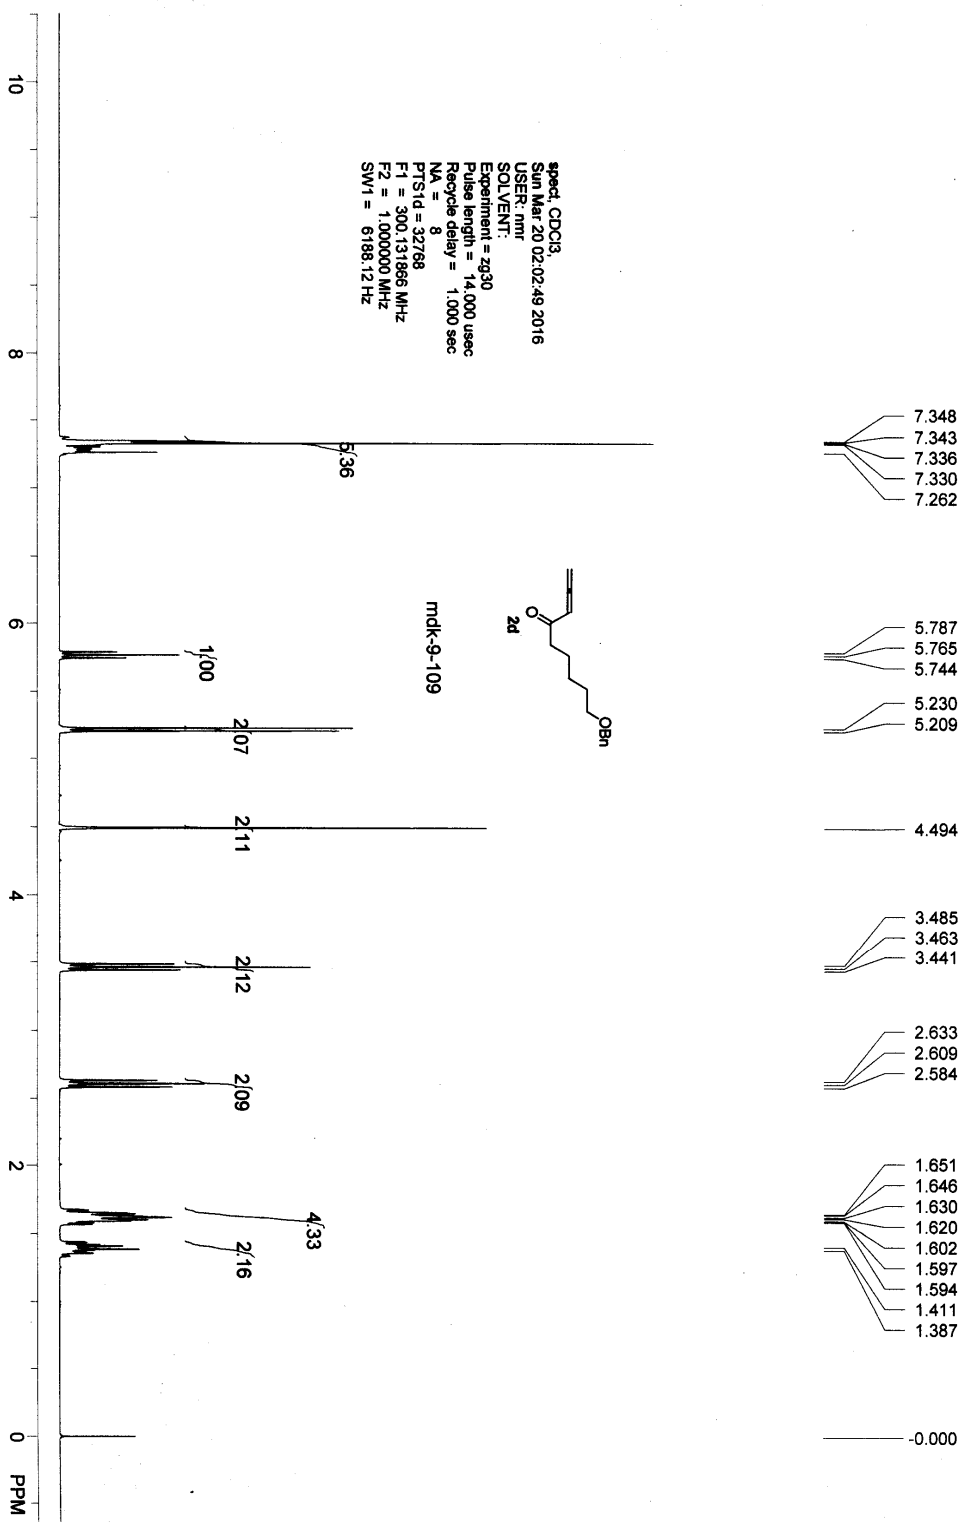

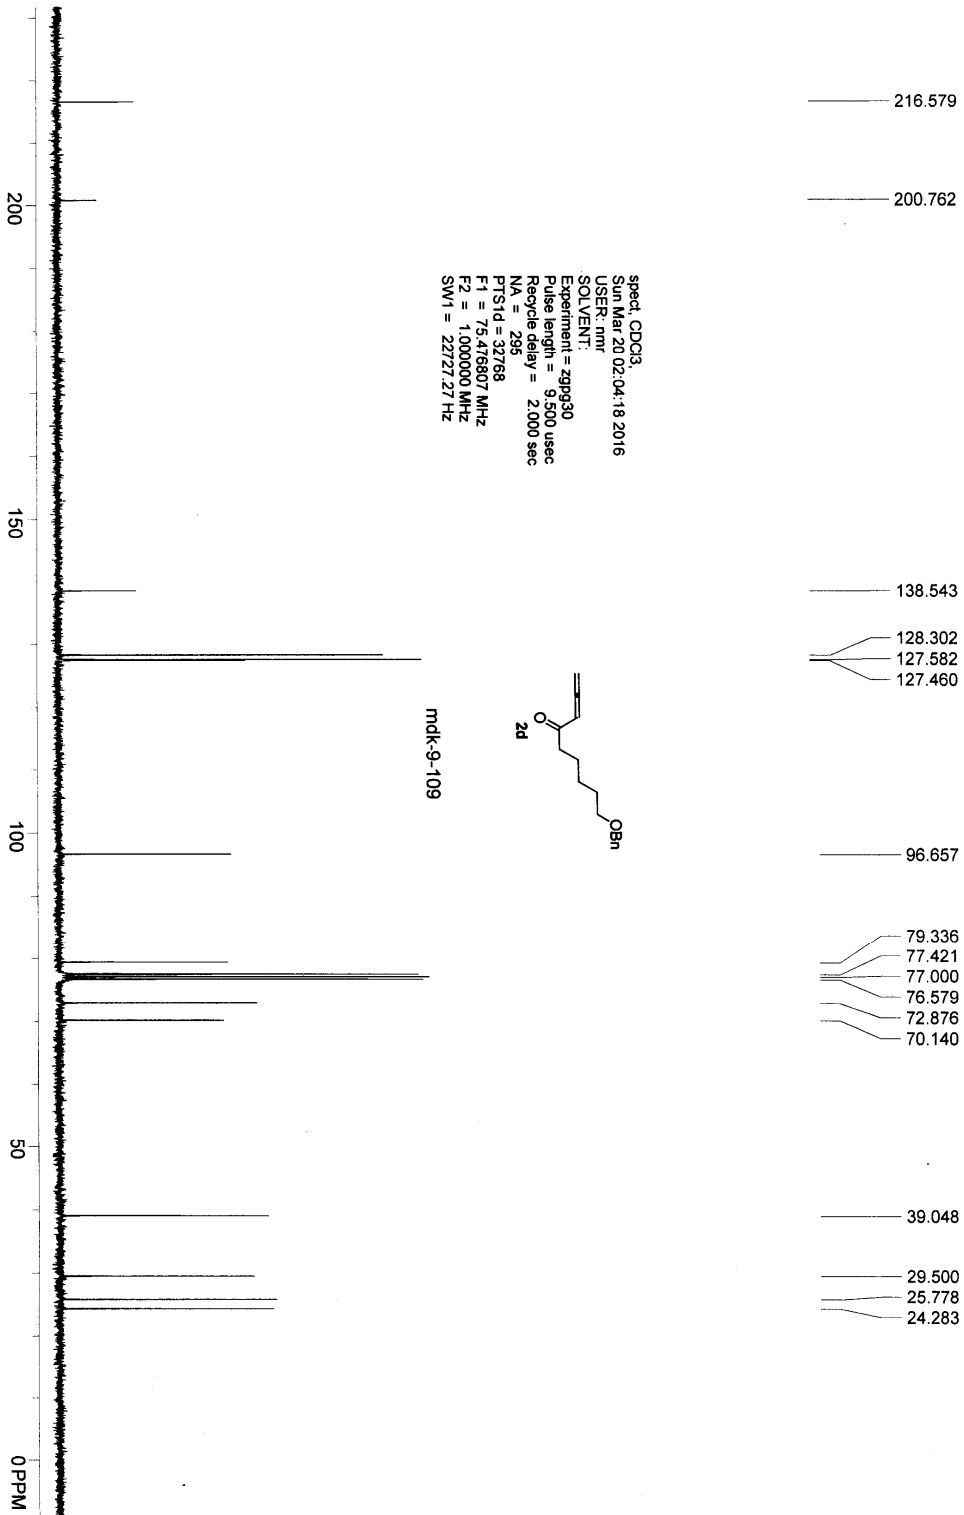

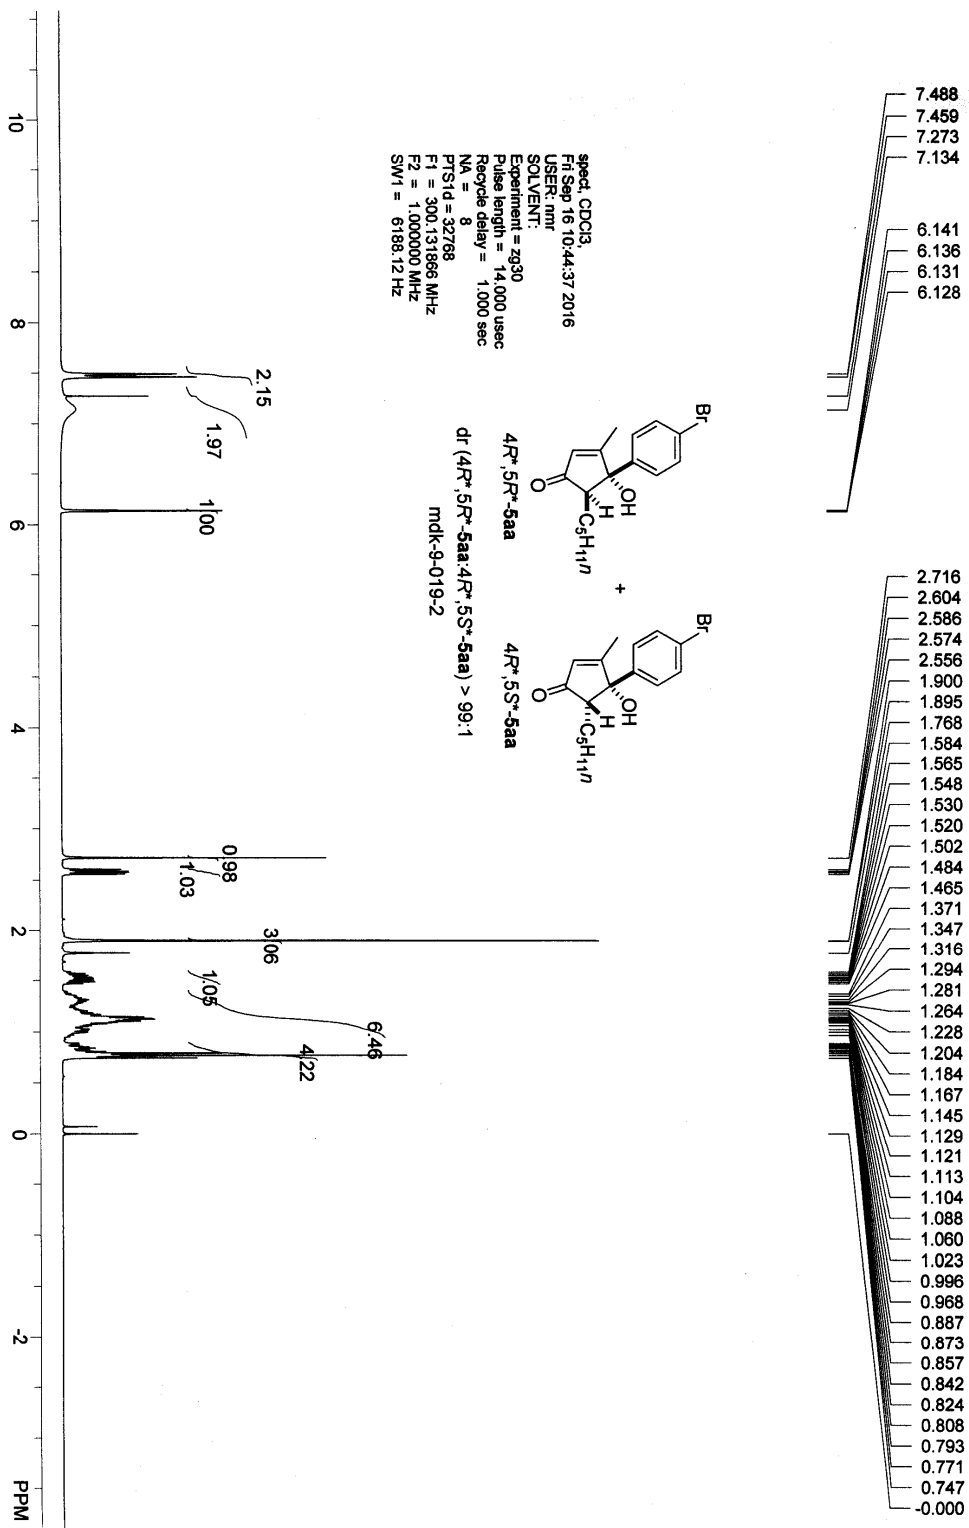

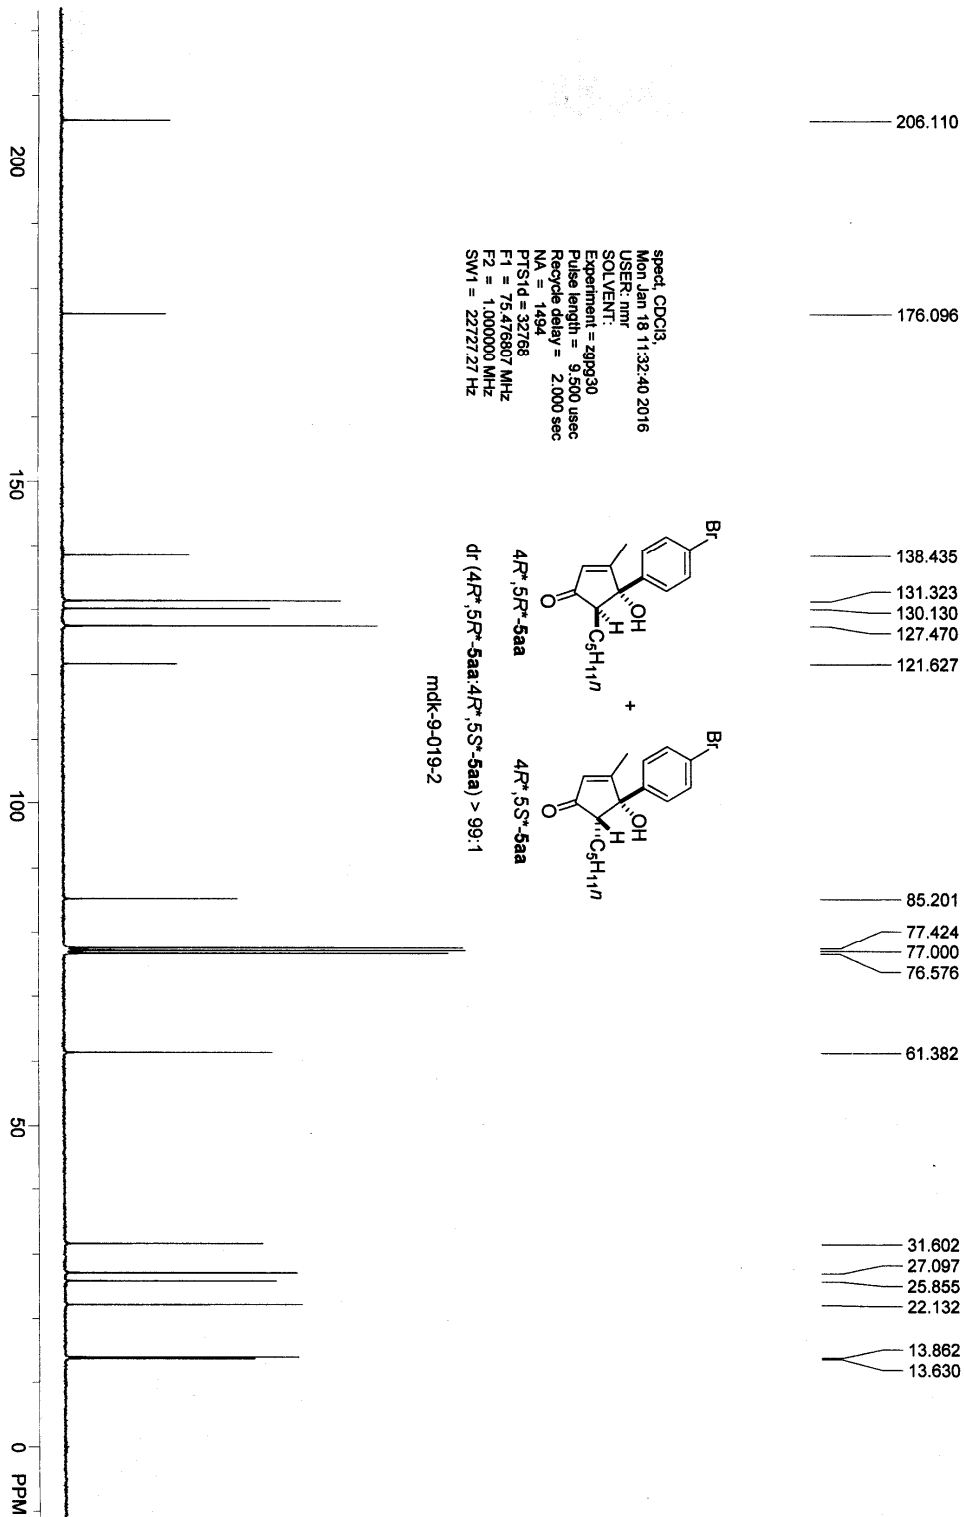

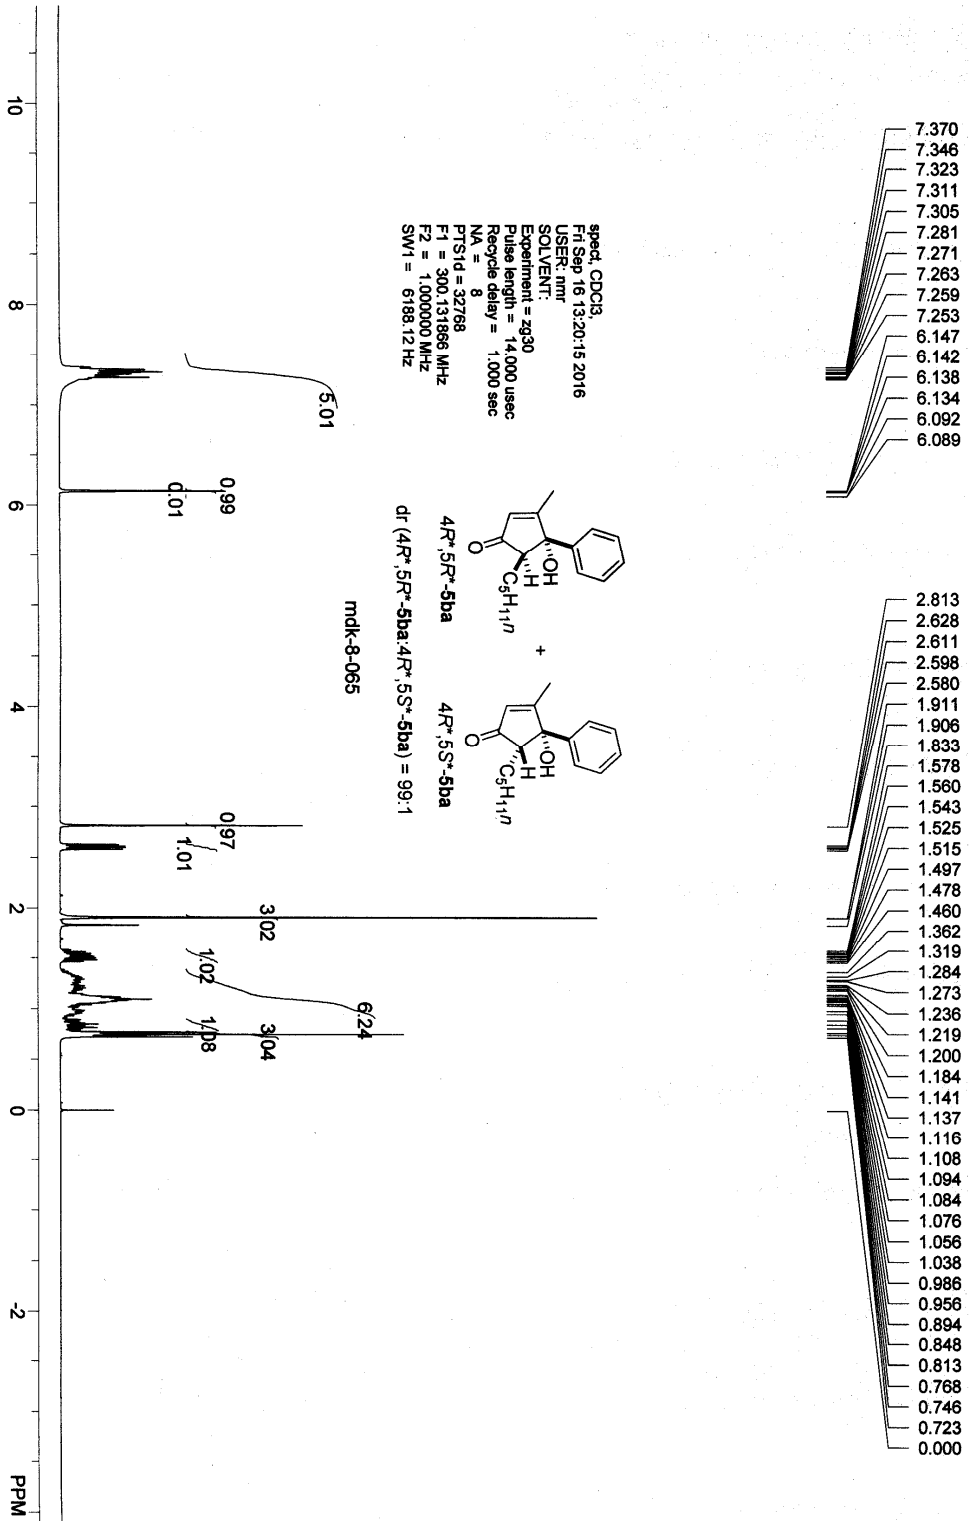

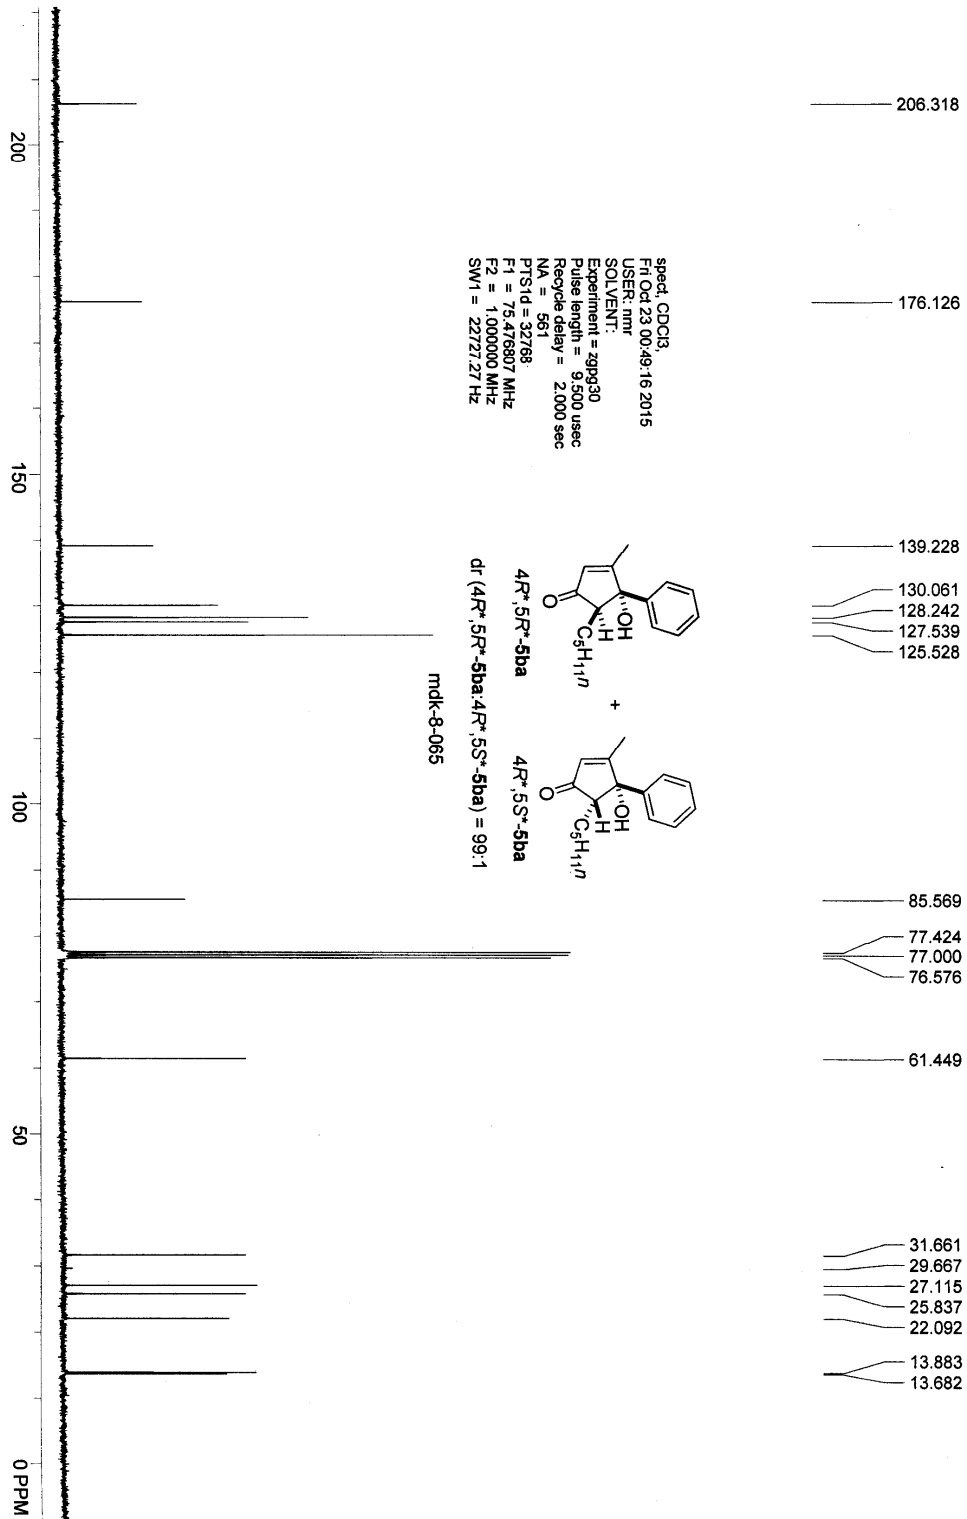

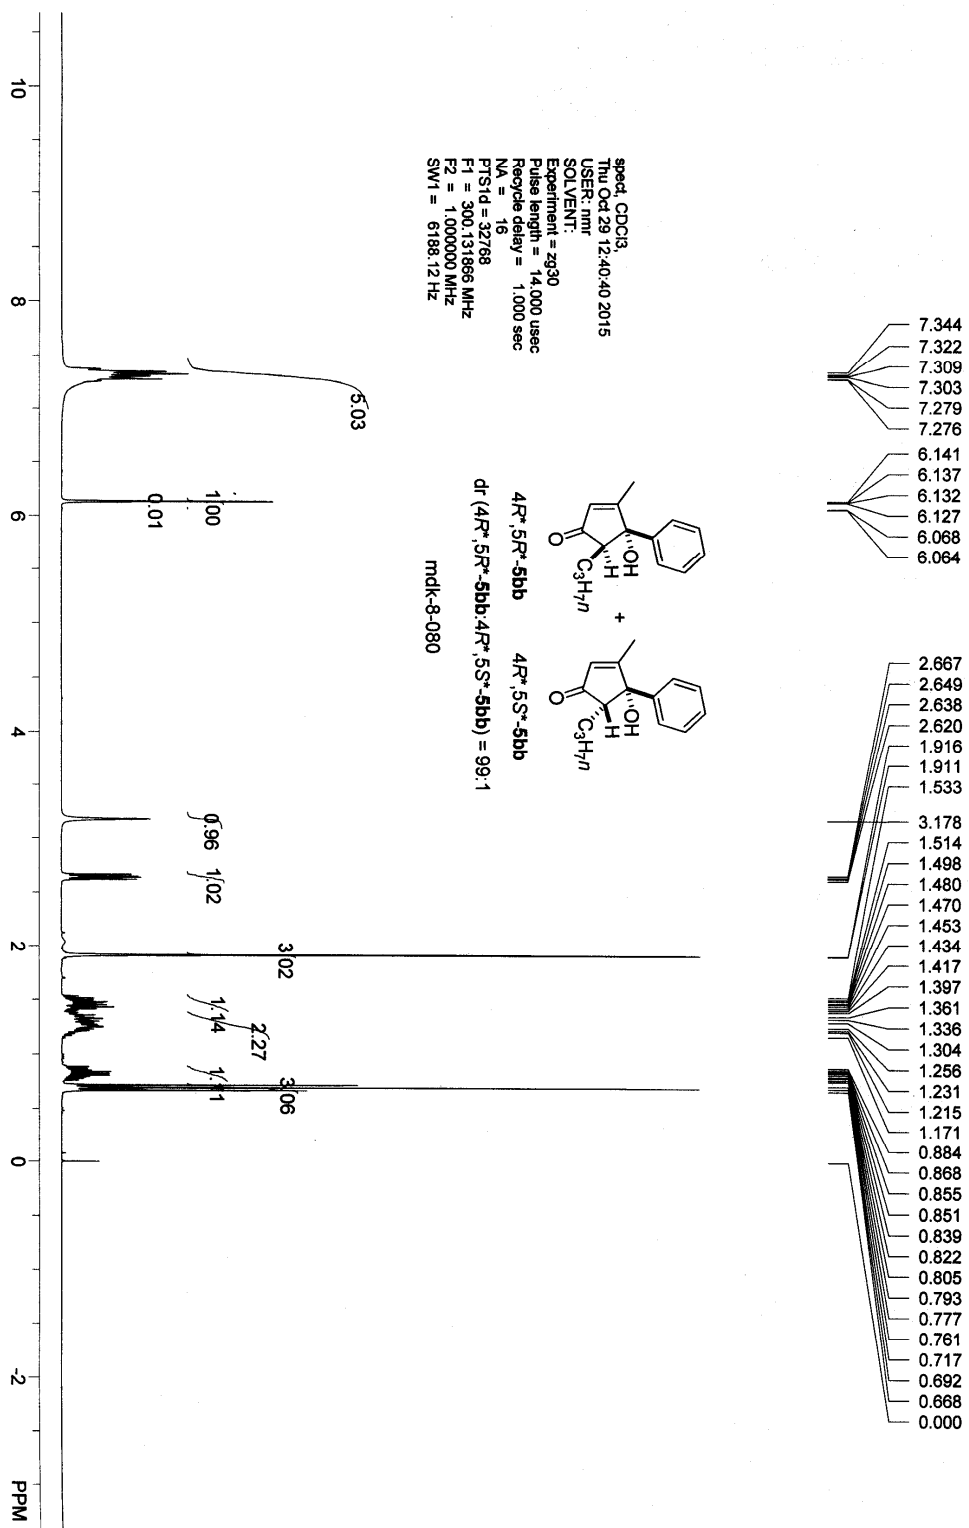



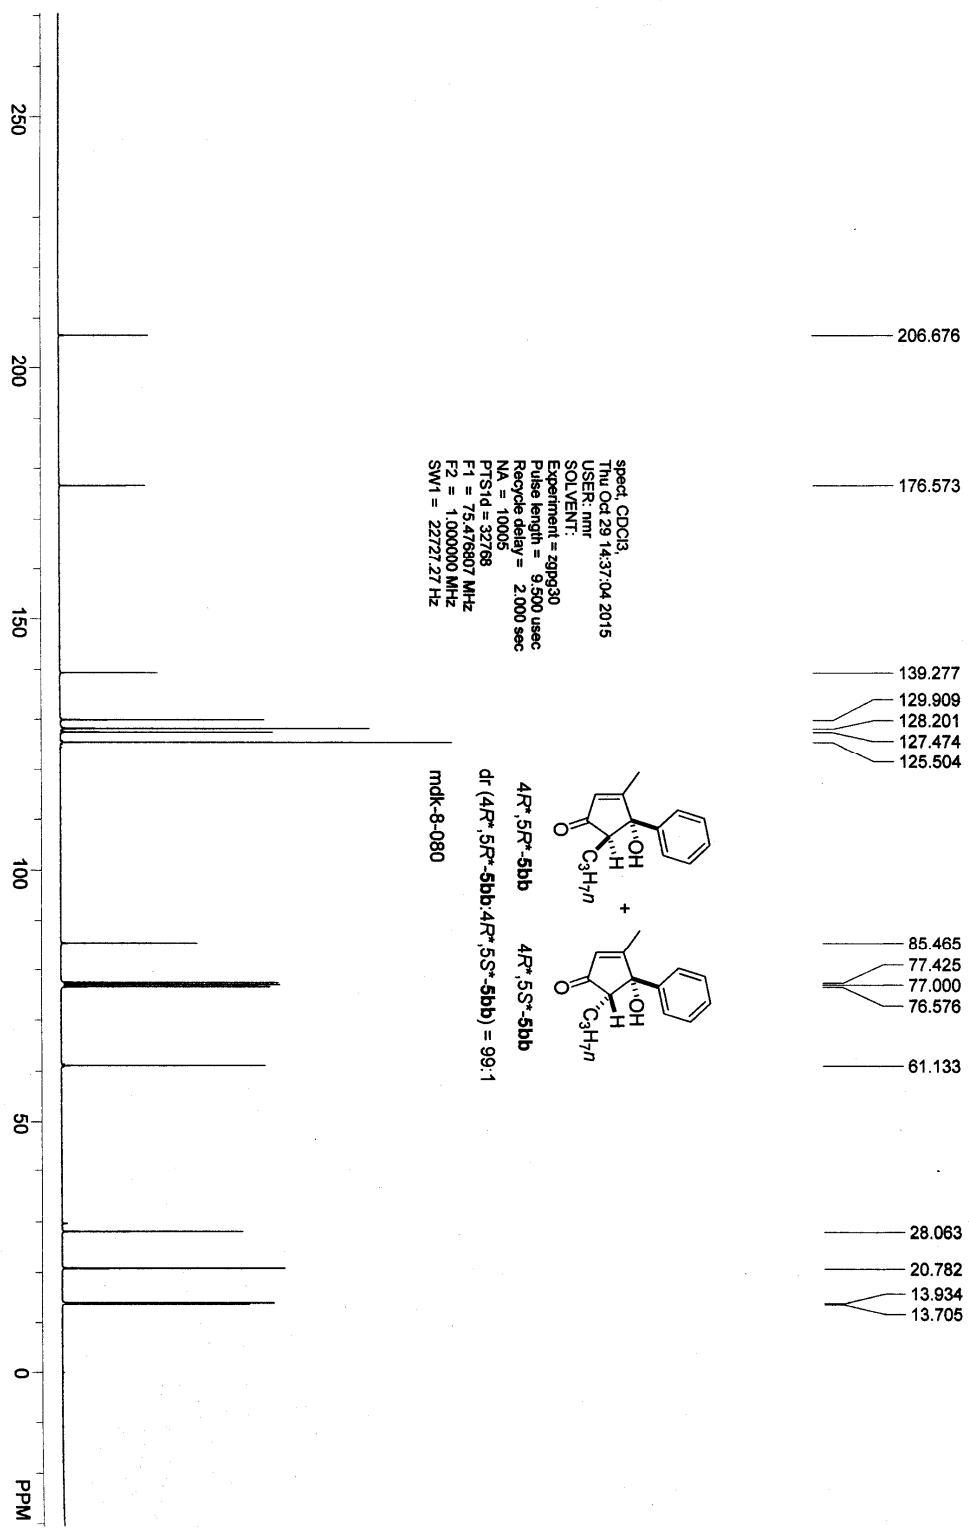

spect. CDCl<sub>3</sub>  
 Fri Sep 16 11:27:14 2016  
 USER: nmr  
 SOLVENT:  
 Experiment = 2g30  
 Pulse length = 14,000 usec  
 Recycle delay = 1,000 sec  
 NA = 8  
 P1S1d = 32768  
 F1 = 300,131866 MHz  
 F2 = 1,000000 MHz  
 SWH = 6188.12 Hz

4R<sup>+</sup> 5R<sup>+</sup> 5bc + 4R<sup>+</sup> 5S<sup>+</sup> 5bc  
 dr (4R<sup>+</sup> 5R<sup>+</sup> 5bc : 4R<sup>+</sup> 5S<sup>+</sup> 5bc) = 92:8  
 mdk-8-098

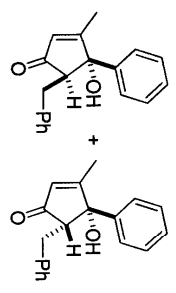

- 7.332
- 7.327
- 7.314
- 7.308
- 7.302
- 7.256
- 7.149
- 7.146
- 7.142
- 7.131
- 7.125
- 7.116
- 6.776
- 6.767
- 6.752
- 6.746
- 6.147
- 6.143
- 6.137
- 6.134
- 6.122
- 6.117
- 6.113
- 6.110
- 3.262
- 3.248
- 3.213
- 3.200
- 3.168
- 3.144
- 3.129
- 3.110
- 3.095
- 3.066
- 3.051
- 2.422
- 2.301
- 2.254
- 2.236
- 2.215
- 2.201
- 2.180
- 2.162
- 1.867
- 1.863
- 1.856
- 0.000

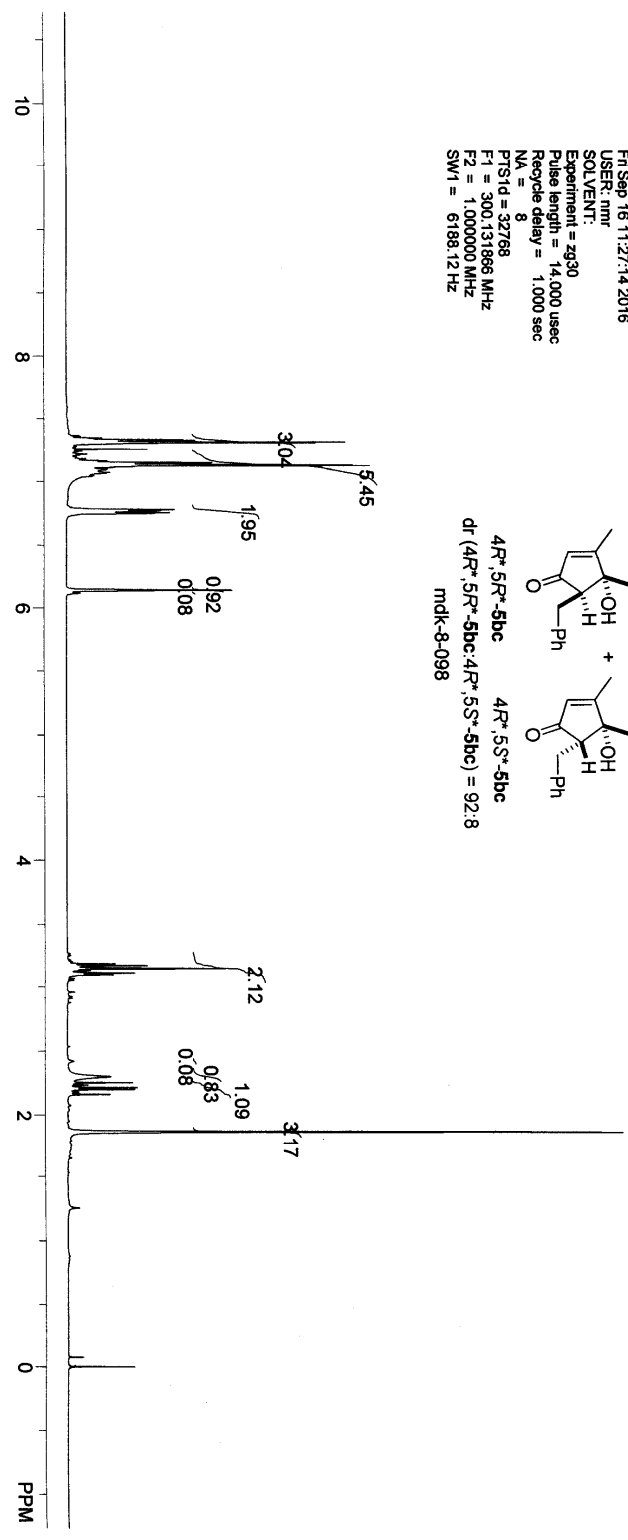

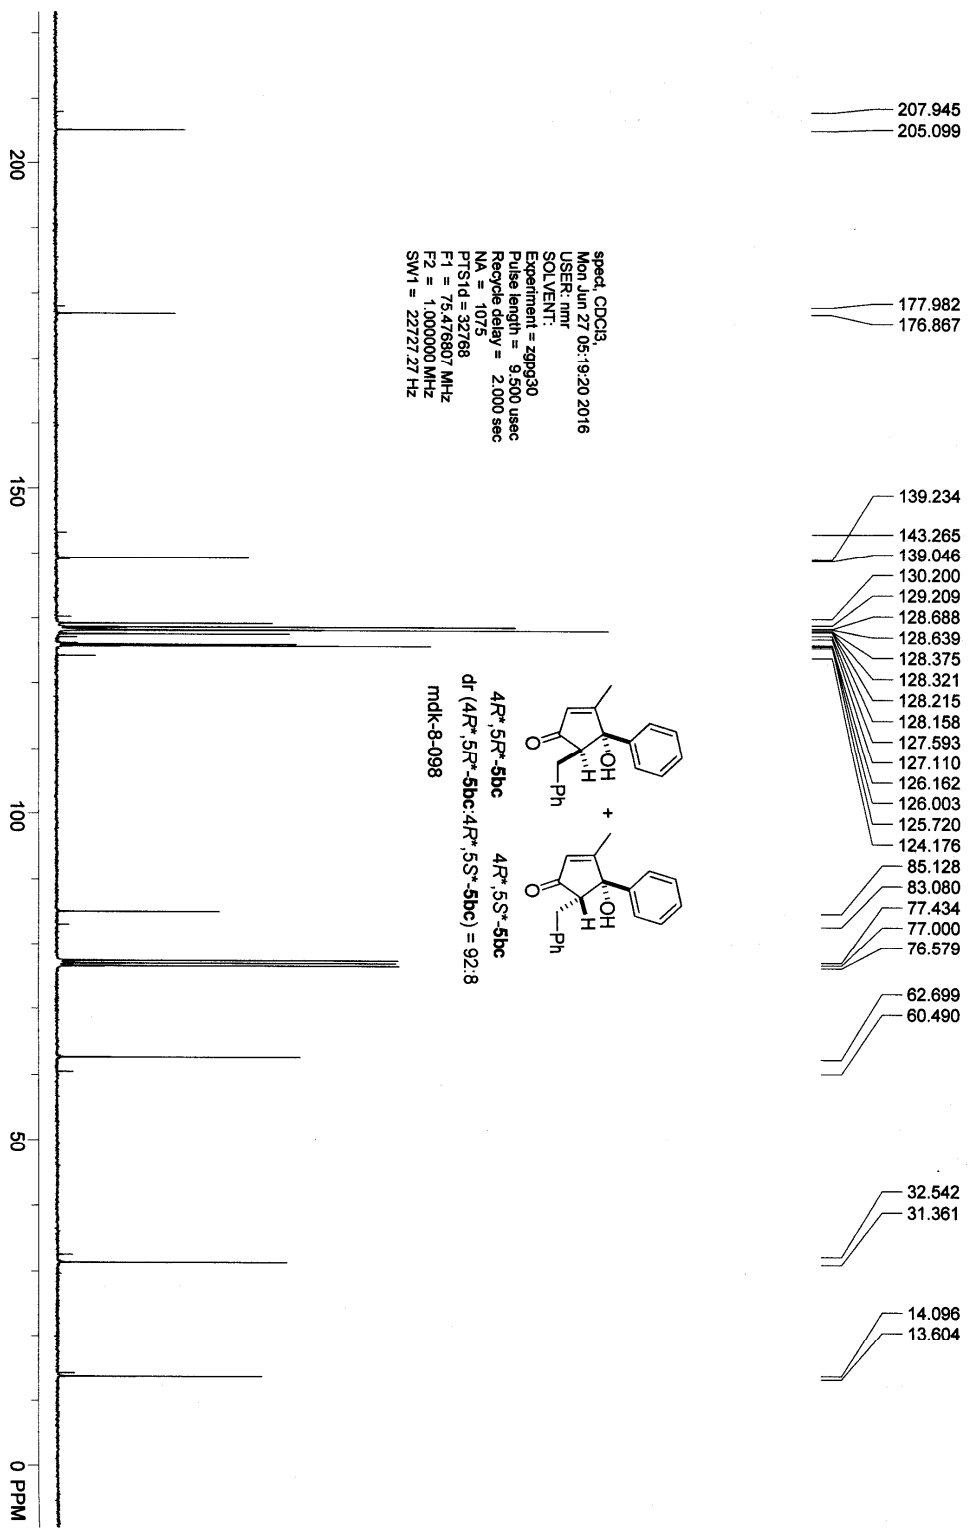

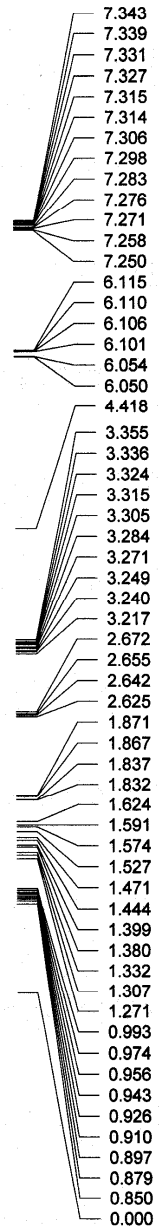

apex, CDCl<sub>3</sub>  
Thu Sep 15 11:07:09 2016  
USER: mfr  
SOLVENT:

Experiment = zg30  
Pulse length = 14.000 usec  
Recycle delay = 1.000 sec  
NA = 8  
PTSid = 32768  
F1 = 300.131866 MHz  
F2 = 1.000000 MHz  
SWH = 6188.12 Hz

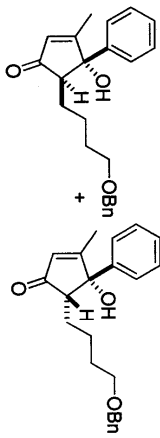

mdk-9-110

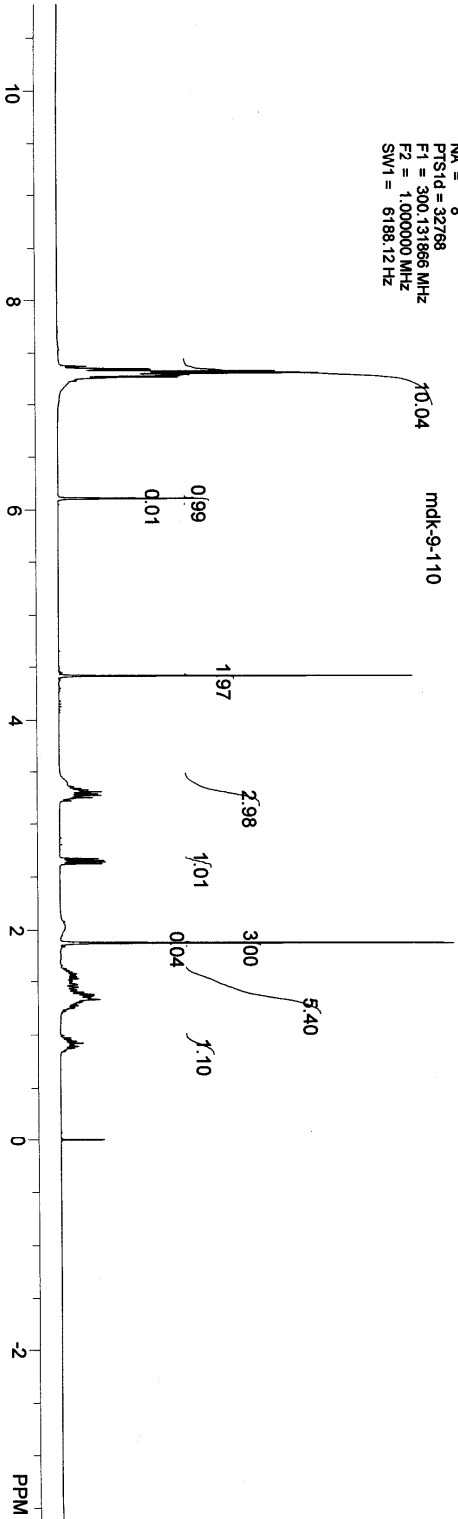

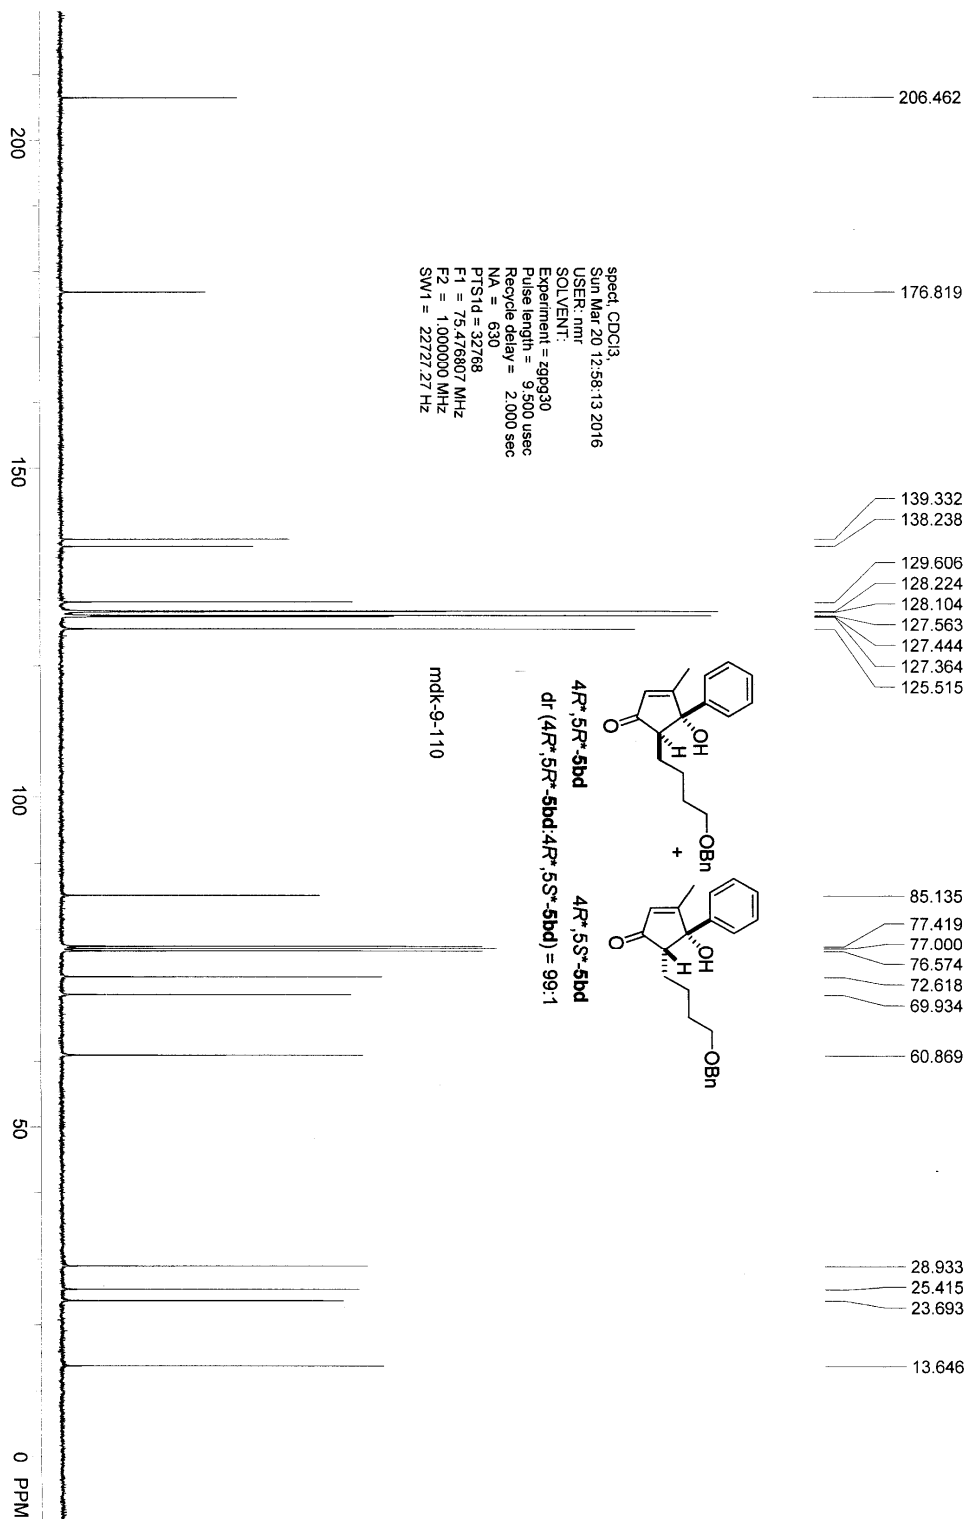

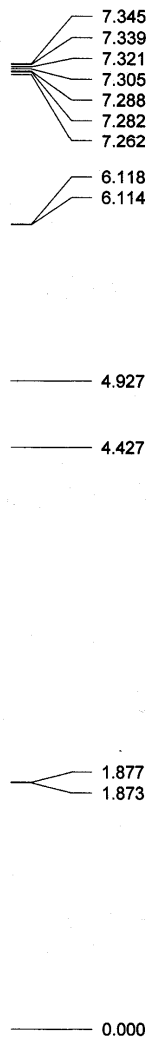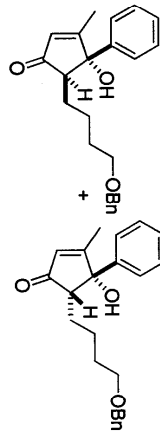

4*R*\*, 5*R*\*-5bd  
4*R*\*, 5*S*\*-5bd  
dr (4*R*\*, 5*R*\*-5bd:4*R*\*, 5*S*\*-5bd) = 99:1

spect: CDCl<sub>3</sub>  
 Sun Jun 05 05:19:40 2016  
 USER: nmf  
 SOLVENT:  
 Experiment = 2930  
 Pulse length = 14.000 usec  
 Recycle delay = 1.000 sec  
 NA = 8  
 PTS1d = 32768  
 F1 = 300.131866 MHz  
 F2 = 1.000000 MHz  
 SW1 = 6188.12 Hz  
 AT1 = 5.30 sec  
 49.8 mg sample in 14 uL CH<sub>2</sub>Br<sub>2</sub>  
 as internal standard

mdk-9-110-purity

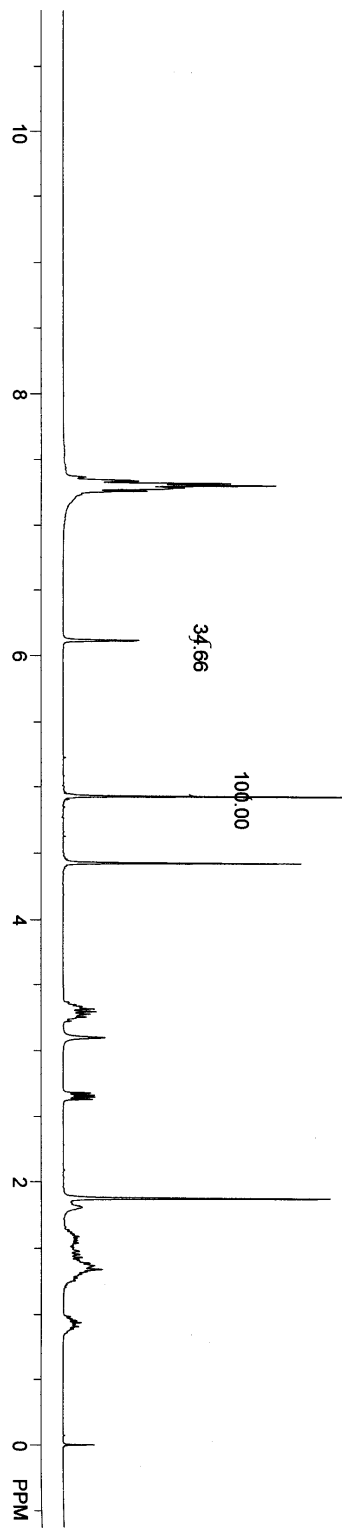

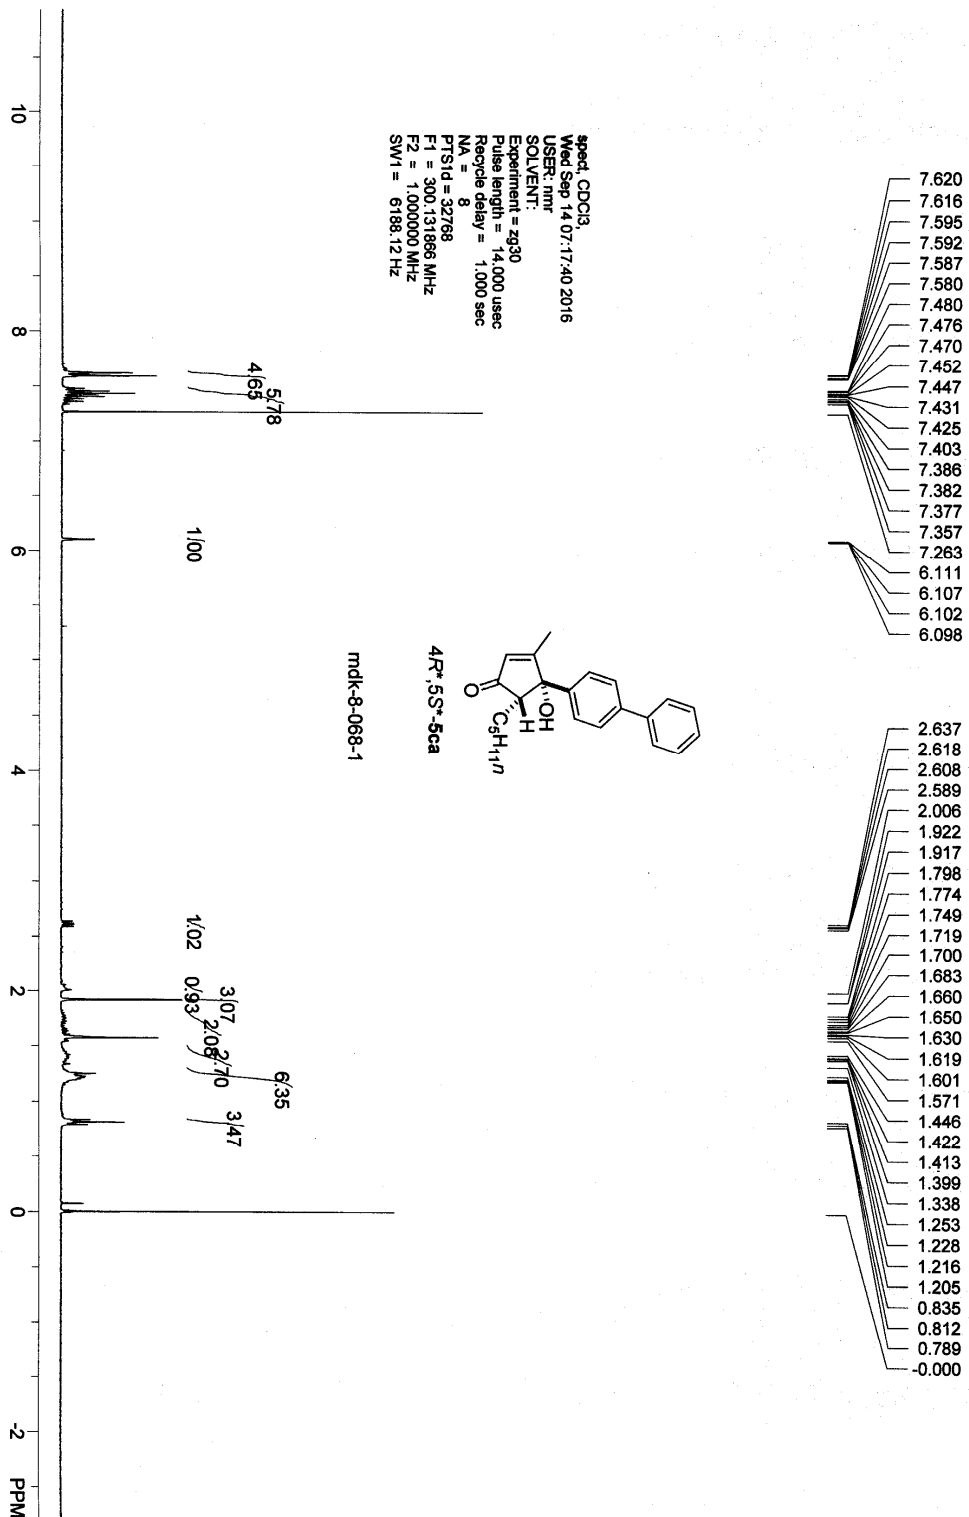

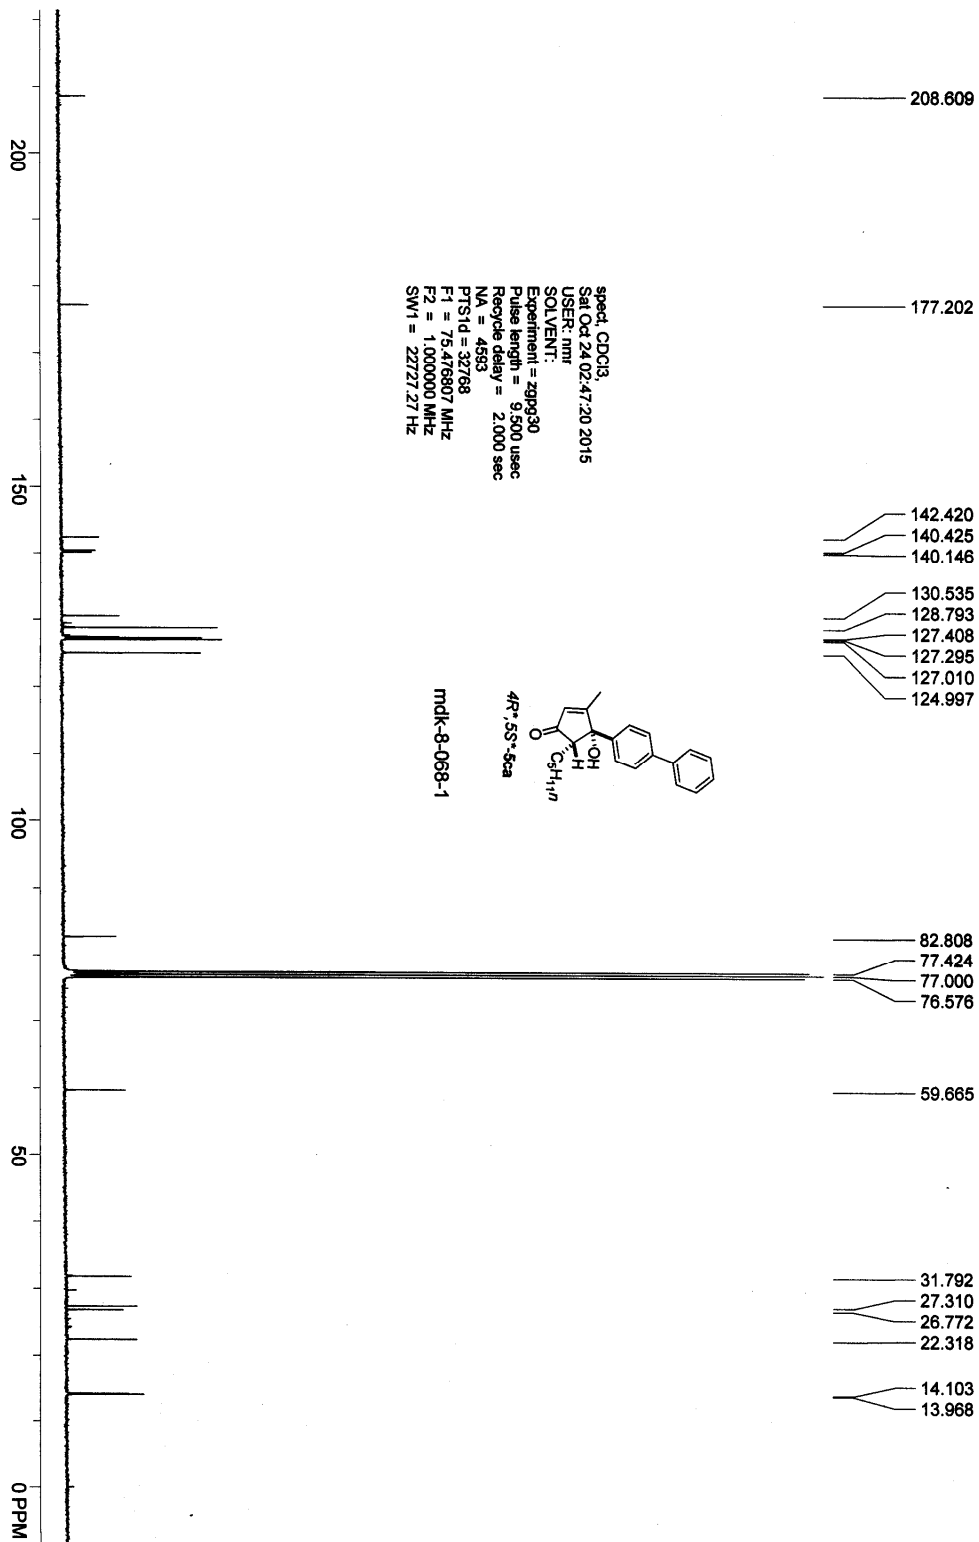



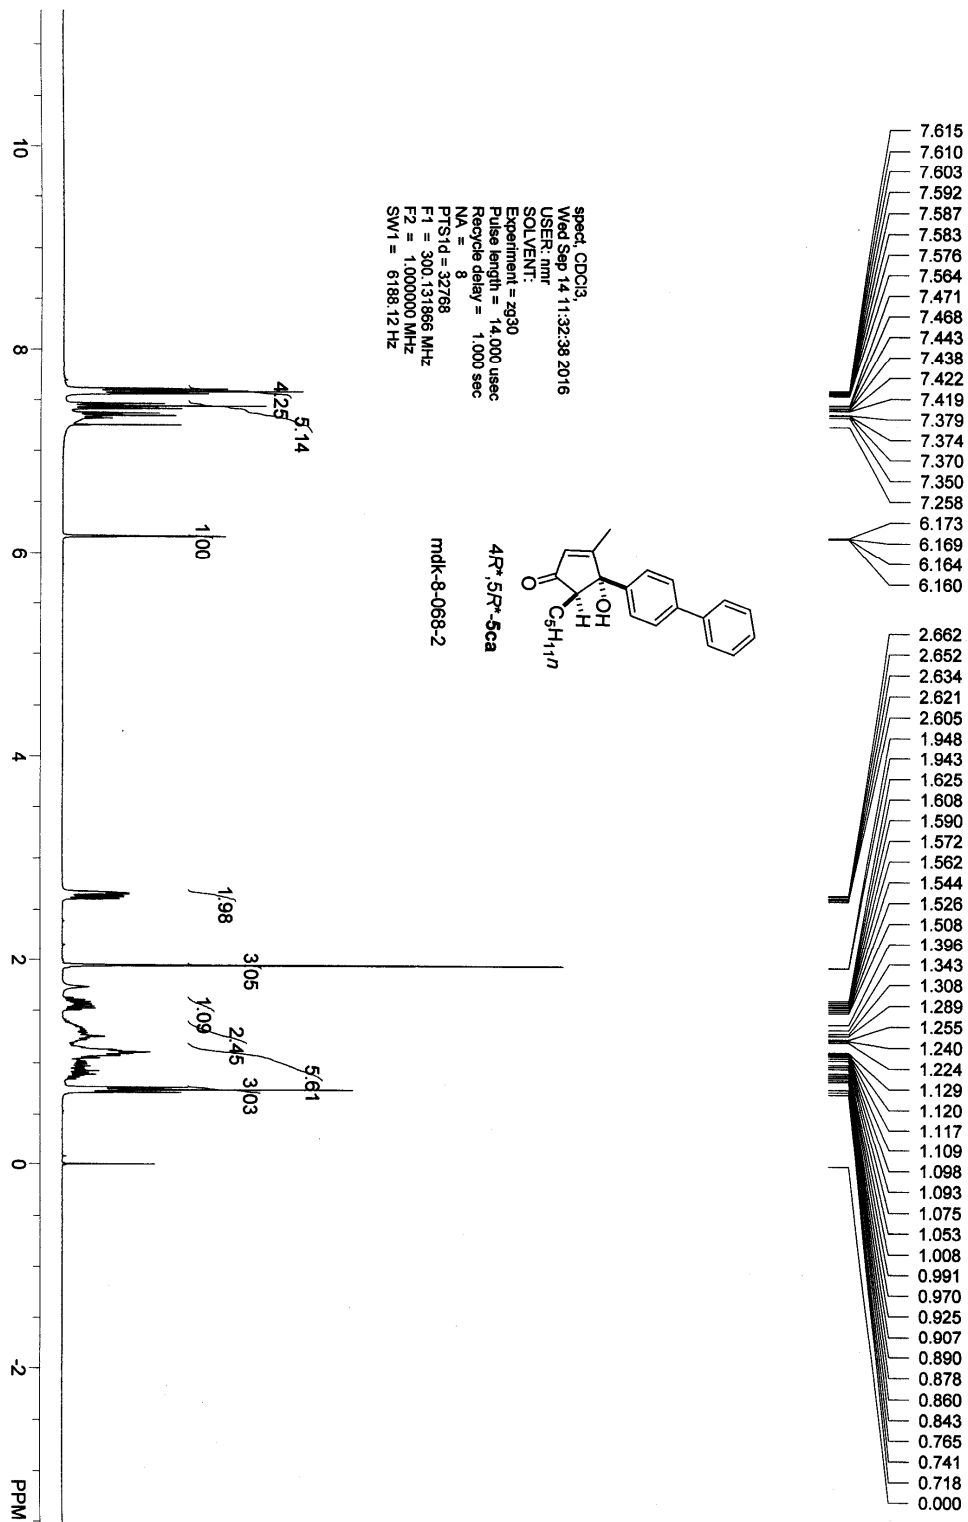

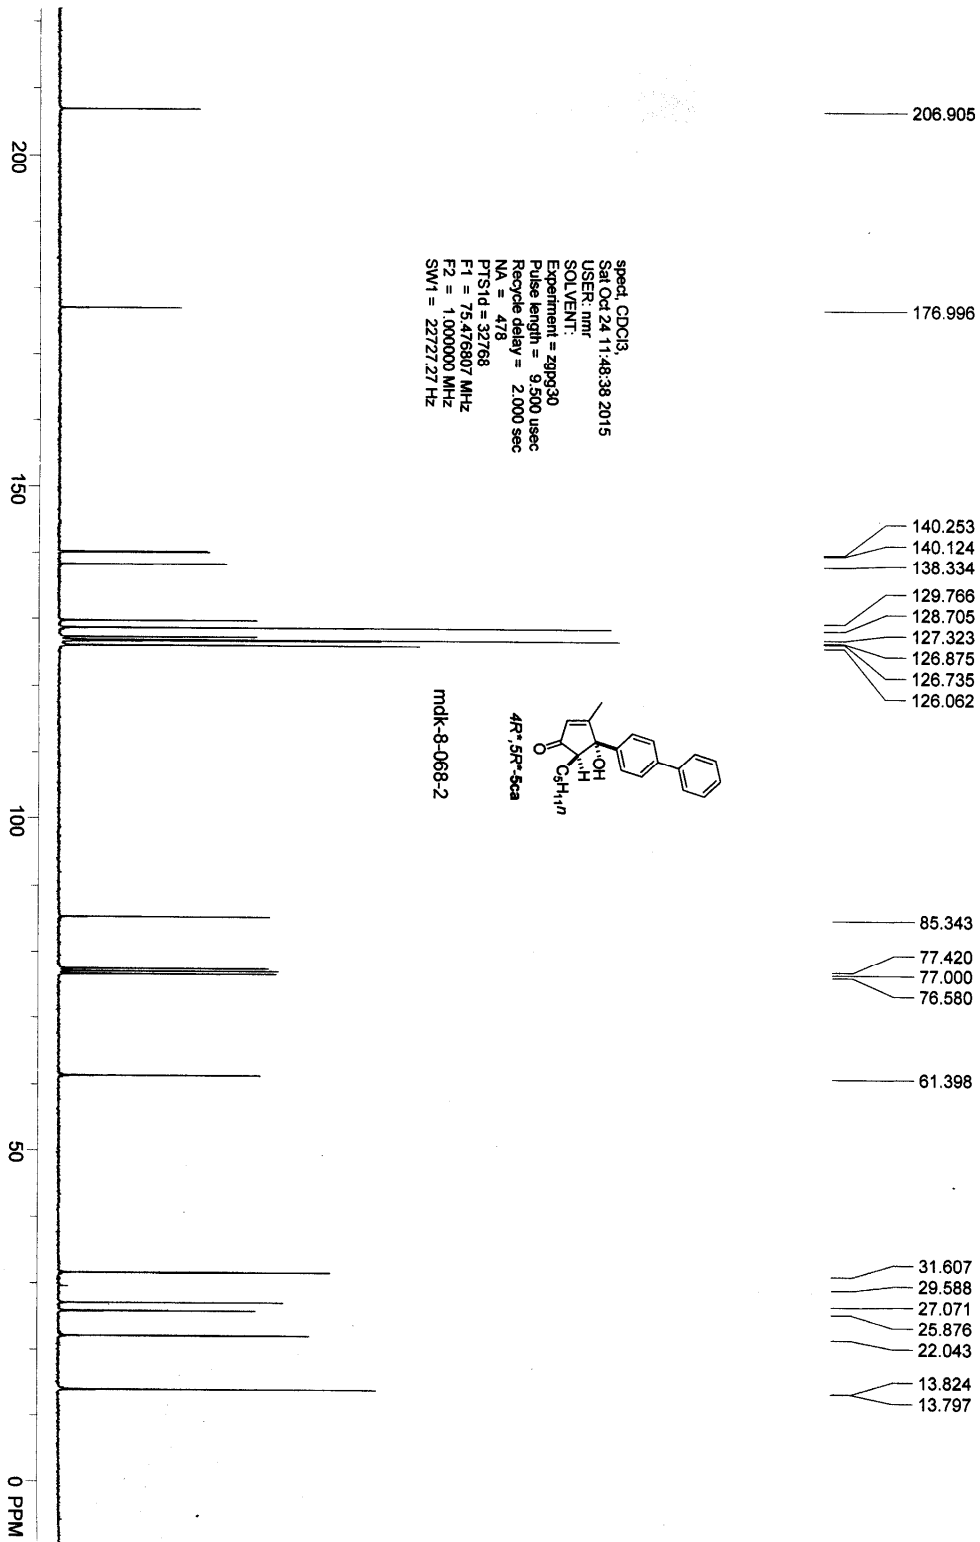

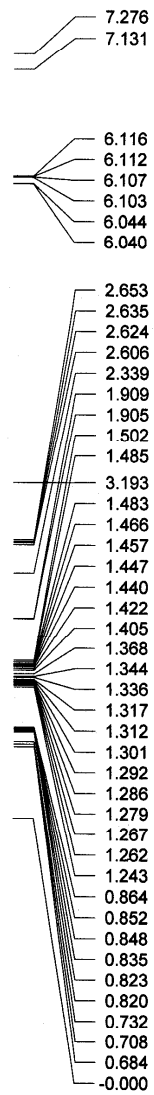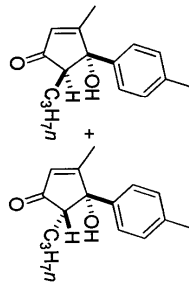

spec1, CDCl3  
 Sun Nov 01 01:06:44 2015  
 USER: nmr  
 SOLVENT:  
 Experiment = zg30  
 Pulse length = 14,000 usec  
 Recycle delay = 1,000 sec  
 NA = 16  
 P1 = 300, 131866 MHz  
 P2 = 1,000000 MHz  
 SM1 = 6188.12 Hz

mdk-8-077

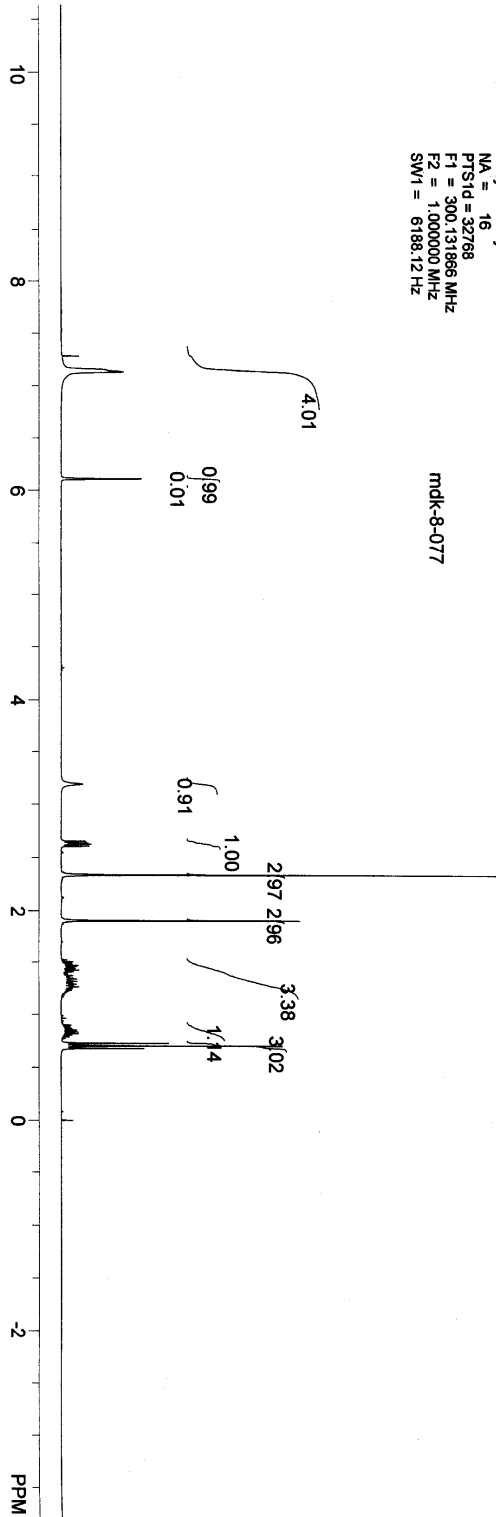

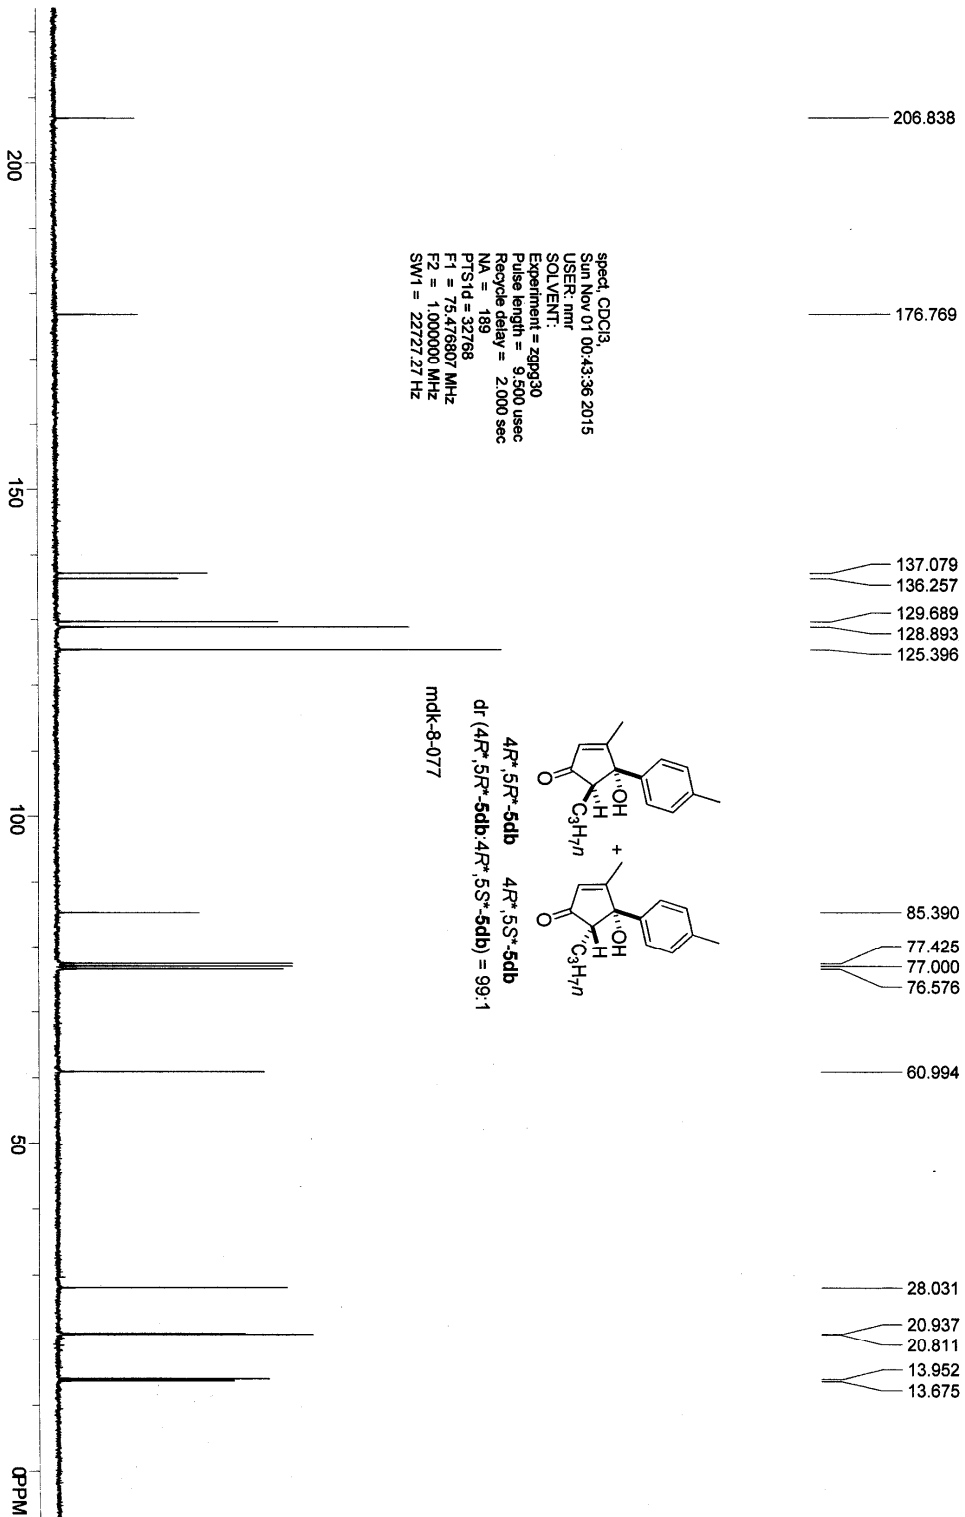

spect: CDCl3  
 Tue Nov 03 00:35:54 2015  
 USER: nmr  
 SOLVENT:  
 Experiment = 2930  
 Pulse length = 14.000 usec  
 Recycle delay = 1.000 sec  
 NA = 16  
 P1 = 32768  
 P1 = 300.131866 MHz  
 F2 = 1.000000 MHz  
 SWH = 6188.12 Hz  
 118.3 mg sample in 21 uL CH2Br2  
 as internal standard

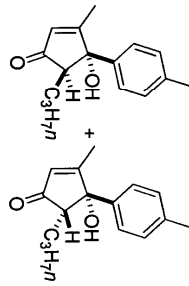

4R\*,5R\*-5db 4R\*,5S\*-5db  
 dr (4R\*,5R\*-5db/4R\*,5S\*-5db) = 99:1  
 mdlc-8-077-purity

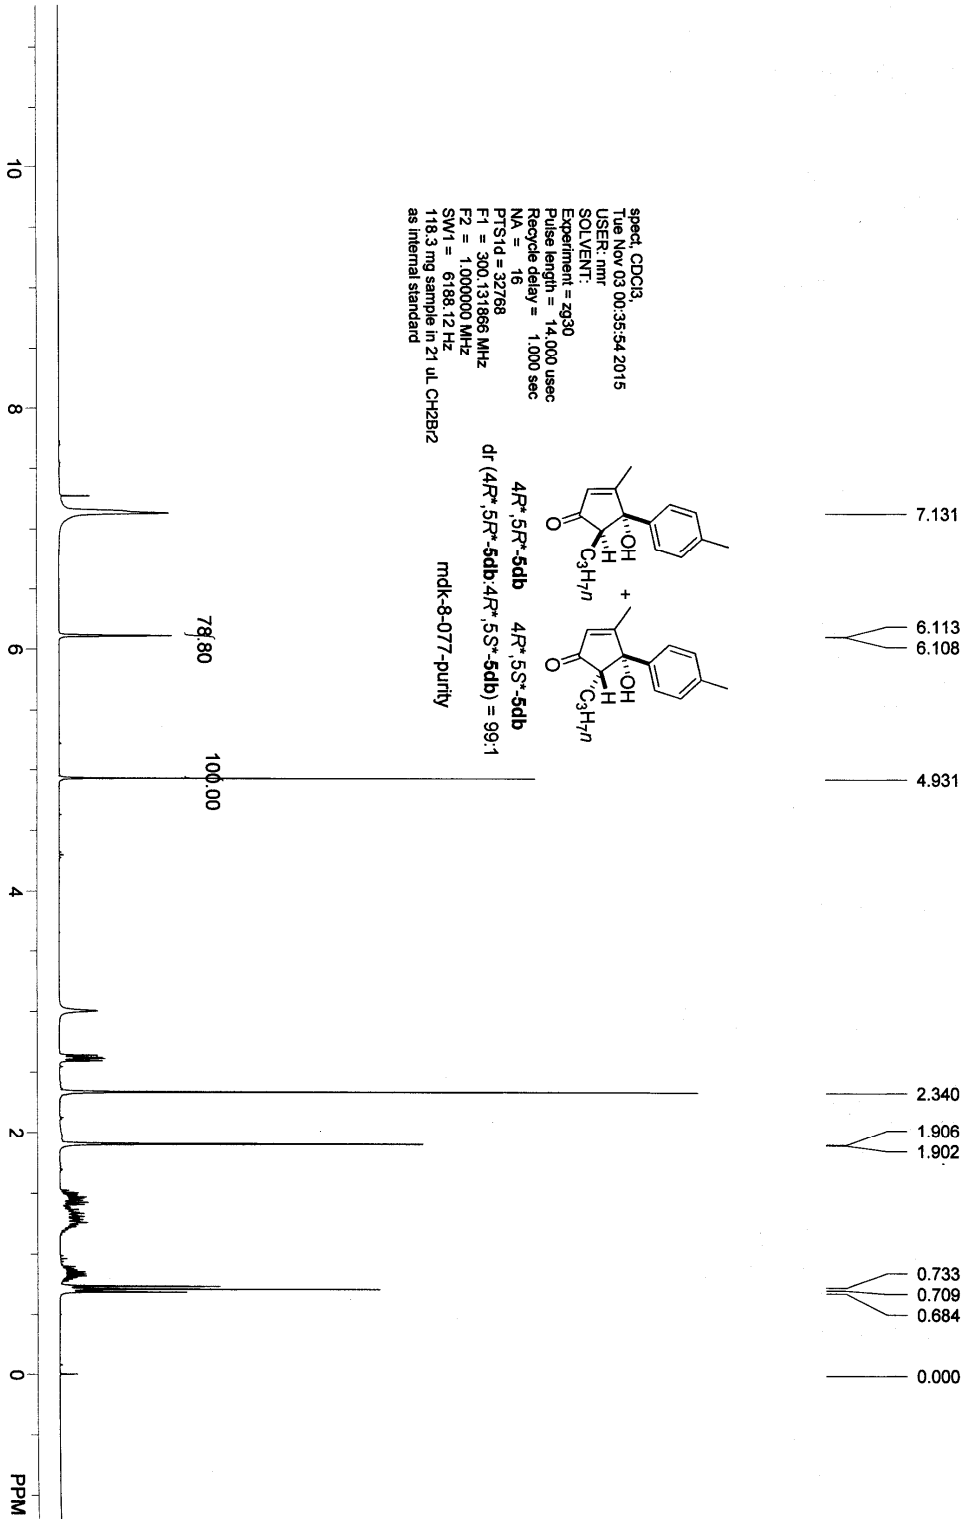

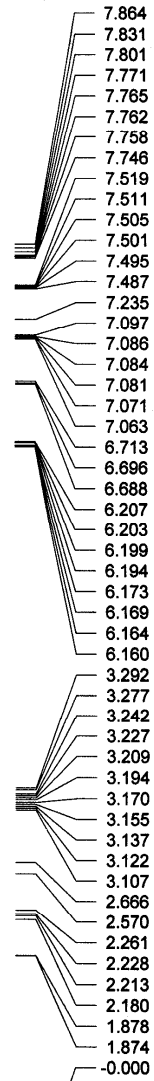

spec1, CDCl3  
TUE Nov 19 06:27:04 2015  
USER: mfr  
SOLVENT:  
Experiment = z930  
Pulse length = 14,000 usec  
Recycle delay = 1,000 sec  
NA = 8  
PTS1d = 32768  
F1 = 300,131866 MHz  
F2 = 1,000000 MHz  
SW1 = 6188.12 Hz

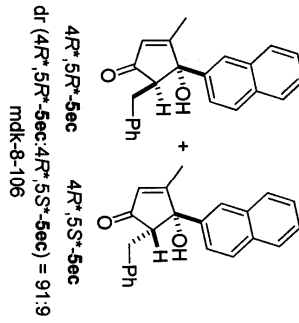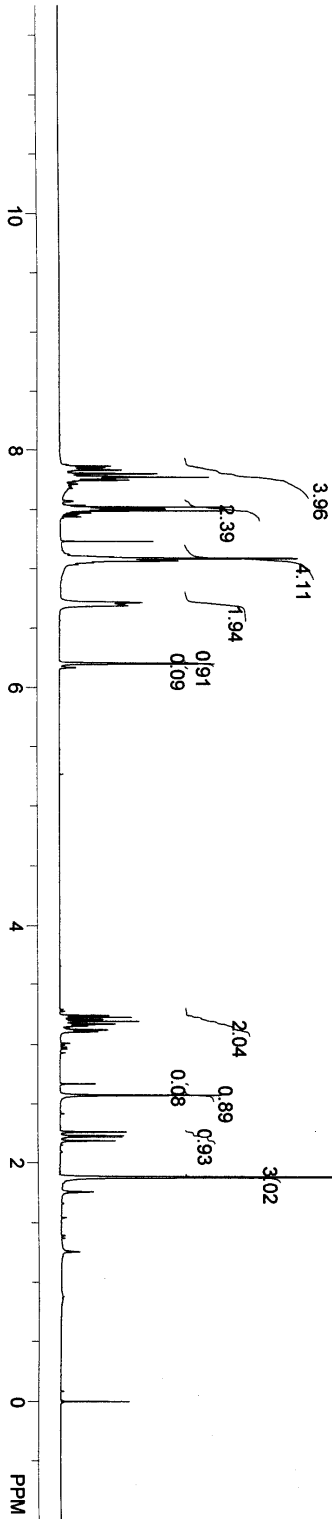

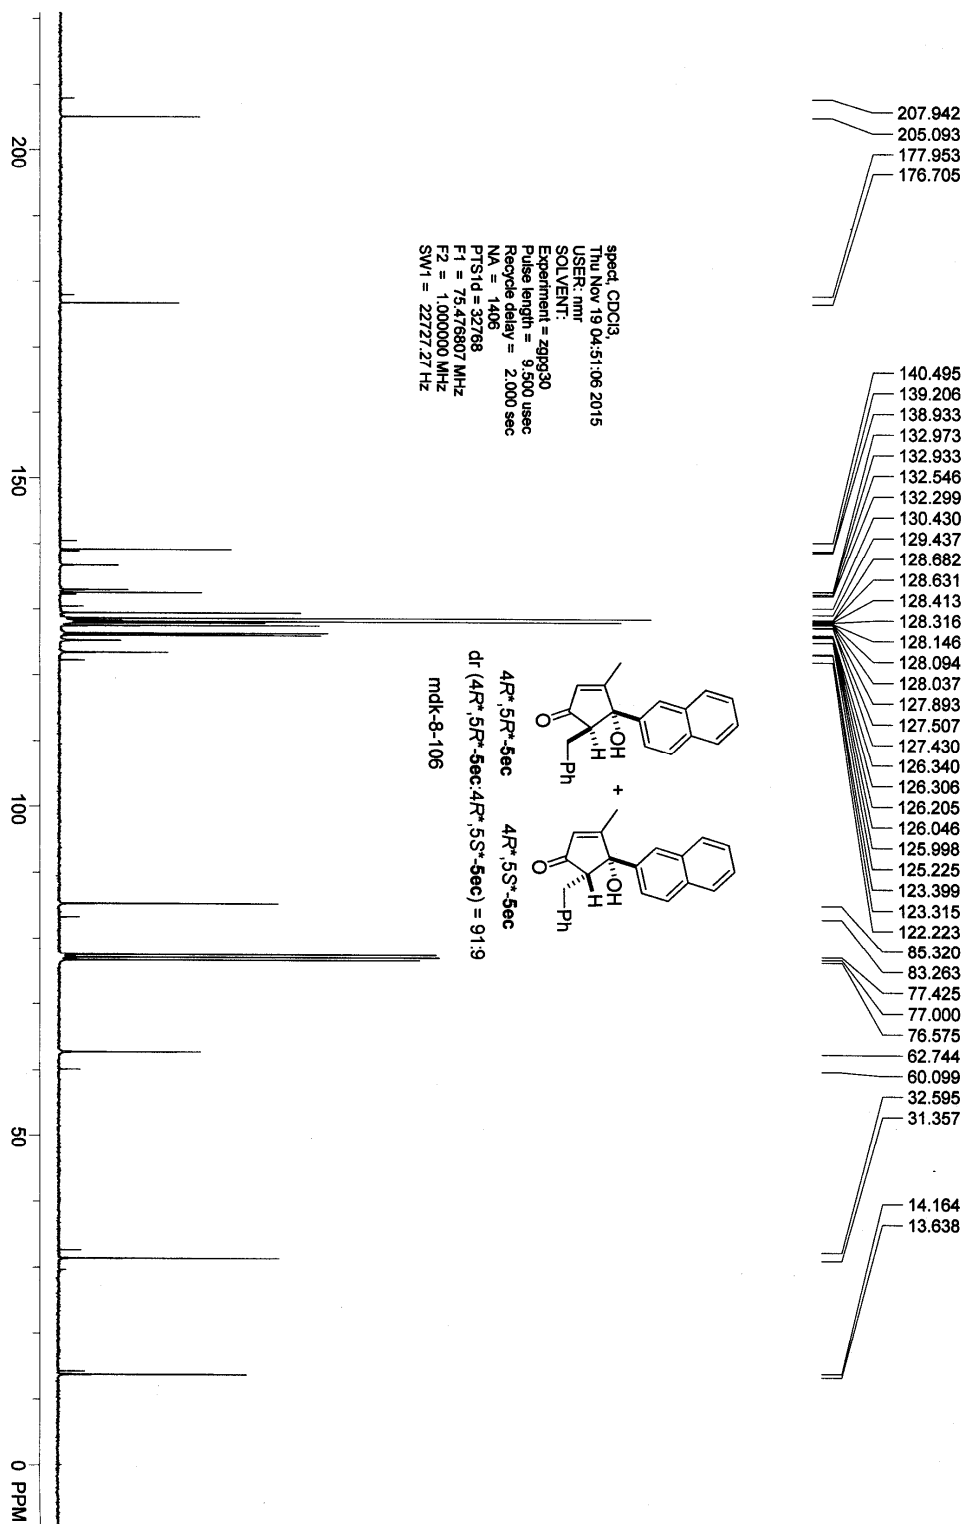

spect: CDCl3  
 Thu Dec 24 01:48:17 2015  
 USER: nmr  
 SOLVENT:  
 Experiment = 2930  
 Pulse length = 14.000 usec  
 Recycle delay = 1.000 sec  
 NA = 8  
 P1Std = 32768  
 F1 = 300.131866 MHz  
 F2 = 1.000000 MHz  
 SW1 = 6188.12 Hz

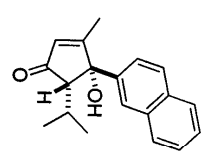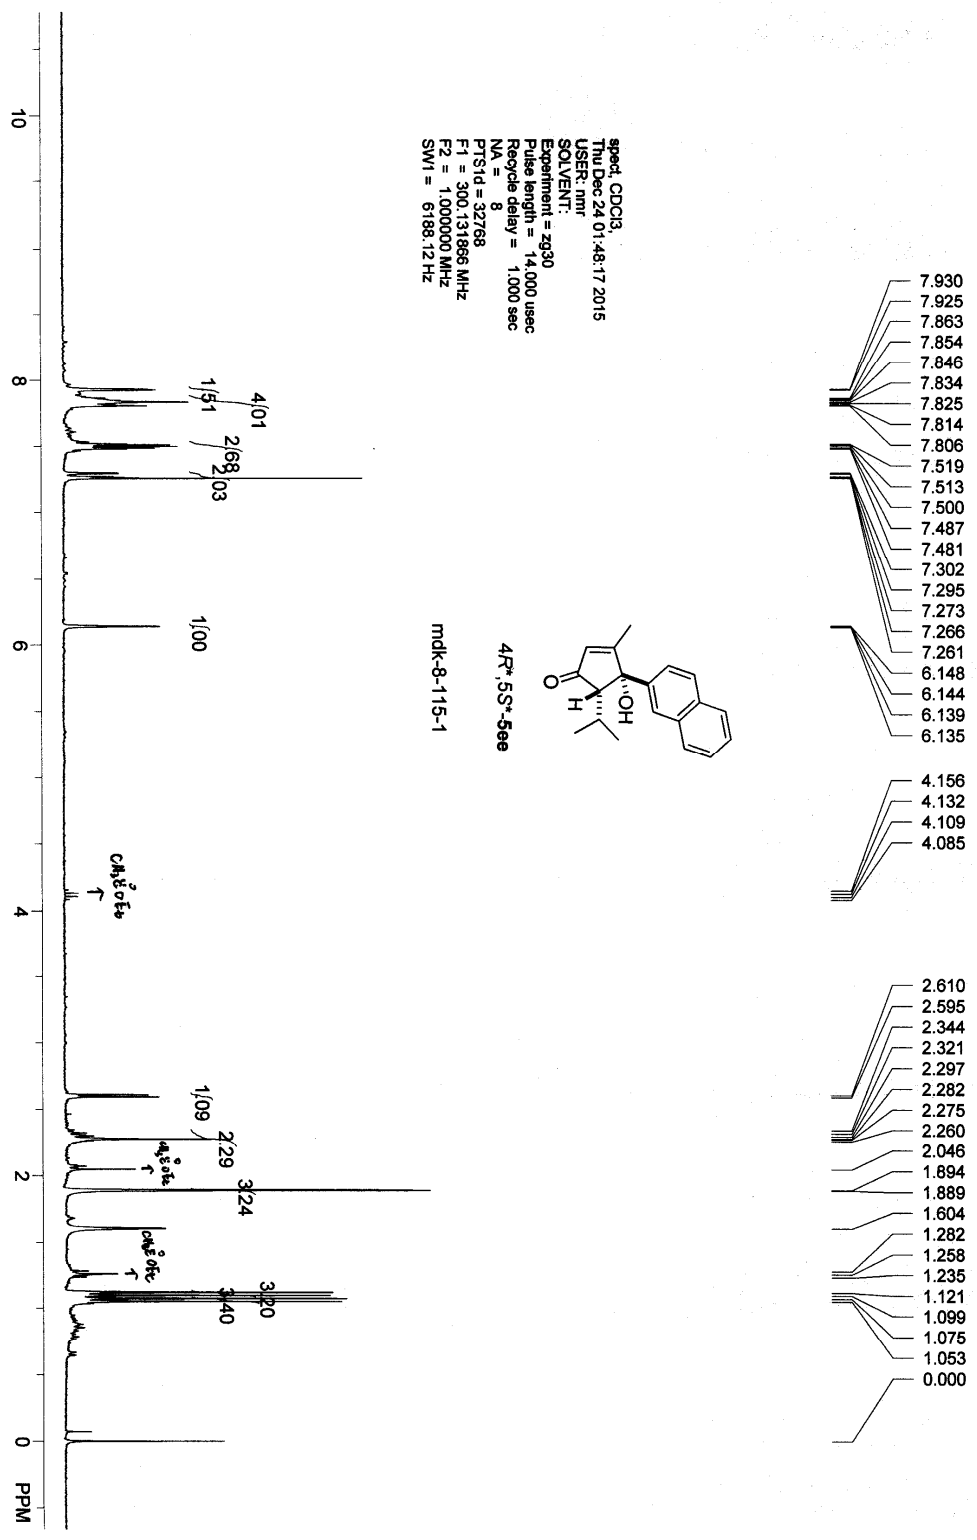



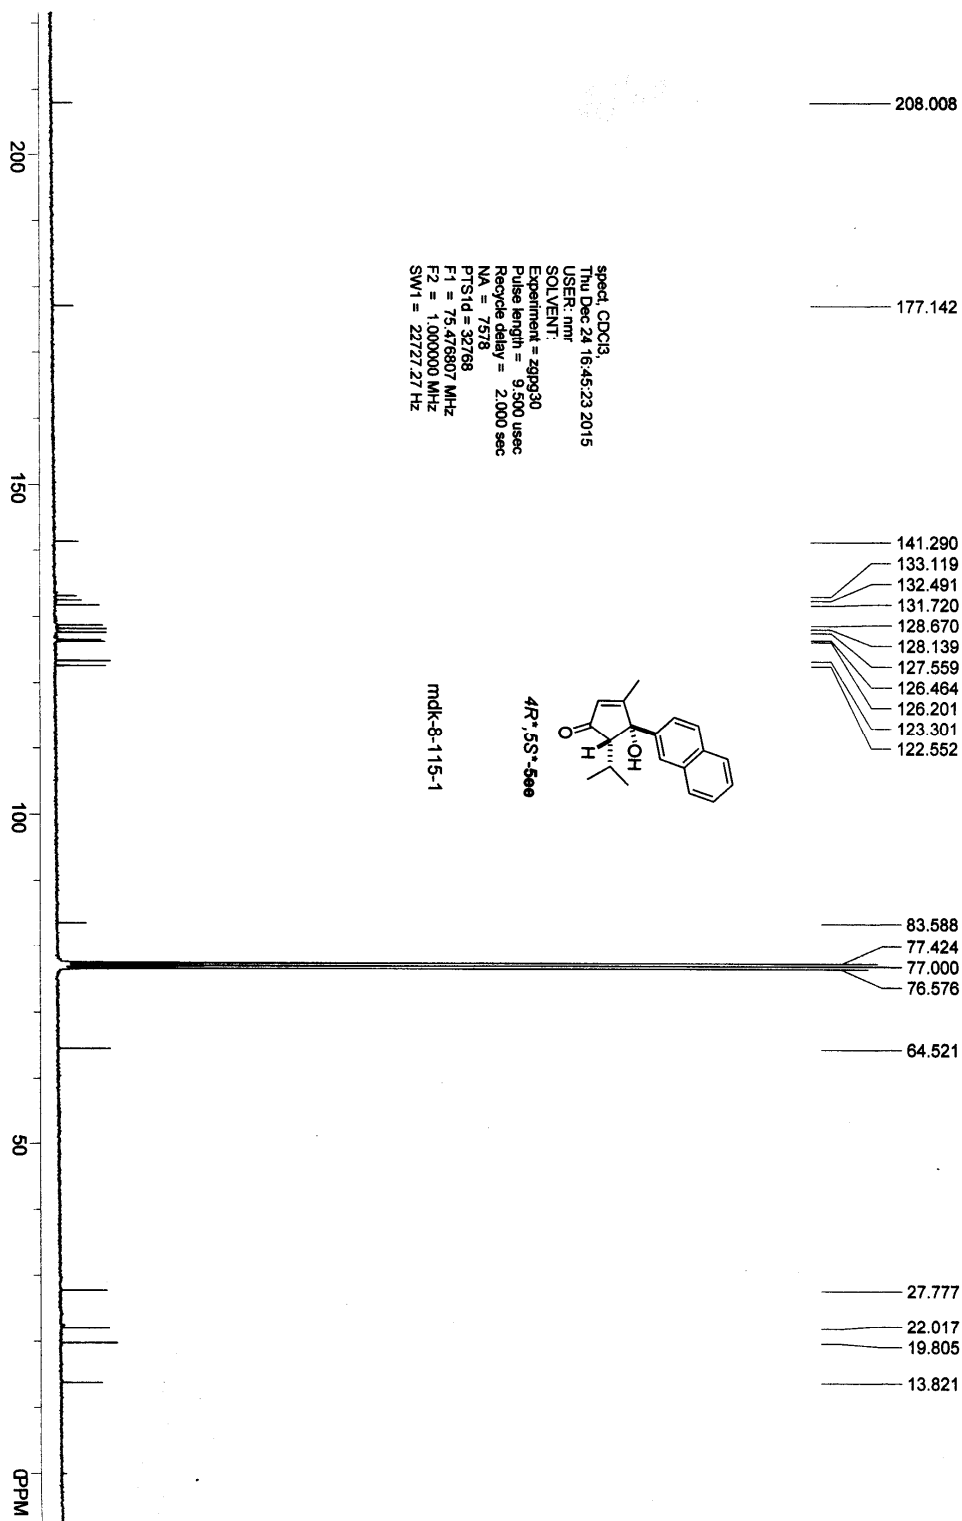

- 7.849
- 7.841
- 7.832
- 7.817
- 7.794
- 7.765
- 7.516
- 7.515
- 7.509
- 7.502
- 7.498
- 7.491
- 7.483
- 7.259
- 6.114
- 6.110
- 6.106
- 6.101

- 2.563
- 2.536
- 2.507
- 1.872
- 1.868
- 1.834
- 1.812
- 1.804
- 1.790
- 1.782
- 1.768
- 1.760
- 1.738
- 1.650
- 1.053
- 1.031
- 0.744
- 0.722
- 0.000

spect: CDCl3  
 Ft Jan 01 01:56:06 2016  
 USER: nmr  
 SOLVENT:  
 Experiment = zg30  
 Pulse length = 14.000 usec  
 Recycle delay = 1.000 sec  
 NA = 8  
 P1 = 300.131866 MHz  
 P2 = 1.000000 MHz  
 SW1 = 6198.12 Hz

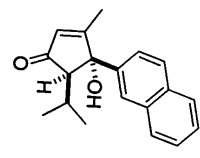

4R\*,5R\*-5ee  
 mdk-8-115-2

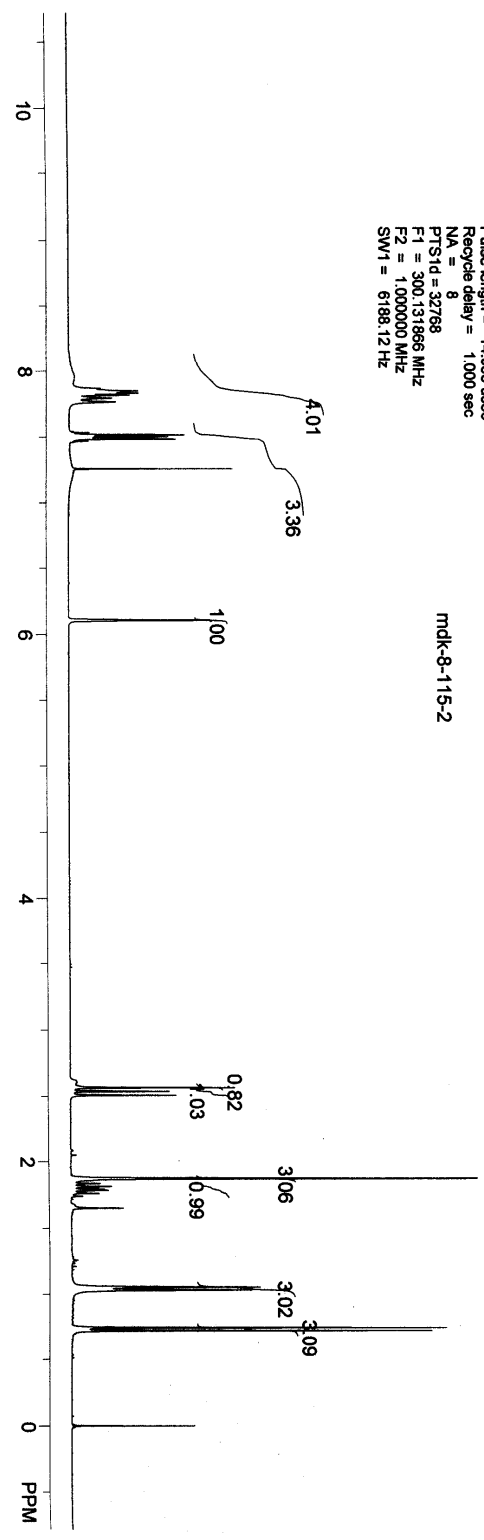

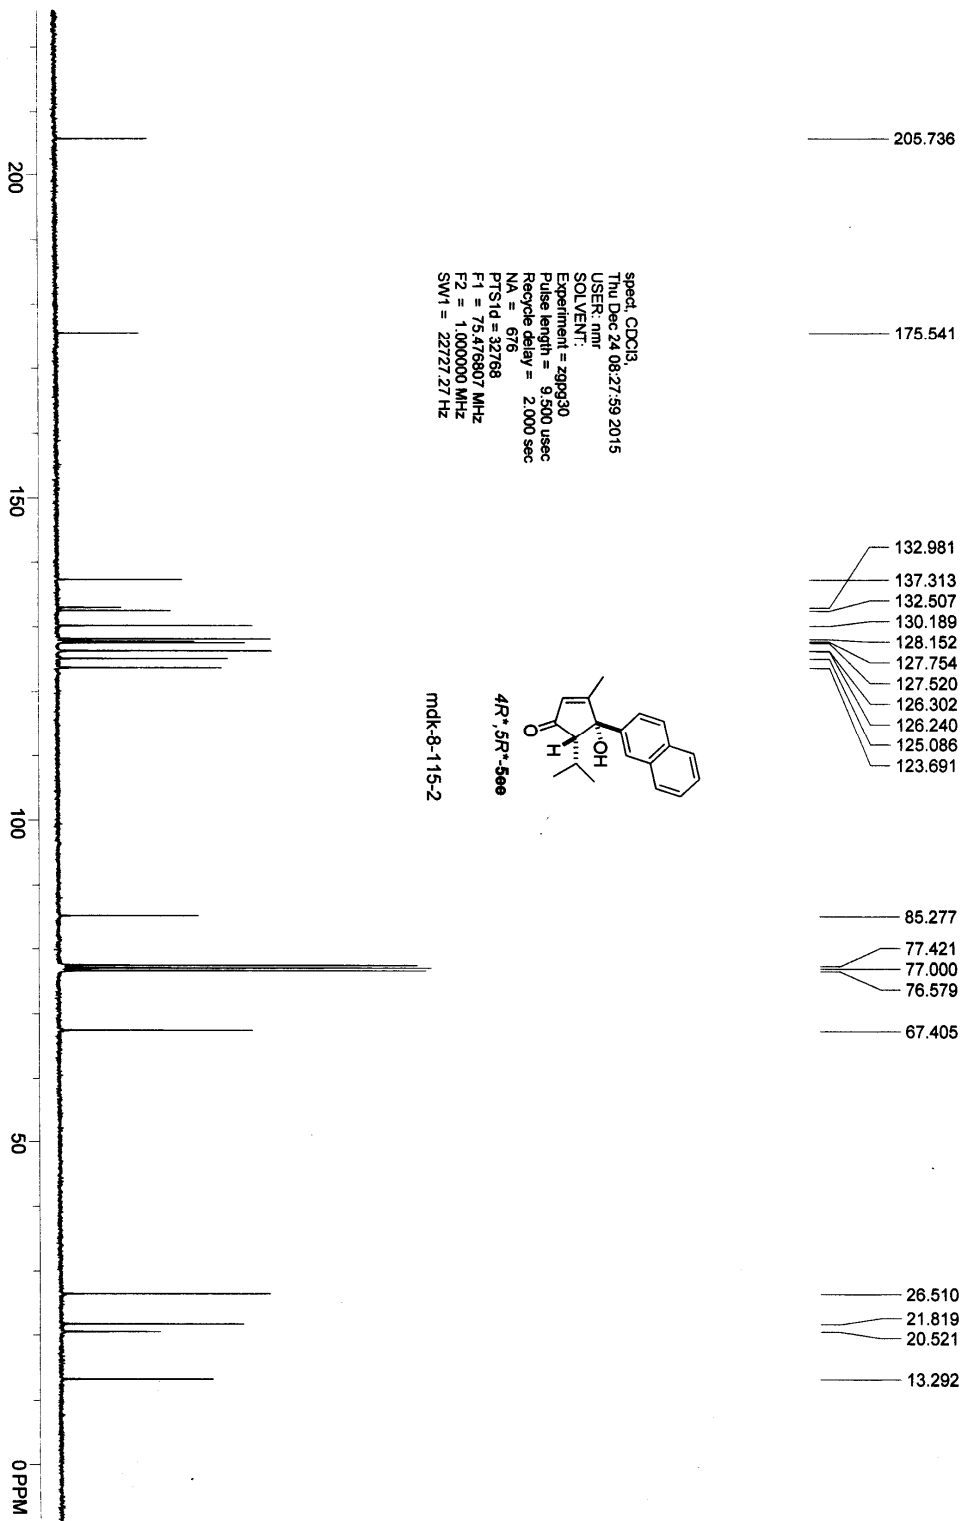

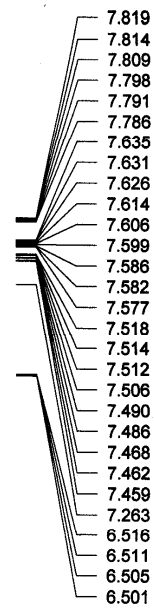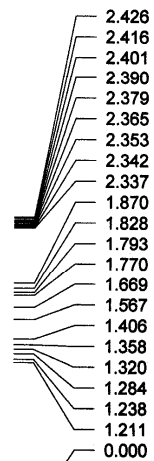

spect, CDCl3  
 Tue Jan 26 16:17:37 2016  
 USER: nmr  
 SOLVENT:  
 Experiment = zg30  
 Pulse length = 14.000 usec  
 Recycle delay = 1.000 sec  
 NA = 8  
 P1 = 300.131866 MHz  
 P2 = 1.000000 MHz  
 SWH = 6188.12 Hz

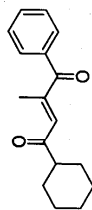

mdk-9-010-1

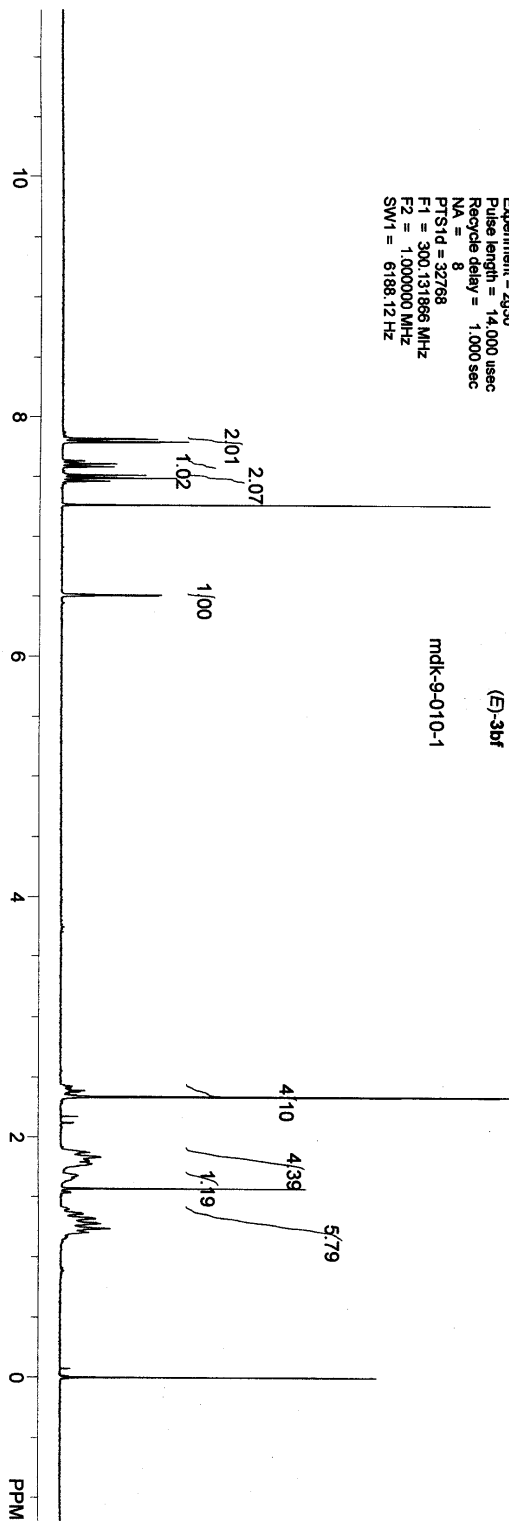

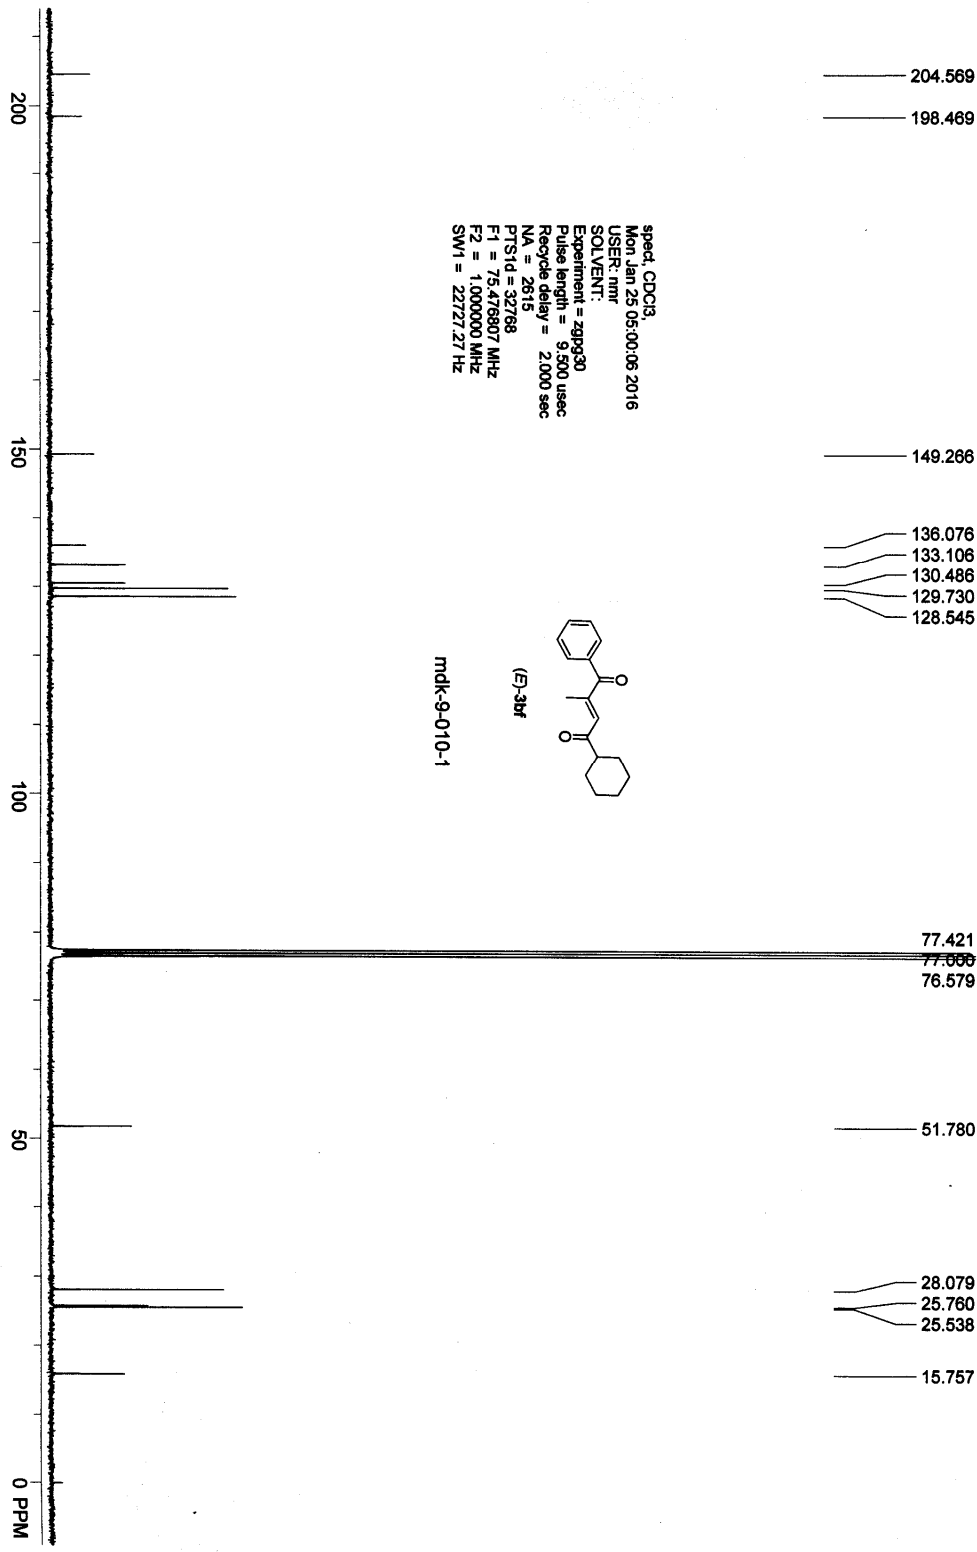

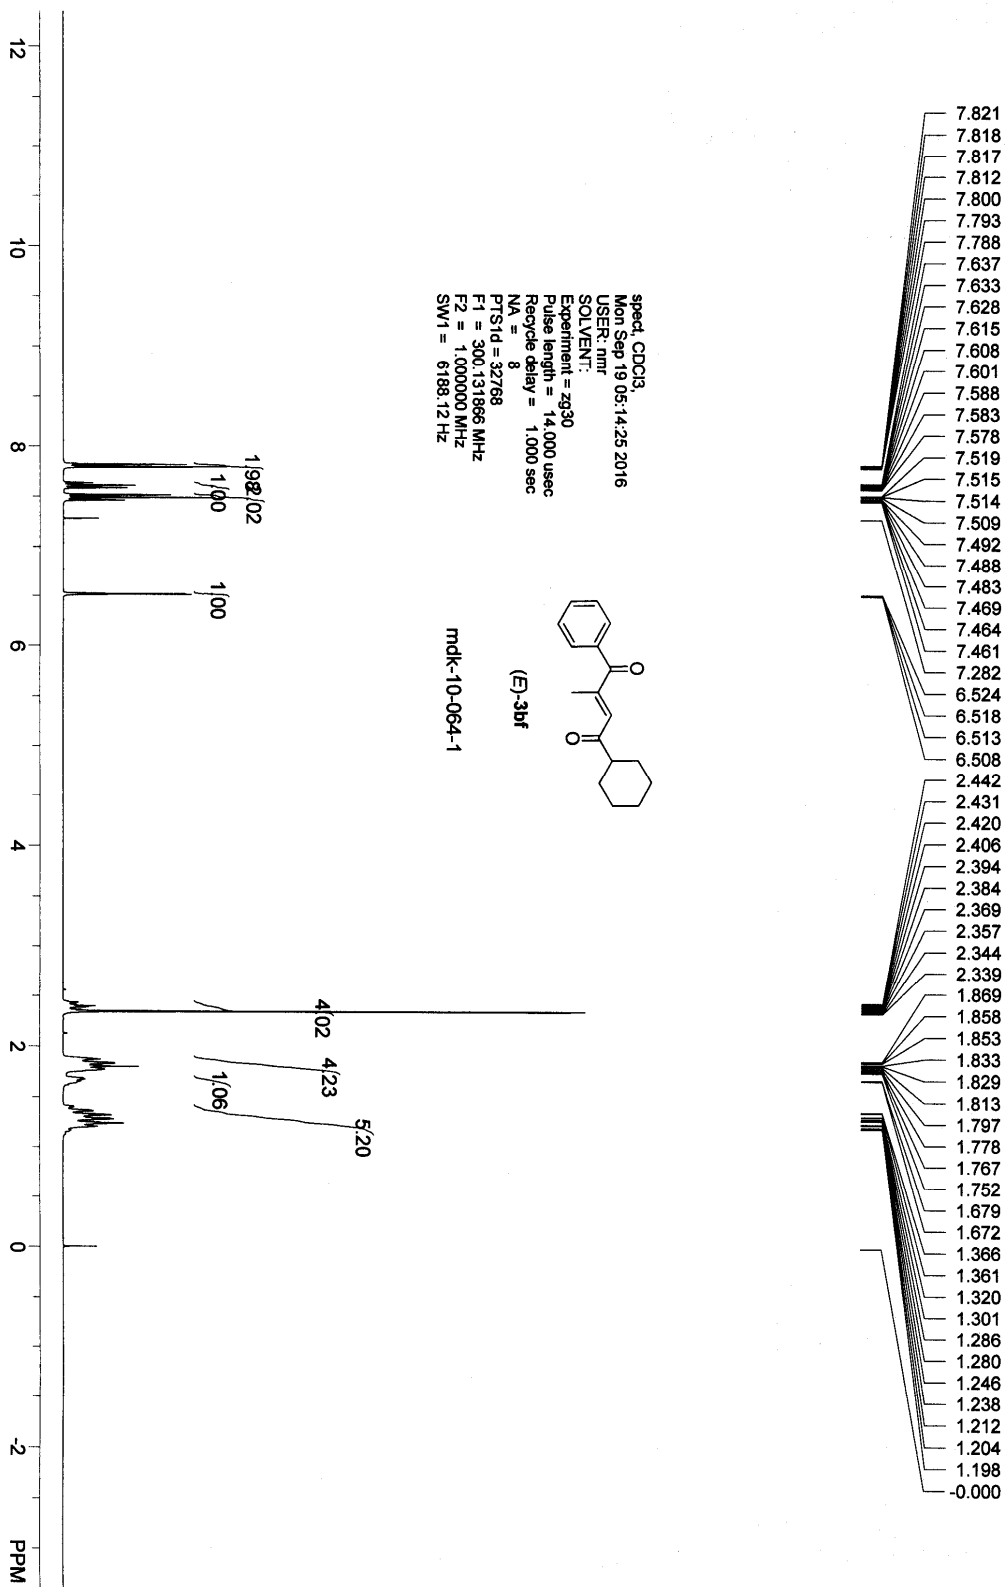

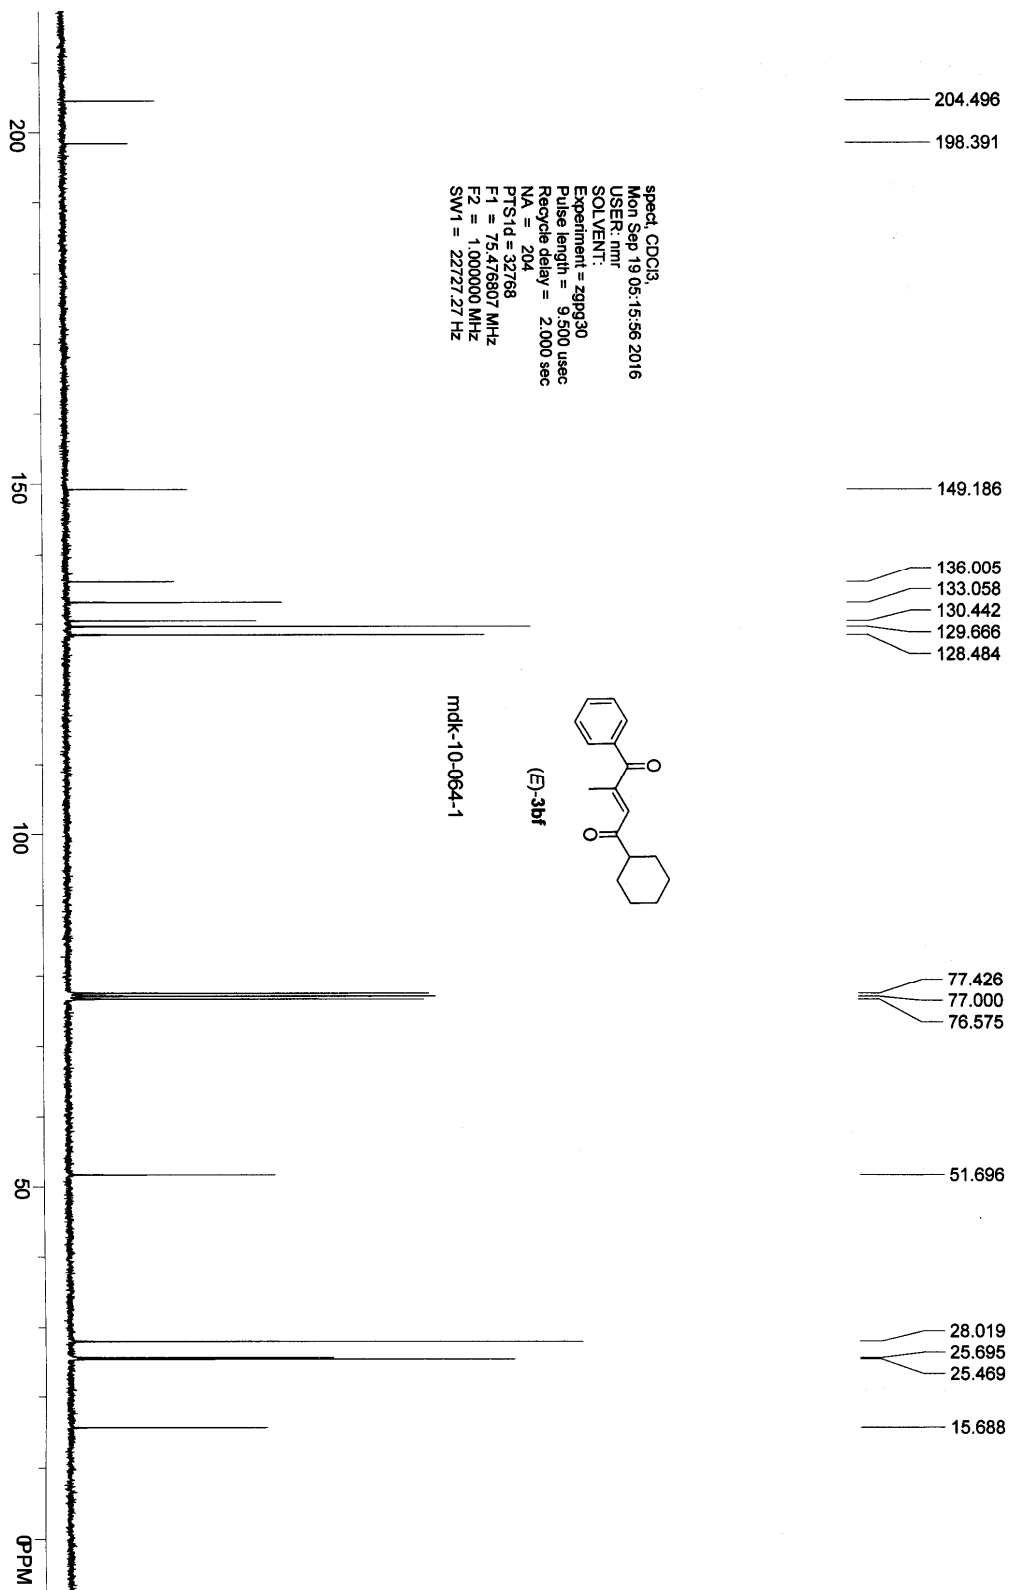

mdk-10-064-1-noe

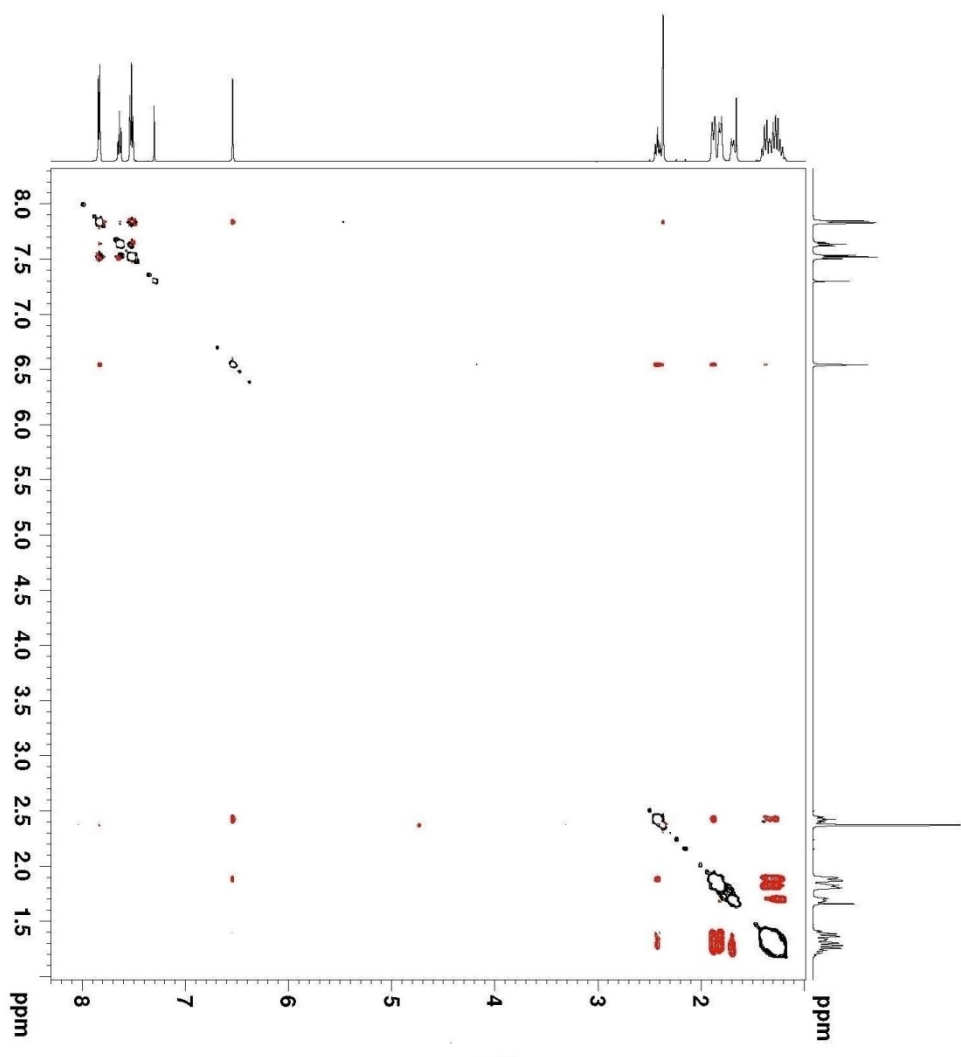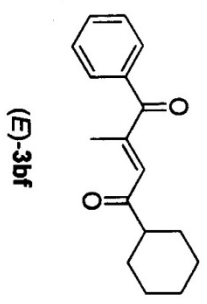



mdk-10-064-1-noc

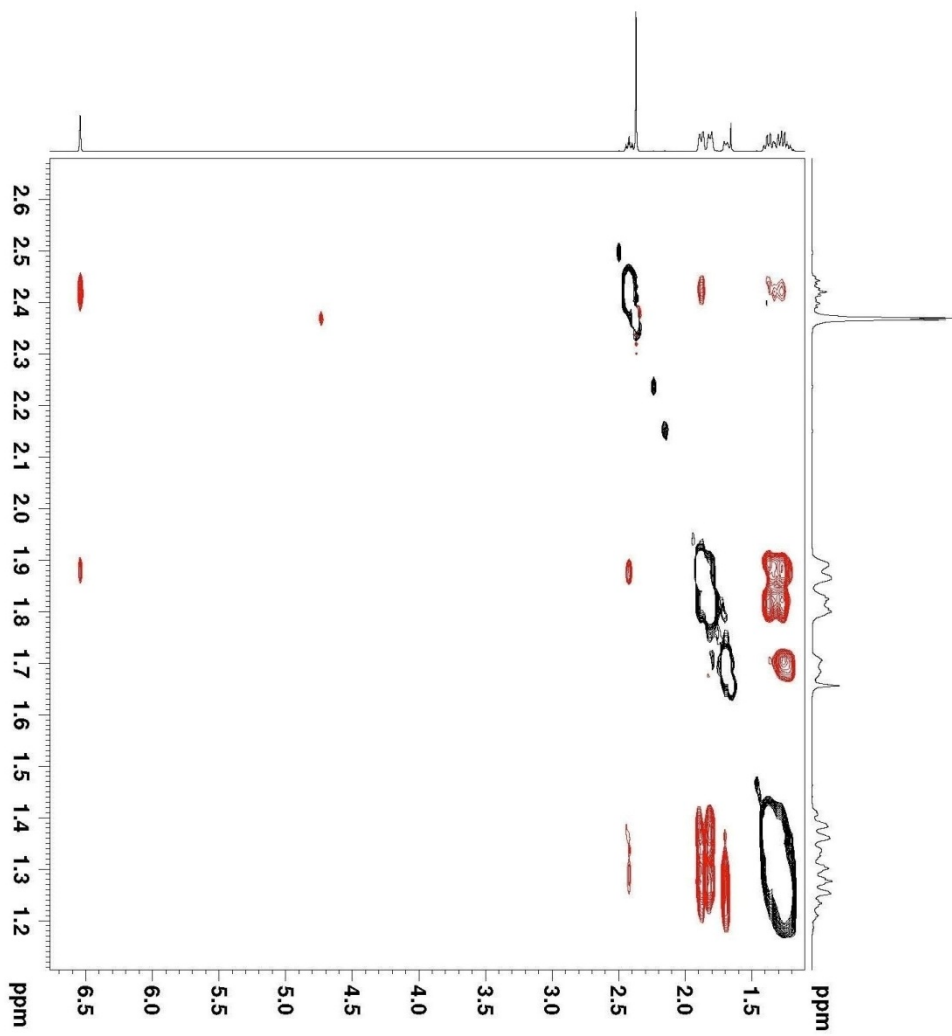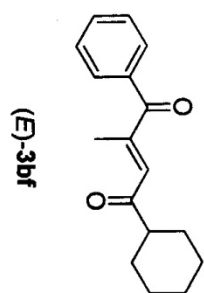

mdk-10-064-1-noc

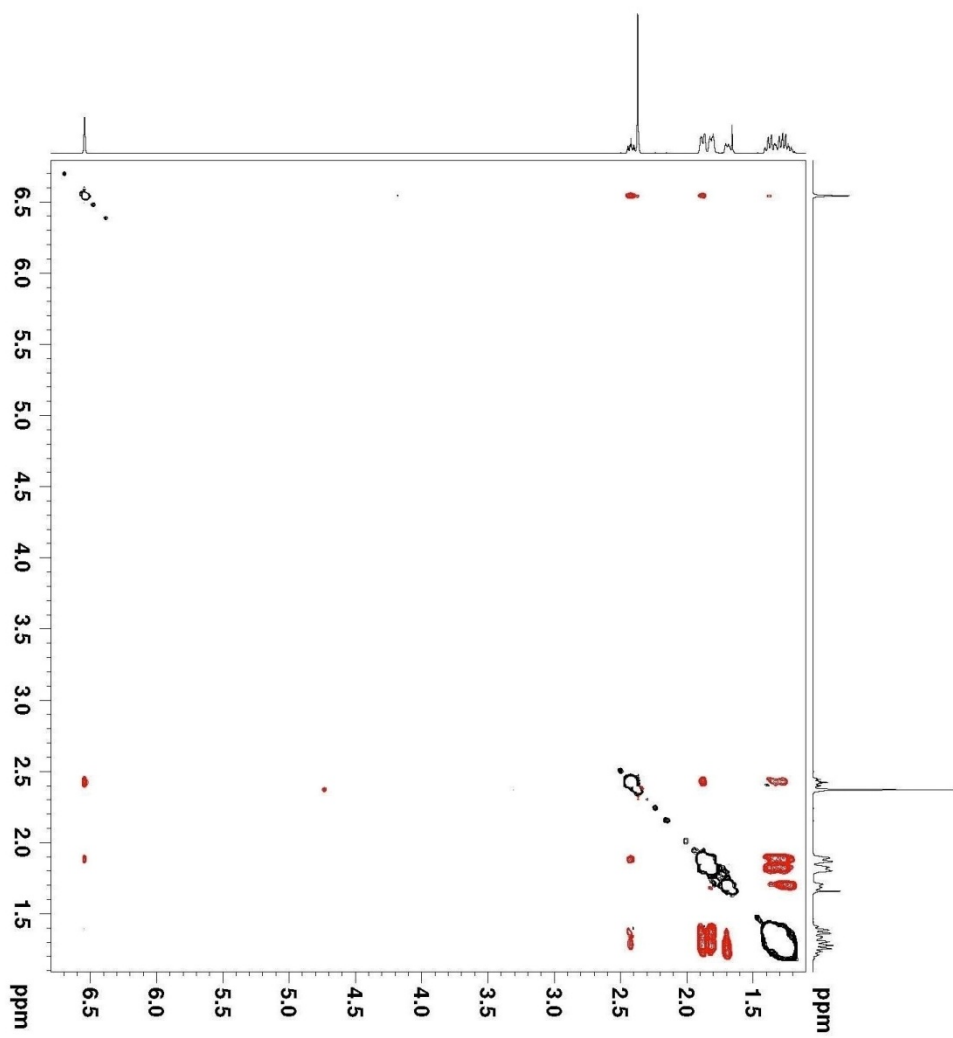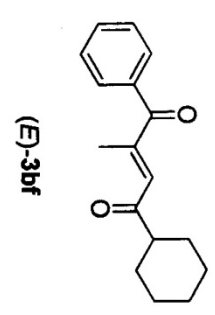

- 7.846
- 7.842
- 7.837
- 7.826
- 7.819
- 7.814
- 7.571
- 7.567
- 7.562
- 7.550
- 7.542
- 7.534
- 7.522
- 7.517
- 7.513
- 7.463
- 7.458
- 7.442
- 7.437
- 7.414
- 7.411
- 7.263
- 5.895
- 5.892
- 5.766
- 3.676
- 3.675
- 2.506
- 2.494
- 2.469
- 2.458
- 2.432
- 2.419
- 1.941
- 1.936
- 1.908
- 1.812
- 1.803
- 1.783
- 1.775
- 1.691
- 1.655
- 1.577
- 1.393
- 1.359
- 1.335
- 1.333
- 1.318
- 1.309
- 1.284
- 1.276
- 1.268
- 1.253
- 1.244
- 1.237
- 1.222
- 0.000

speed, CDCl3  
 F1 Jan 15 01:52:52 2016  
 USER: nmf  
 SOLVENT:  
 Experiment = zg30  
 Pulse length = 14.000 usec  
 Recycle delay = 1.000 sec  
 NA = 8  
 P1 = 32768  
 P1SID = 32768  
 F1 = 300.131866 MHz  
 F2 = 1.000000 MHz  
 SWH = 6188.12 Hz

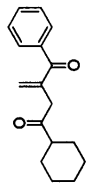

mdk-9-010-2

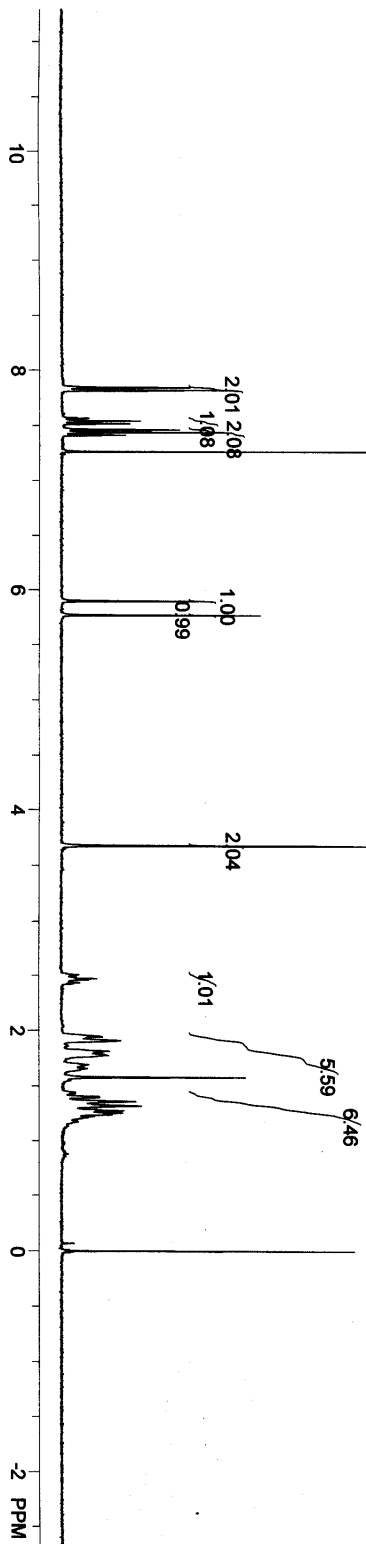

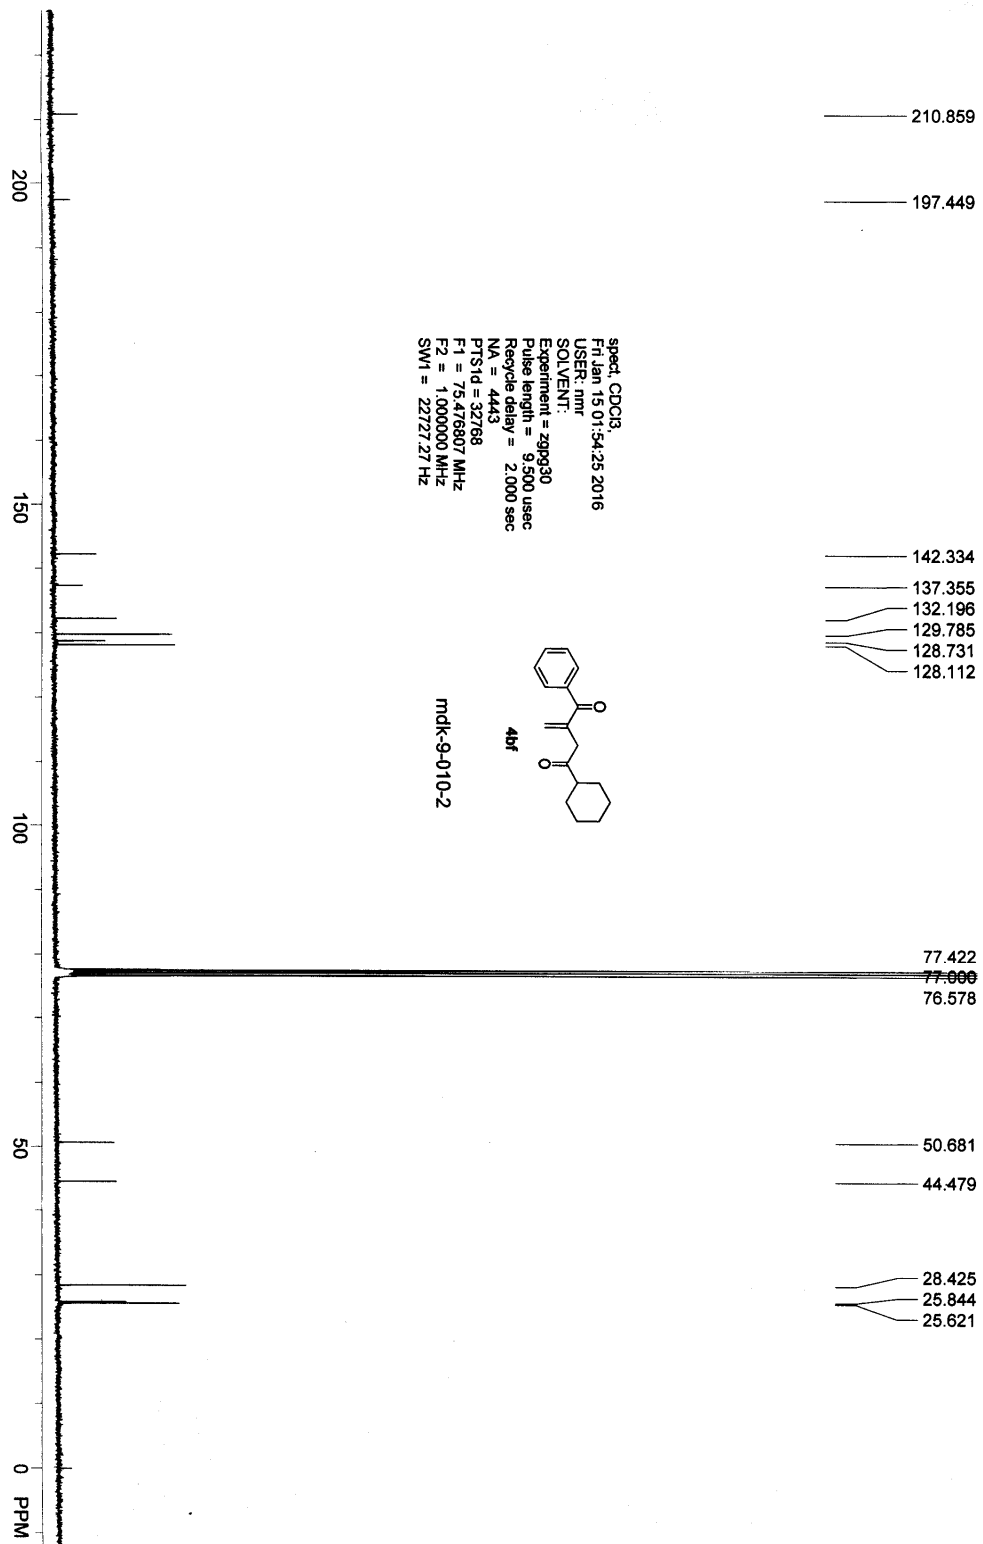

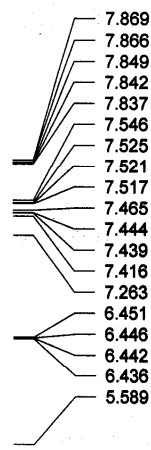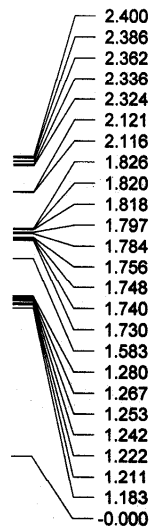

speed, CDCl3,  
 Mon Jan 18 13:04:35 2016  
 USER: nmr  
 SOLVENT:  
 Experiment = z930  
 Pulse length = 14.000 usec  
 Recycle delay = 1.000 sec  
 NA = 8  
 P1/STd = 32/88  
 F1 = 300.131886 MHz  
 F2 = 1.000000 MHz  
 SWH = 6188.12 Hz

mdk-9-010-3

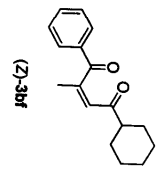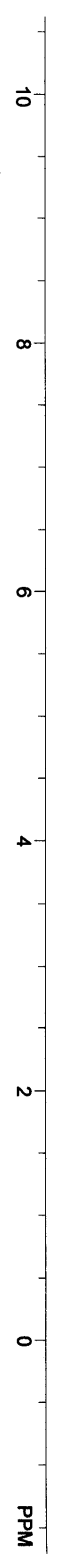

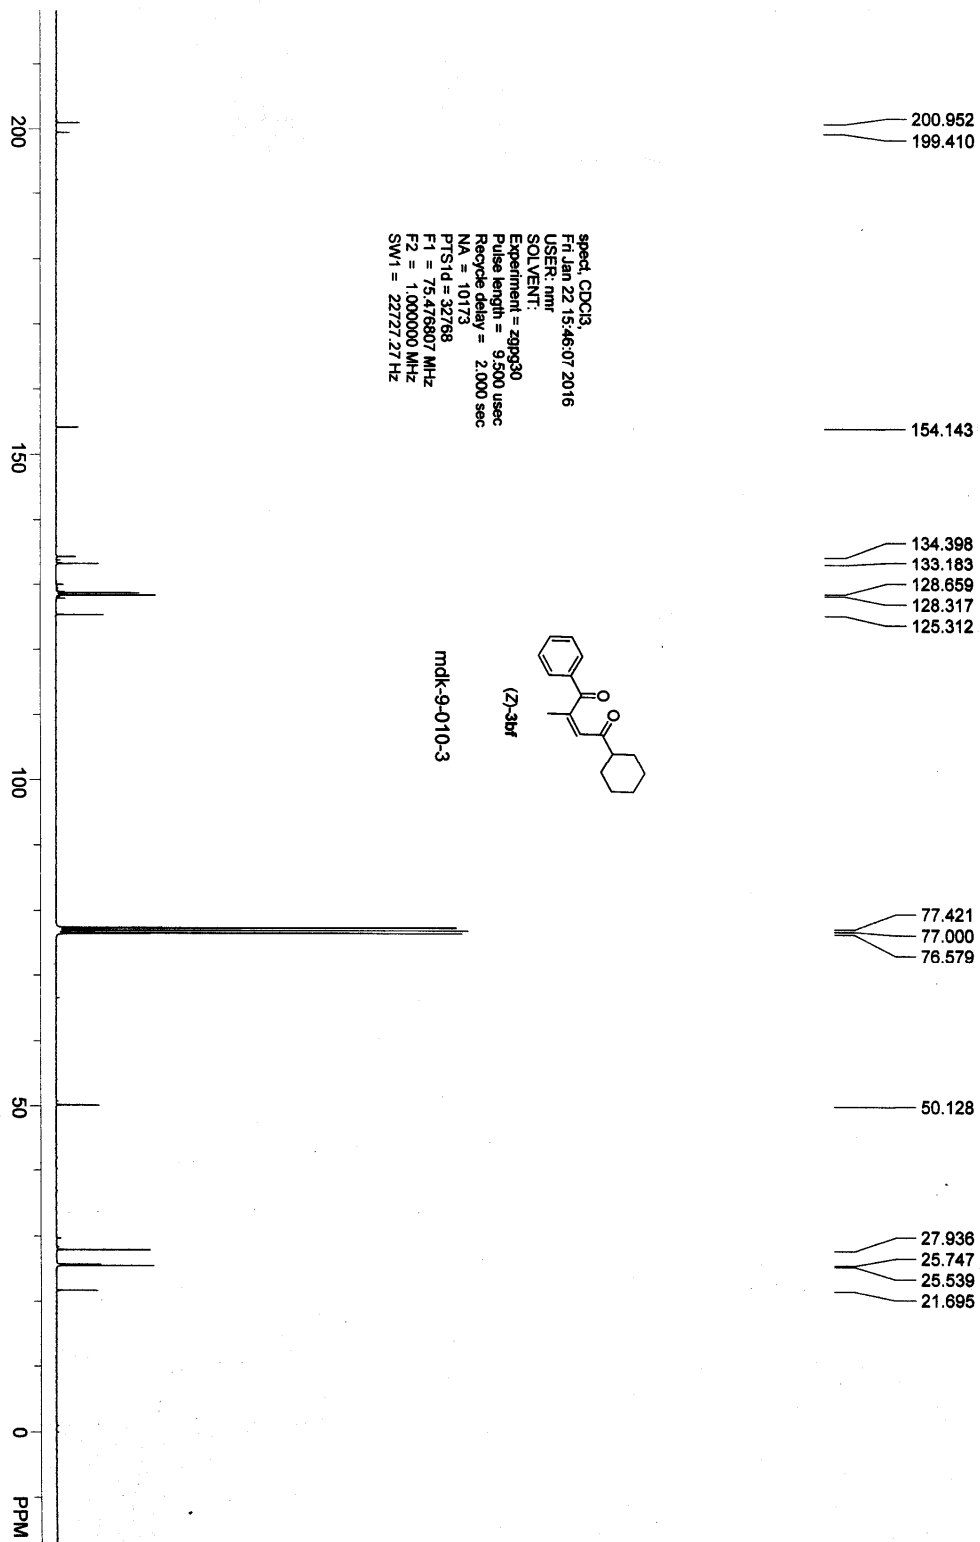

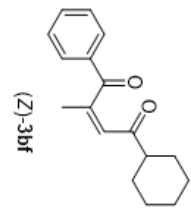

mkf-9-010-3-npe 2 1 C:\COSY\Bartelr

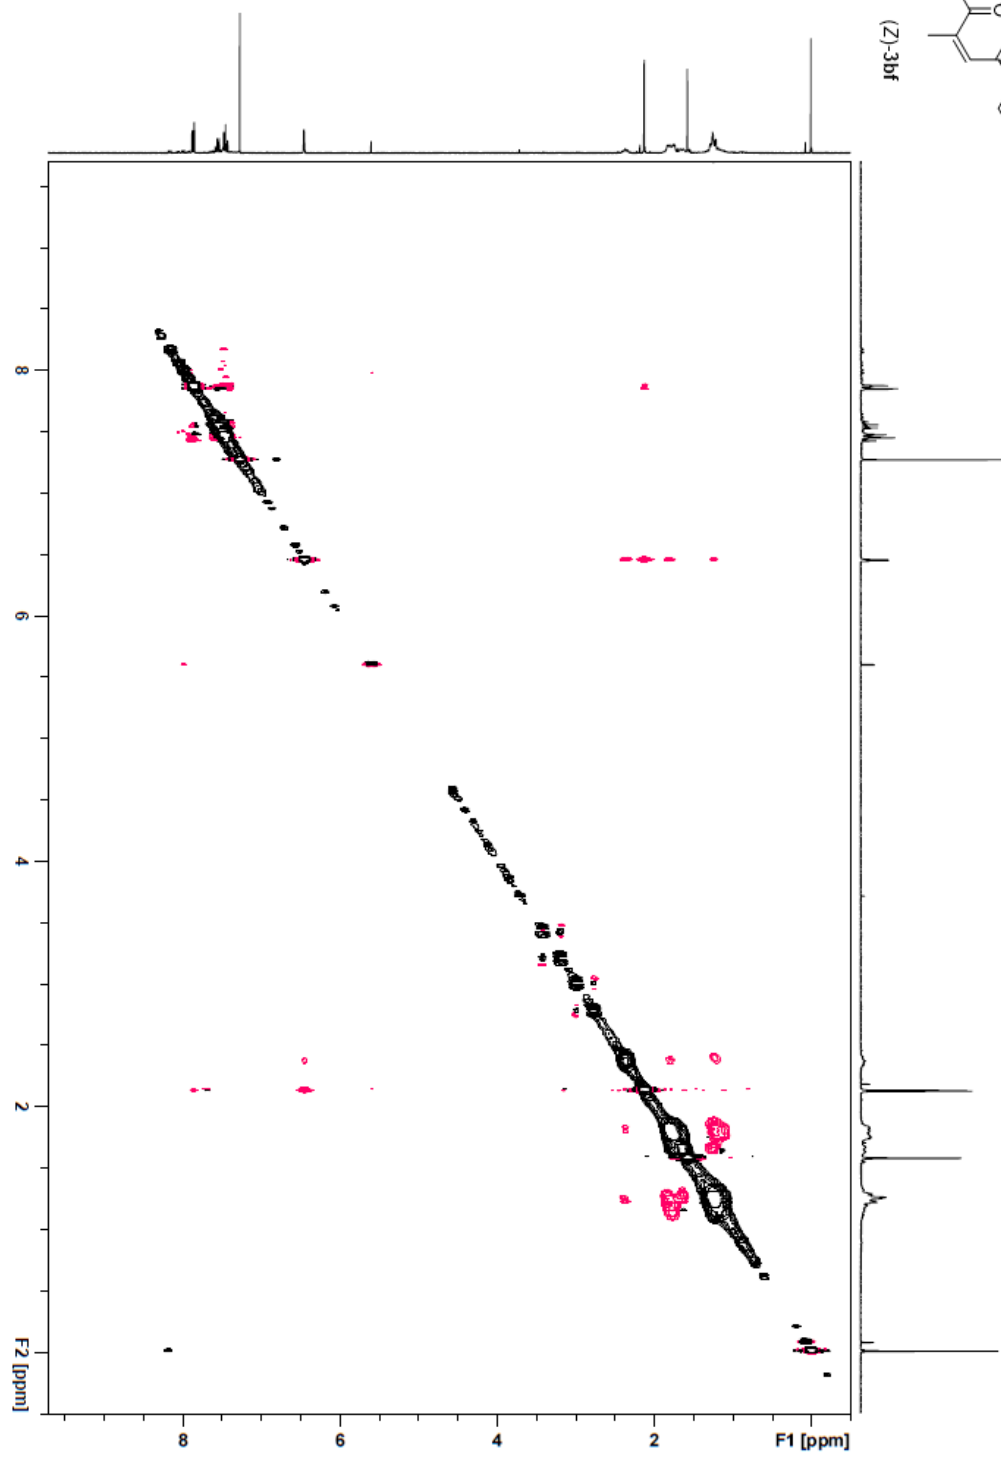

speed: CDCl3  
 Wed Sep 14 05:13:02 2016  
 USER: mh  
 SOLVENT:  
 Experiment = z930  
 Pulse length = 14.000 usec  
 Recycle delay = 1.000 sec  
 NA = 8  
 PTS1d = 32768  
 F1 = 300.131866 MHz  
 F2 = 1.000000 MHz  
 SWH = 6188.12 Hz

mdk-9-010-4

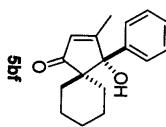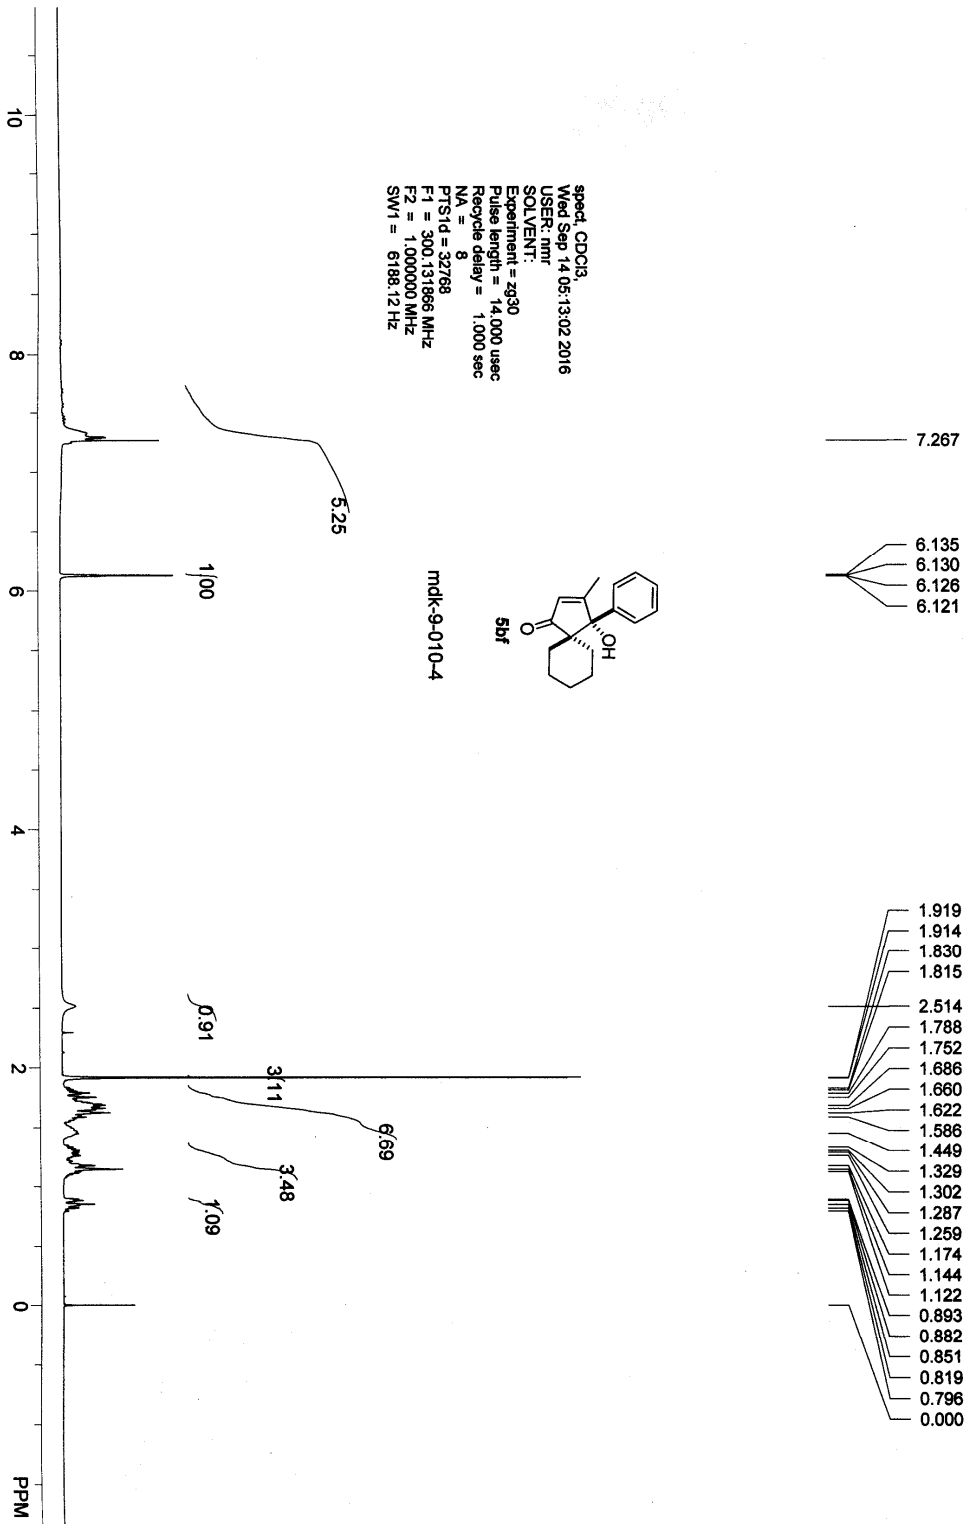



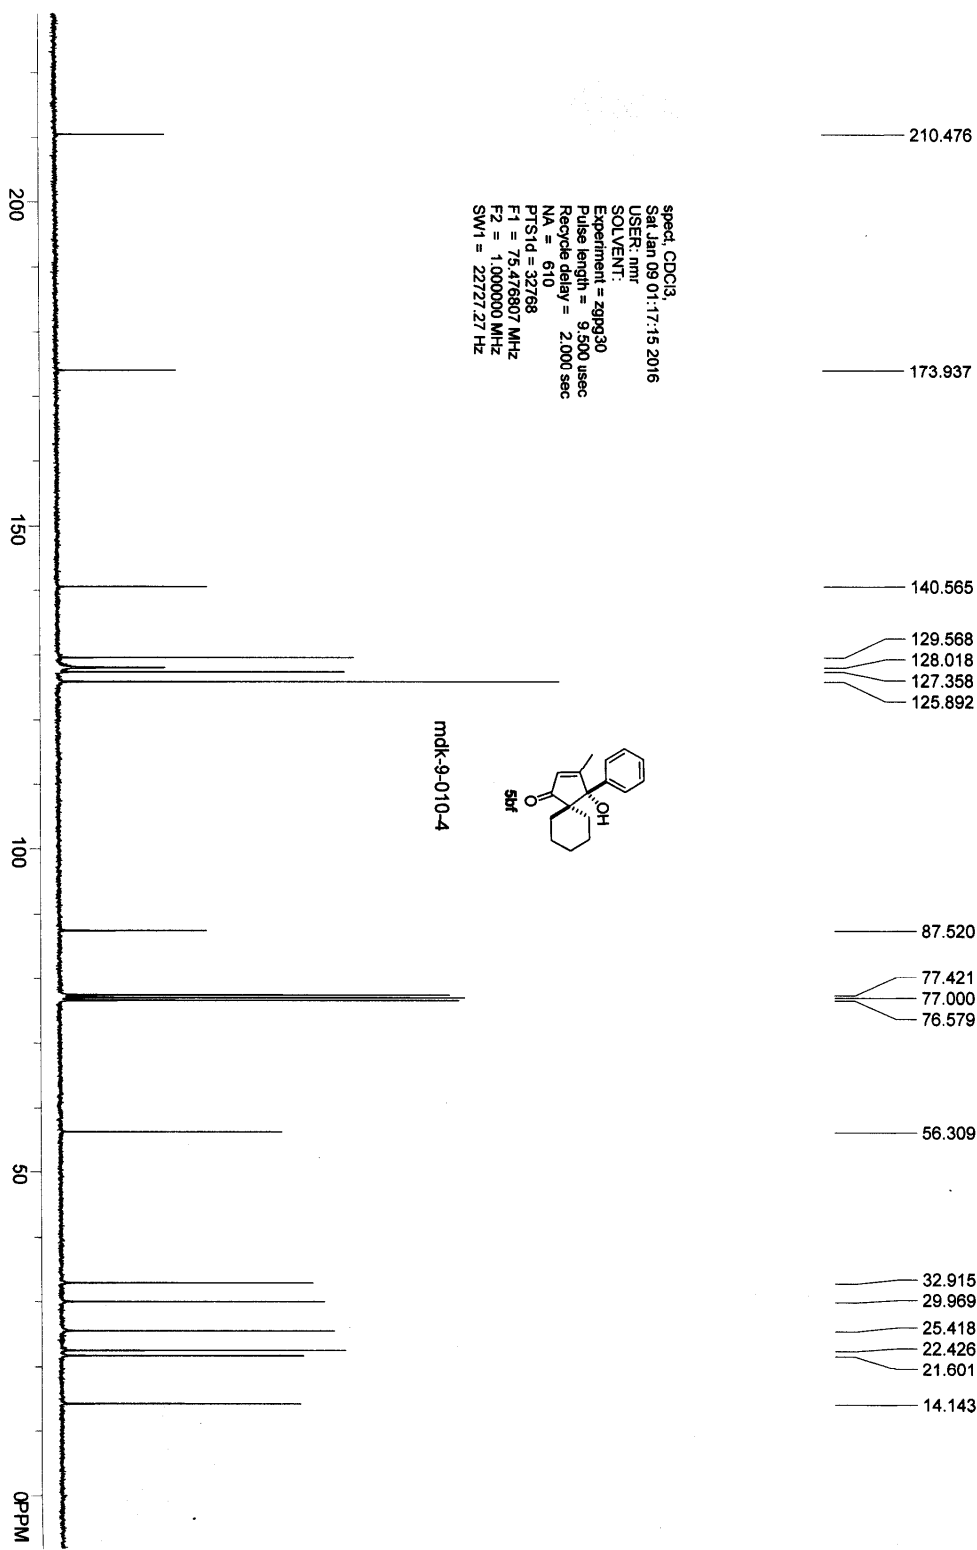

spect: CDCl3  
 Thu Jun 16 05:01:52 2016  
 USER: nmr  
 SOLVENT:  
 Experiment = 2930  
 Pulse length = 14.000 usec  
 Recycle delay = 1.000 sec  
 NA = 8  
 PTStd = 32768  
 F1 = 300.131866 MHz  
 F2 = 1.000000 MHz  
 SW1 = 6188.12 Hz

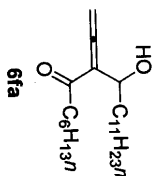

mdk-10-039

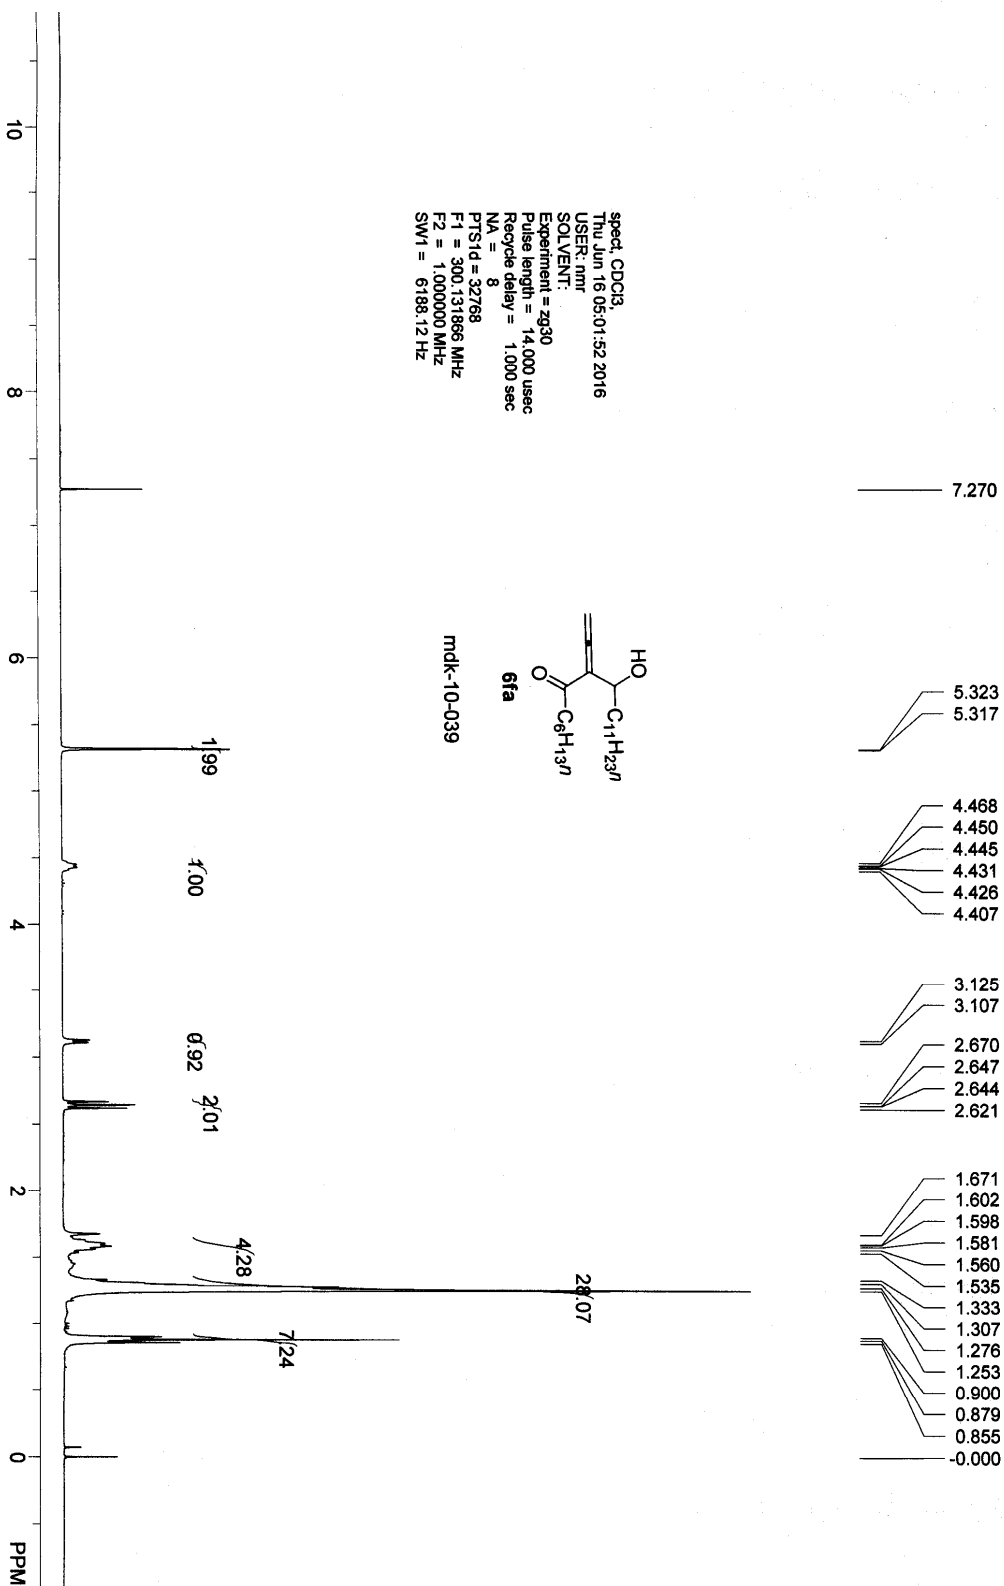

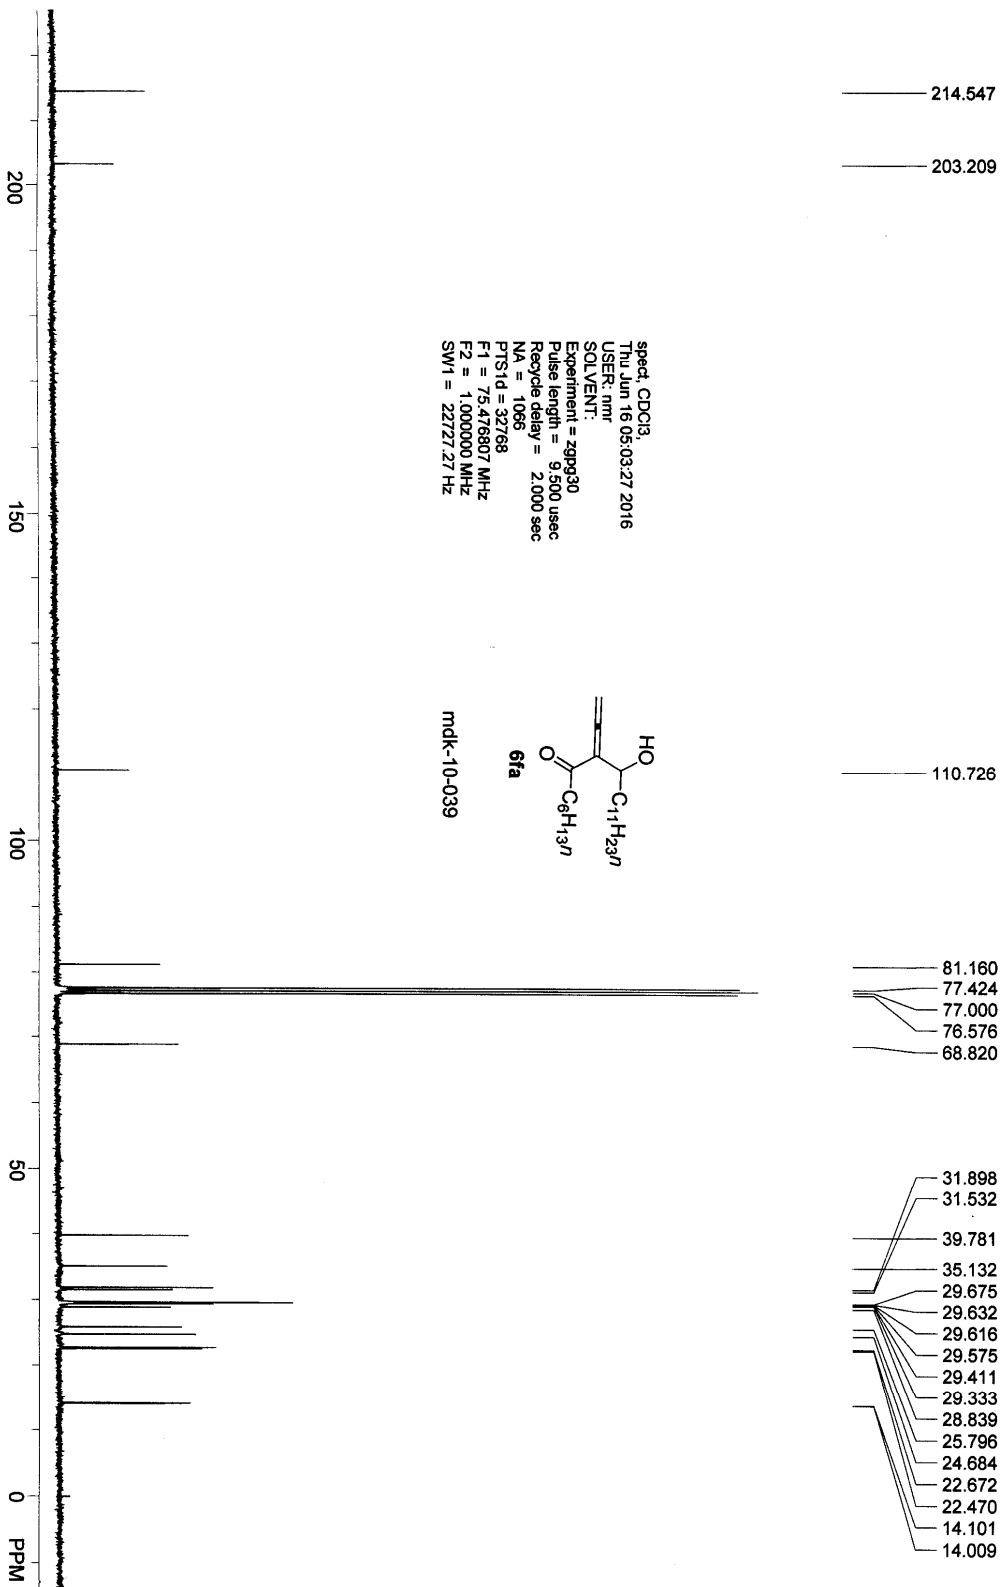



spect: CDCl3  
 Mon Jun 06 07:38:42 2016  
 USER: mtr  
 SOLVENT:  
 Experiment = z330  
 Pulse length = 14,000 usec  
 Recycle delay = 1,000 sec  
 NA = 8  
 P1 = 32768  
 F1 = 300.131866 MHz  
 F2 = 1,000,000 MHz  
 SW1 = 6188.12 Hz

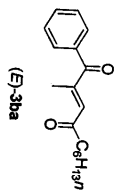

mdk-10-022-1

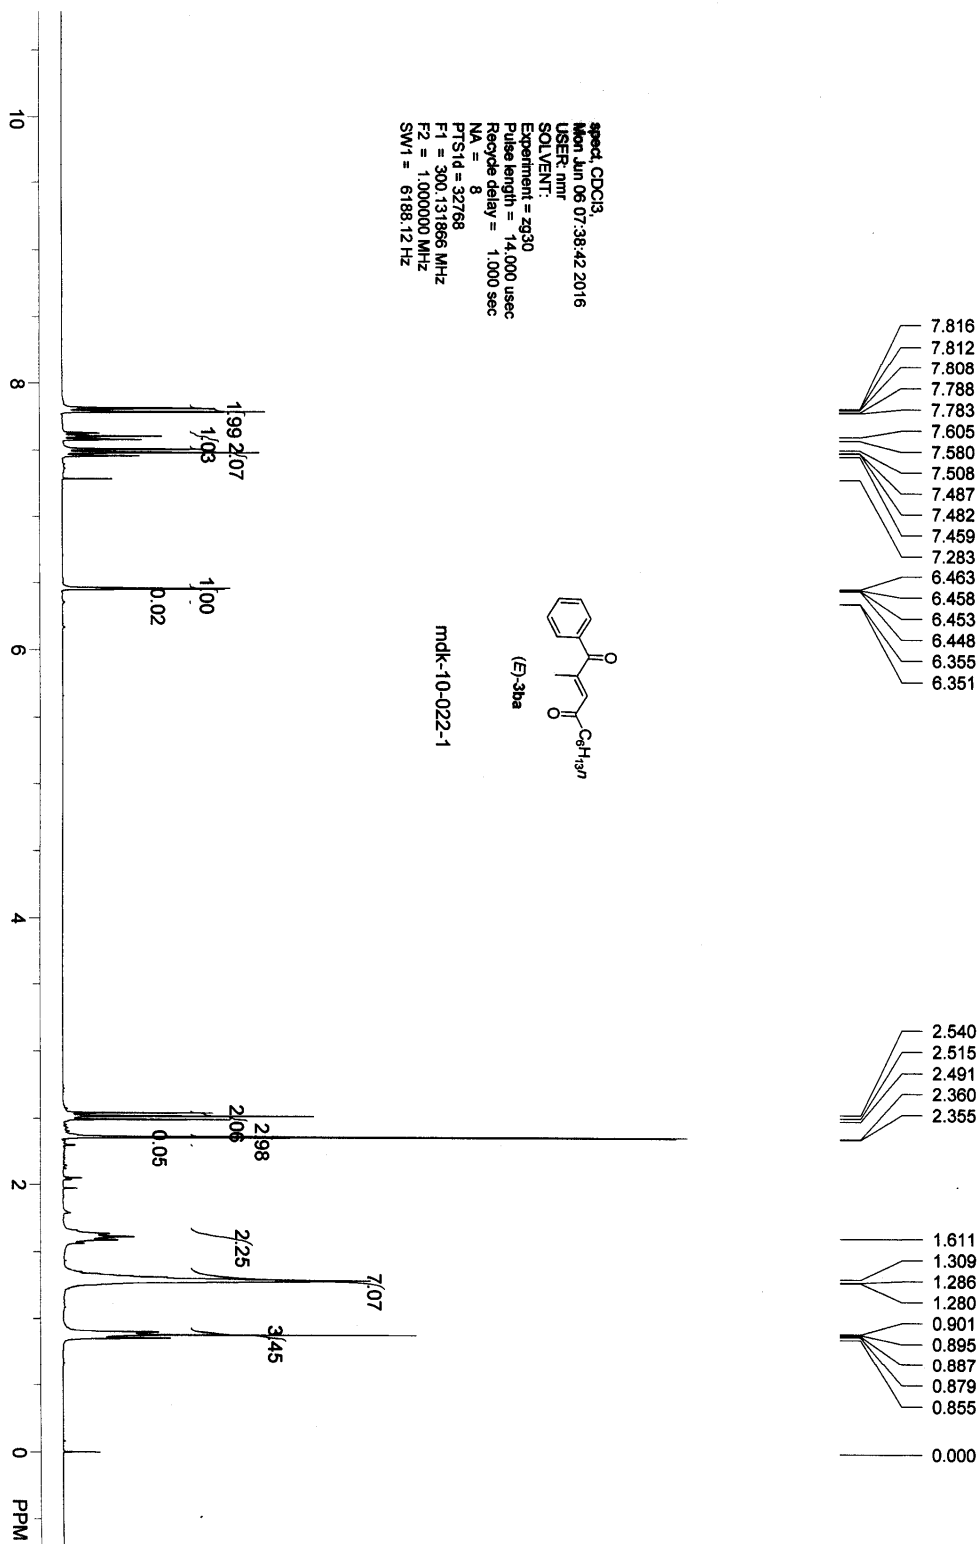

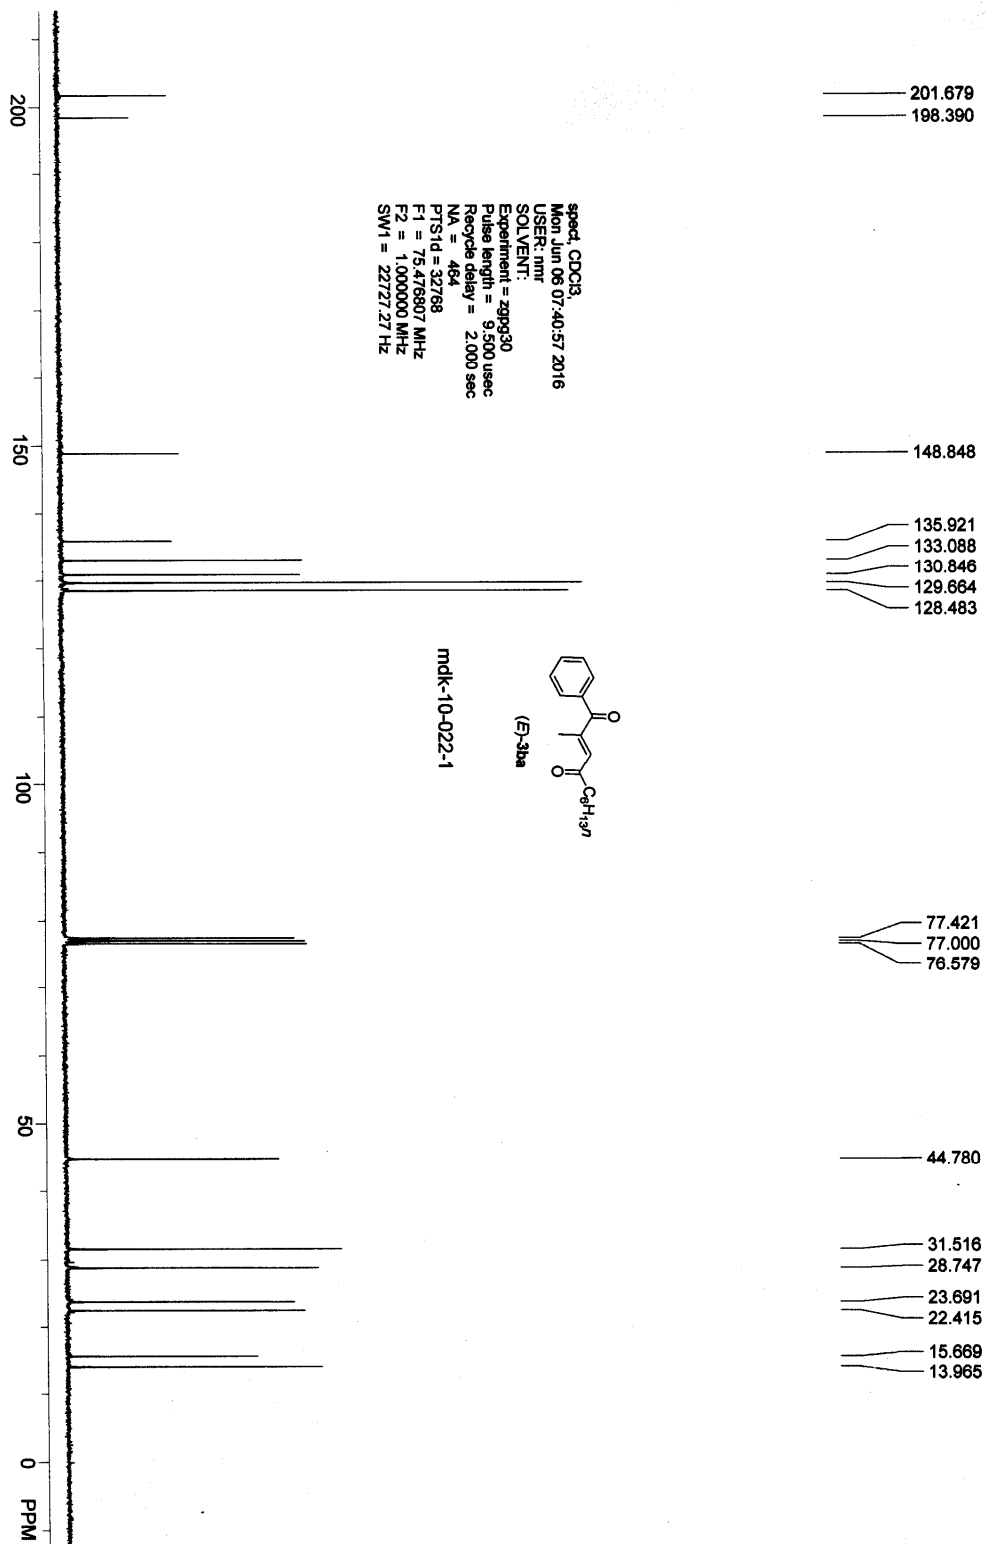

spec: CDCl3,  
Mon Jun 06 11:01:57 2016  
USER: nmf  
SOLVENT:  
Experiment = zg30  
Pulse length = 14,000 usec  
Recycle delay = 1,000 sec  
NA = 8  
PTS1d = 32768  
F1 = 300.131868 MHz  
F2 = 1,000,000 MHz  
SW1 = 6188.12 Hz  
48.0 mg sample in 14 uL CH2Br2  
as internal standard

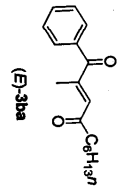

mdk-10-022-1-purity

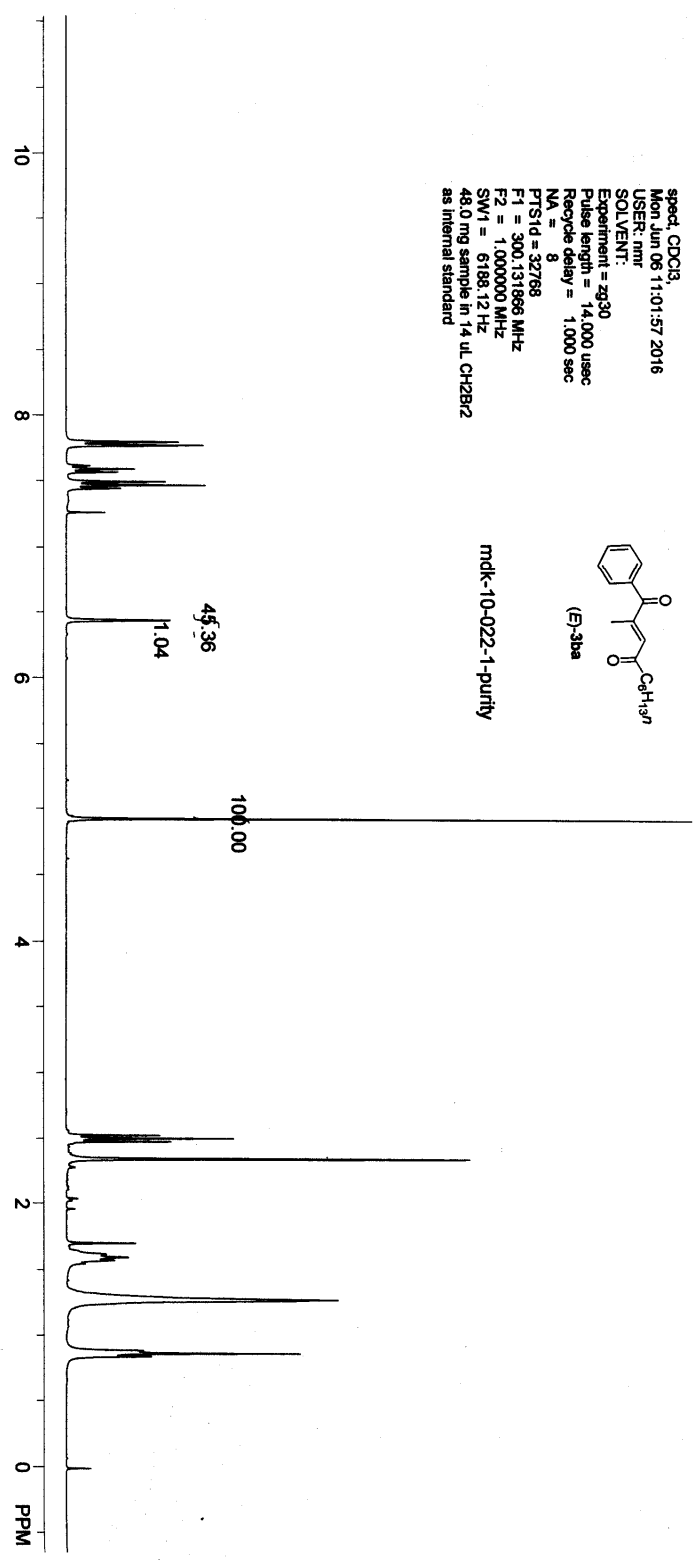

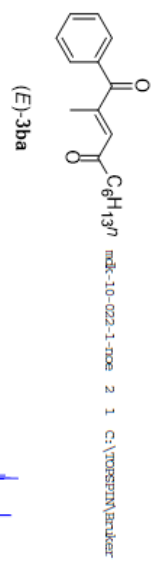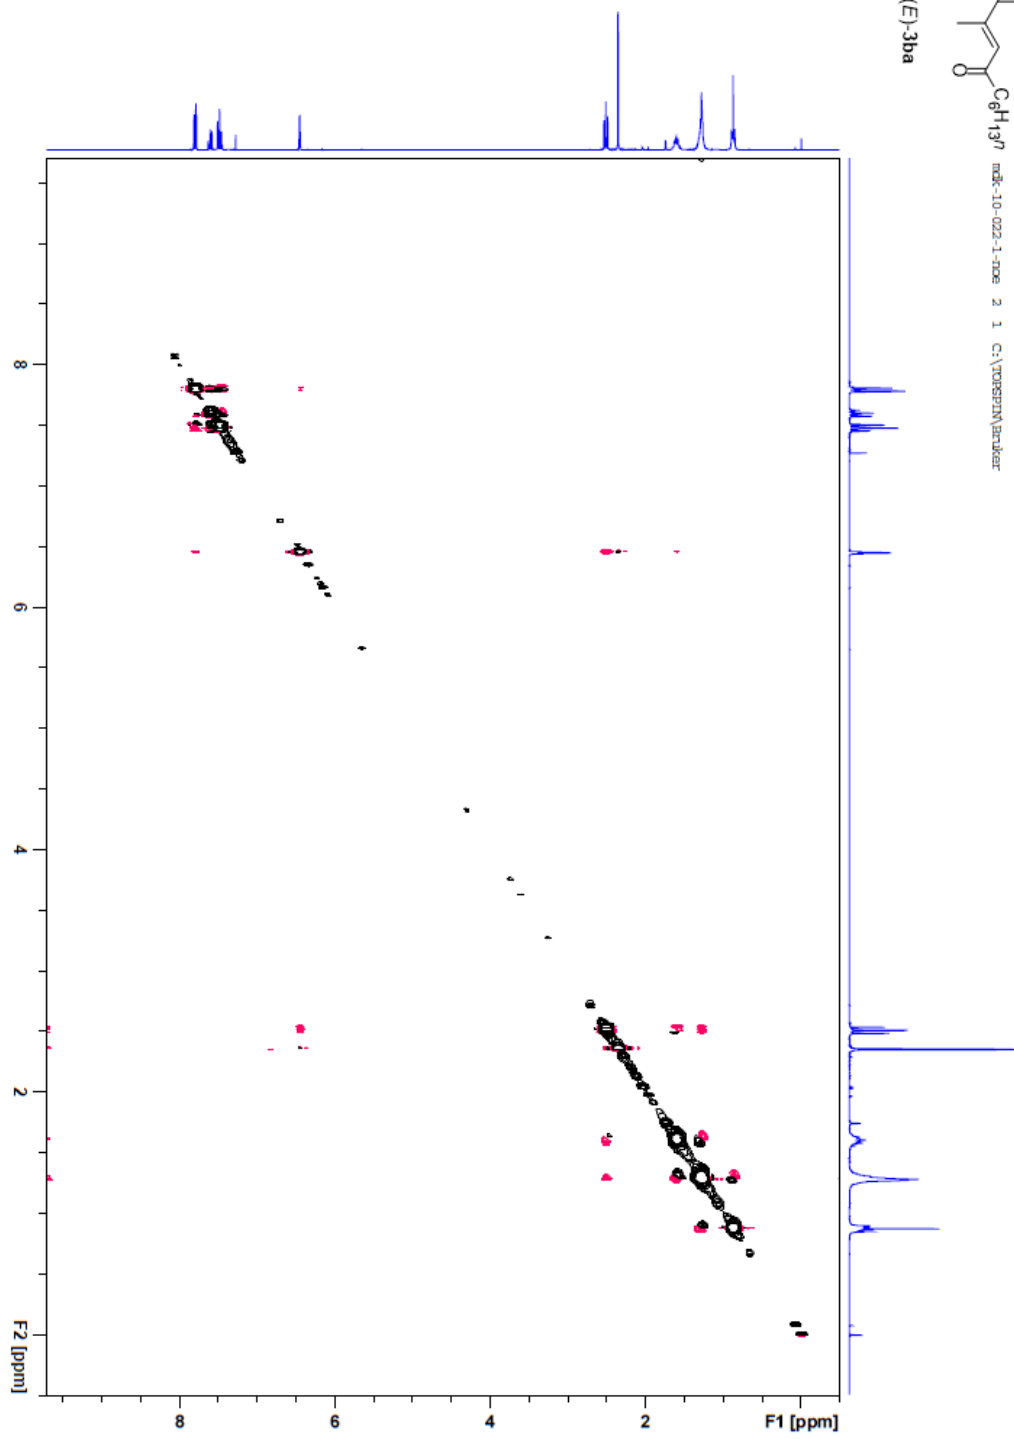



- 7.880
- 7.876
- 7.871
- 7.853
- 7.848
- 7.554
- 7.529
- 7.473
- 7.468
- 7.452
- 7.447
- 7.423
- 7.265
- 6.376
- 6.372
- 6.366
- 6.361

- 2.464
- 2.440
- 2.419
- 2.415
- 2.119
- 2.114
- 1.622
- 1.501
- 1.477
- 1.255
- 1.233
- 1.215
- 1.209
- 0.865
- 0.855
- 0.843
- 0.820
- 0.000

spect, CDCl3  
 Thu Jun 07 08:25:11 2016  
 USER: nmr  
 SOLVENT:  
 Experiment = zg30  
 Pulse length = 14.000 usec  
 Recycle delay = 1.000 sec  
 NA = 8  
 PTD14 = 32768  
 F1 = 300.131866 MHz  
 F2 = 1.000000 MHz  
 SW1 = 6188.12 Hz

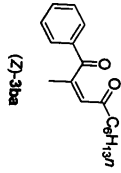

mdk-10-022-2

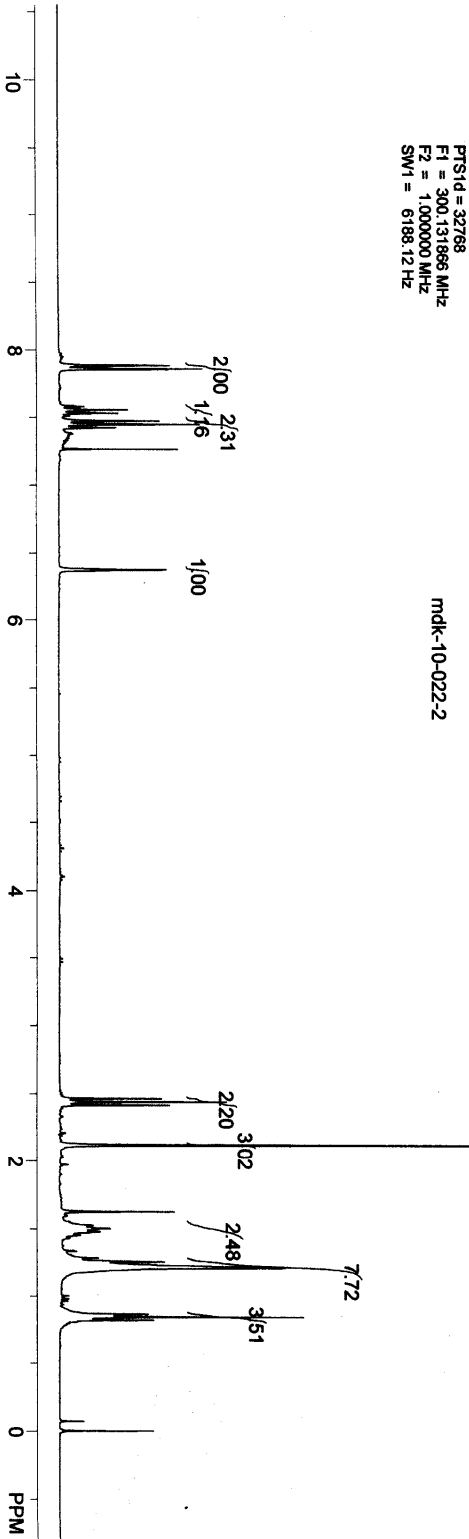

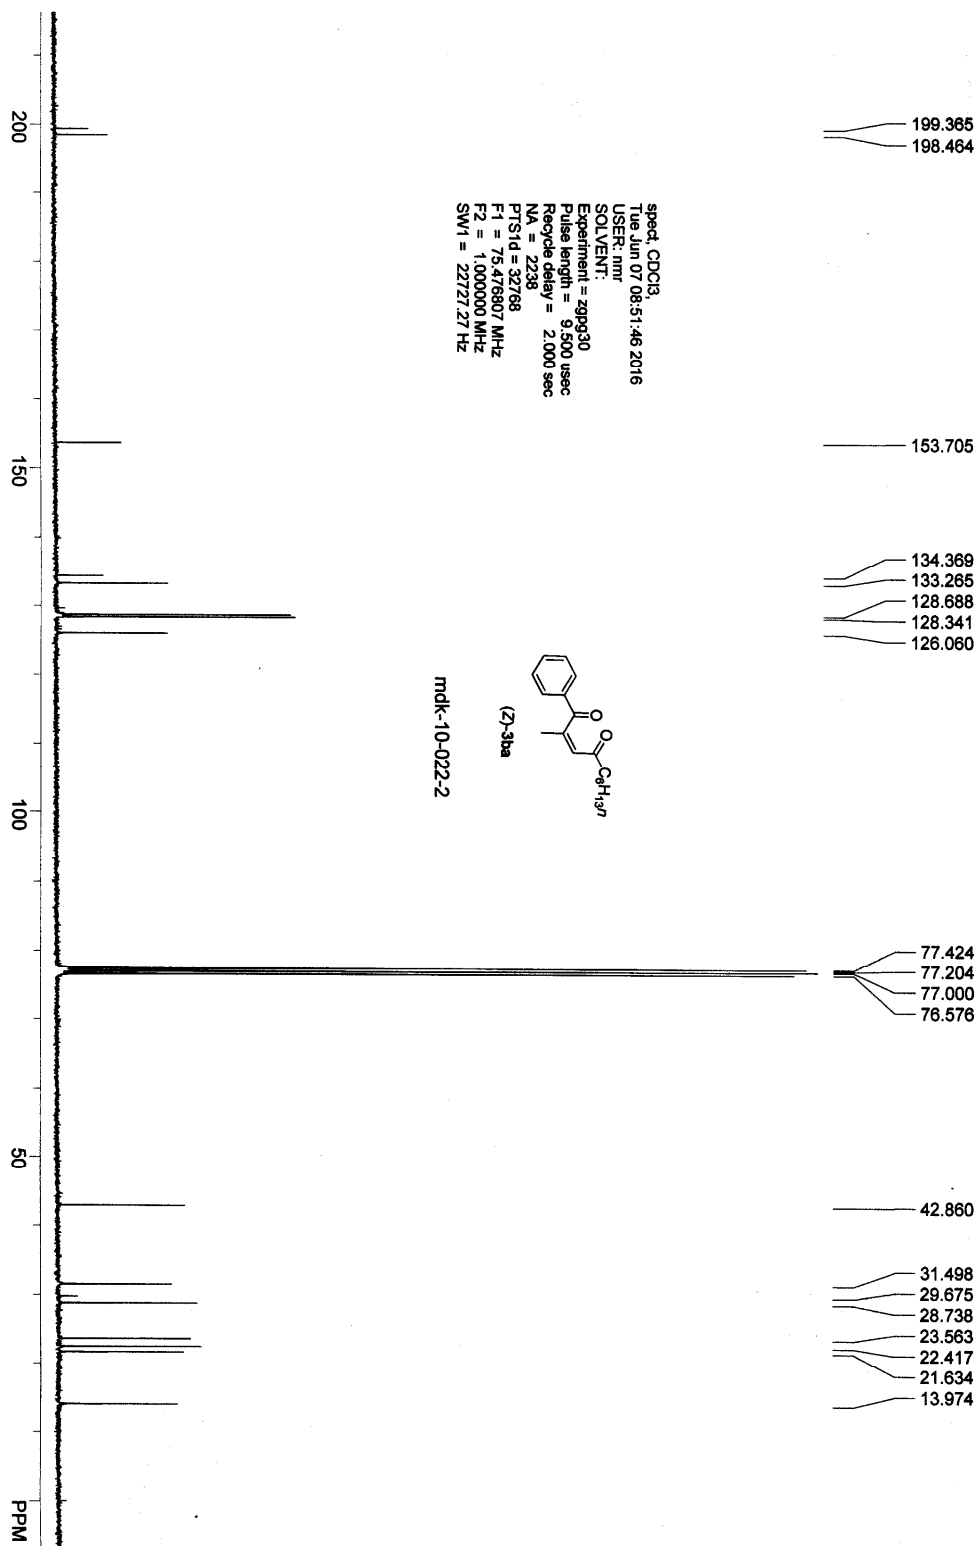

spect: CDCl3,  
 Wed Jun 08 01:10:39 2016  
 USER: nmr  
 SOLVENT:  
 Experiment = zg30  
 Pulse length = 14,000 usec  
 Recycle delay = 1,000 sec  
 NA = 8  
 P1 = 32768  
 P1S14 = 32768  
 F1 = 300,131866 MHz  
 F2 = 1,000000 MHz  
 SW1 = 6188.12 Hz  
 7 ul, CH2Br2 as internal standard  
 in 26.5 mg sample

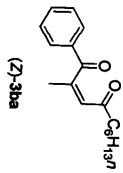

mdk-10-022-2-purity

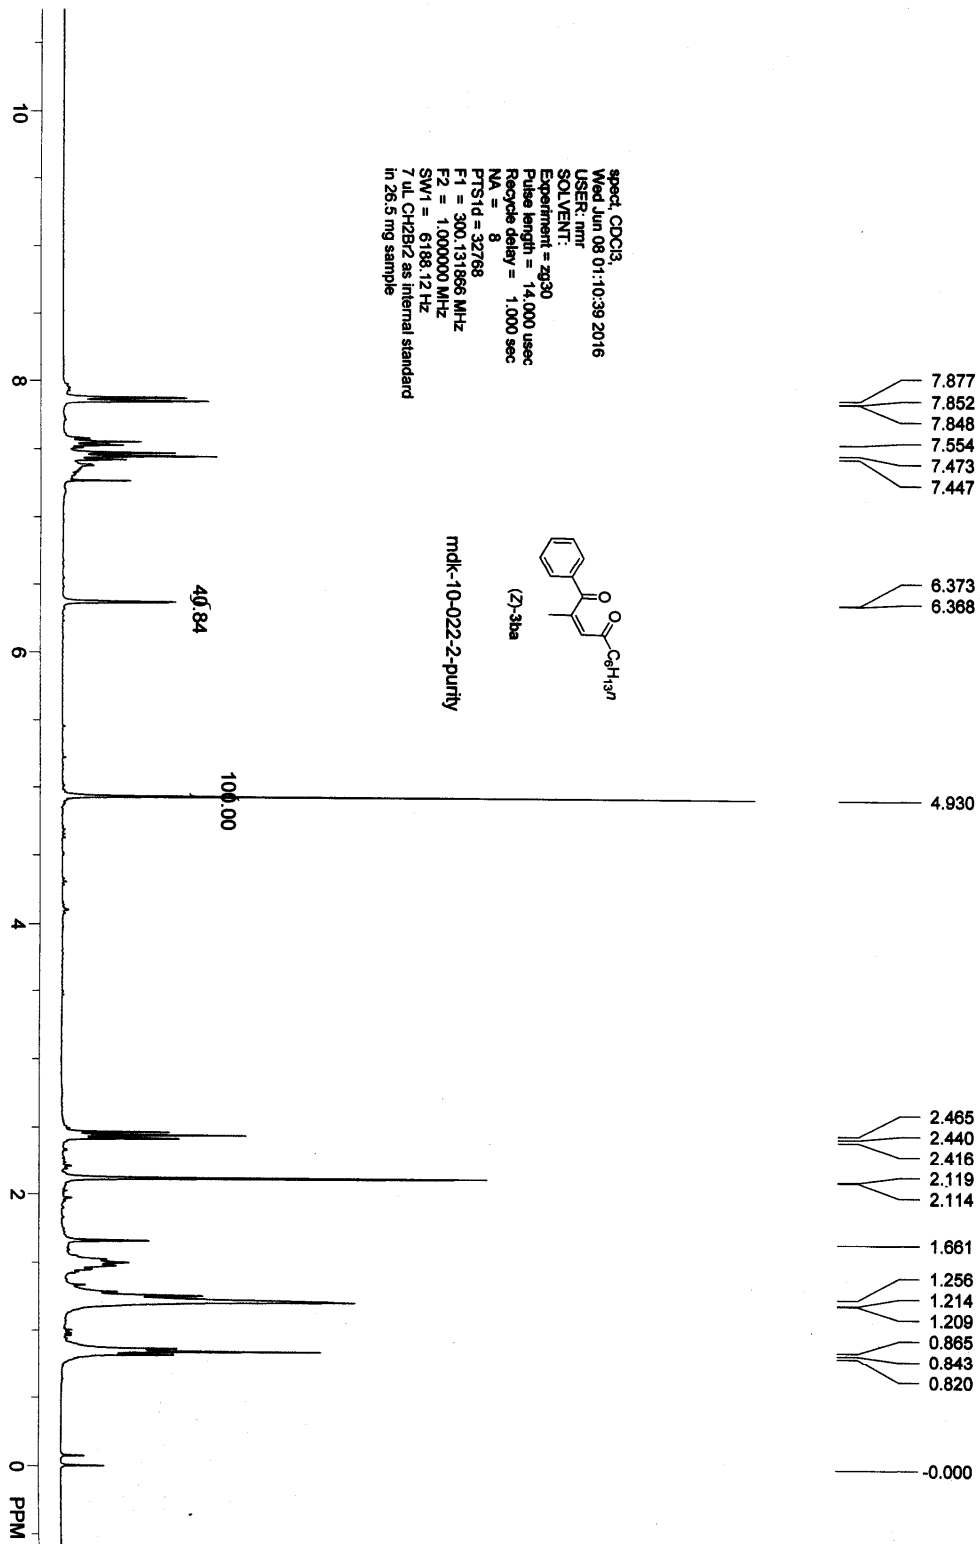

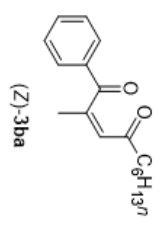

mdc-10-022-2-f002 2 1 C:\TOSPIN\Bender

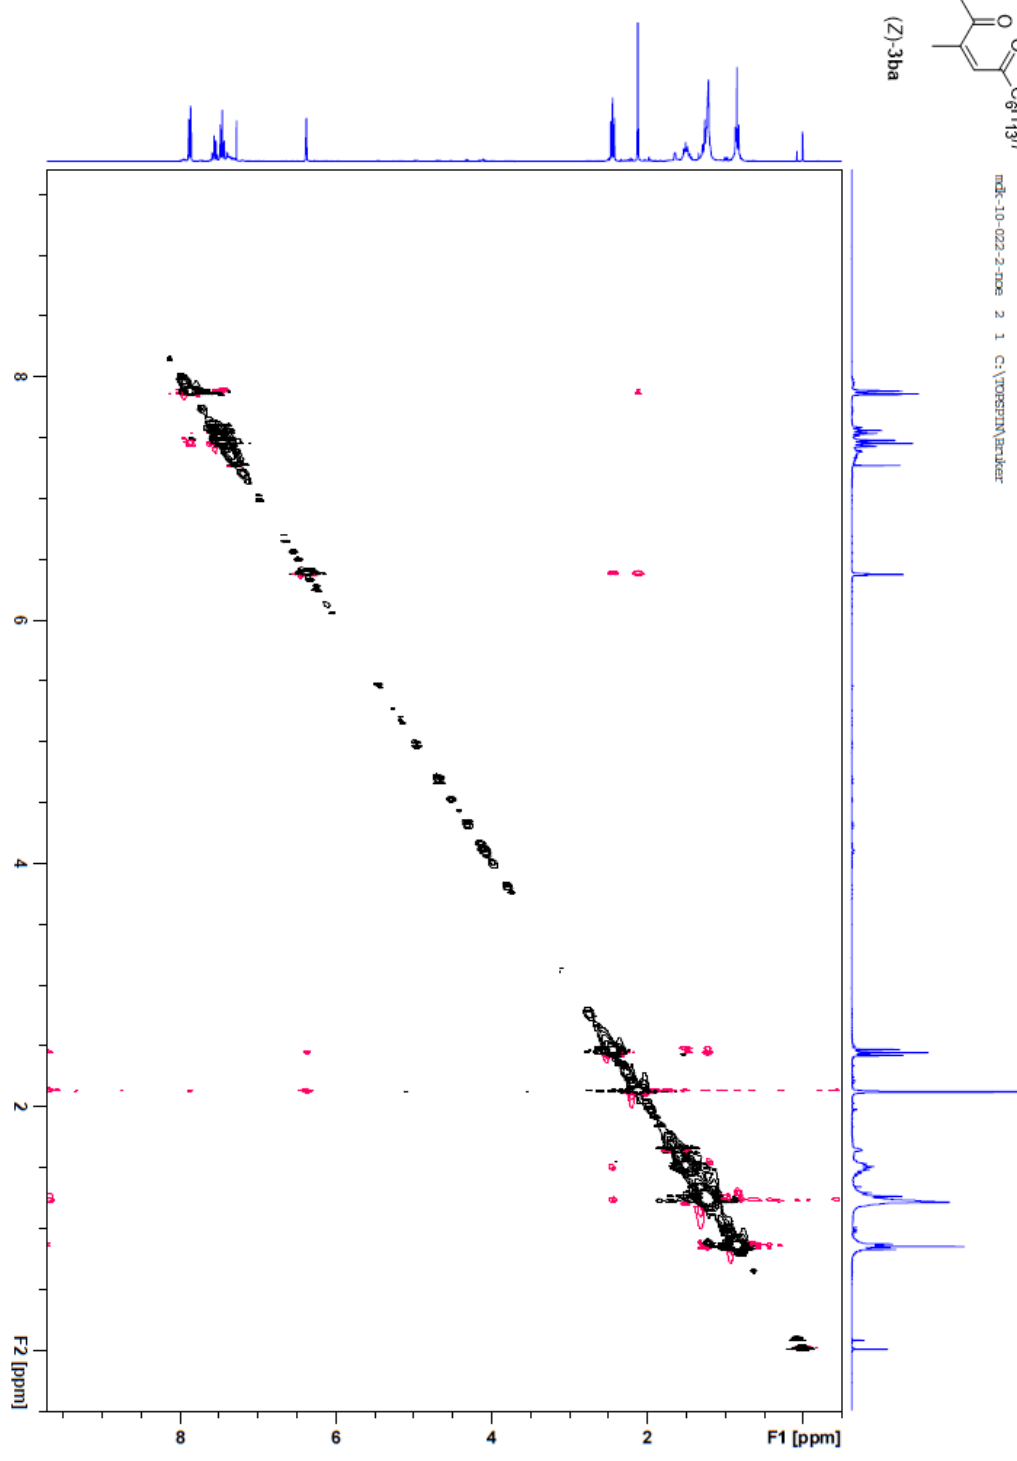

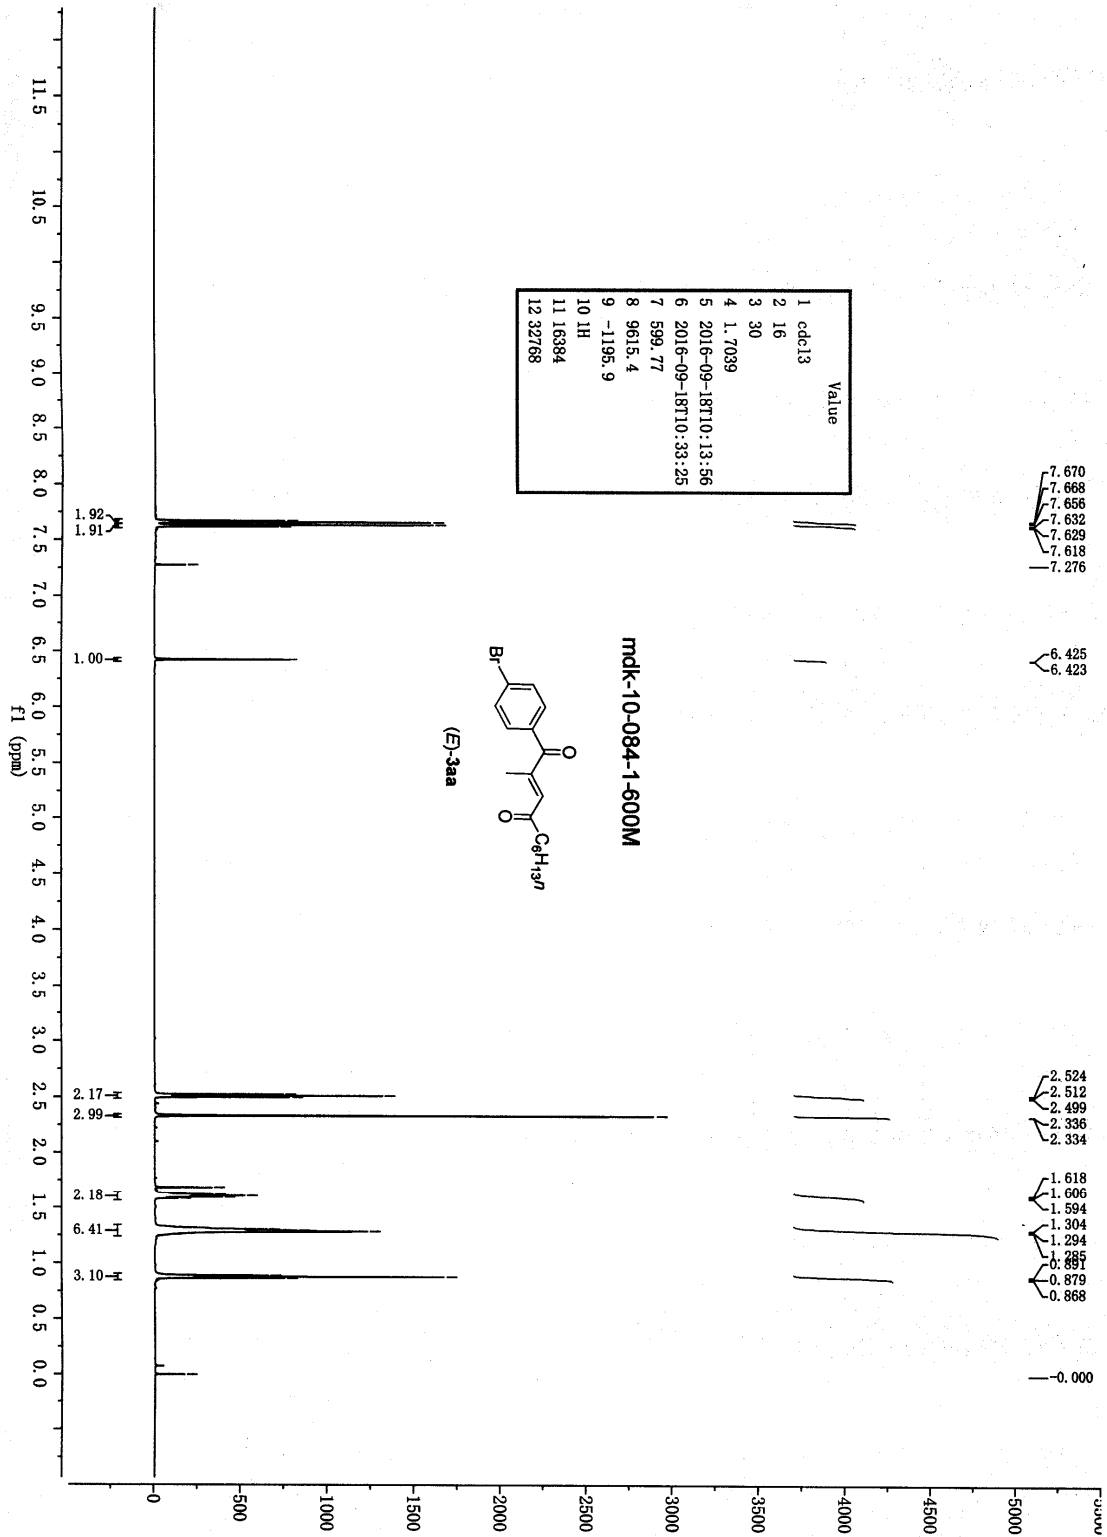

spect: CDCl3  
 Sun Sep 18 01:04:34 2016  
 USER: nmf  
 SOLVENT:  
 Experiment = zj30  
 Pulse length = 14,000 usec  
 Recycle delay = 1,000 sec  
 NA = 8  
 P1 = 300,131866 MHz  
 F2 = 1,000000 MHz  
 SW1 = 6188.12 Hz

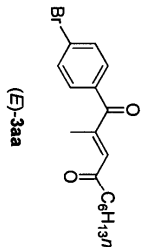

mdl-10-084-1-300M

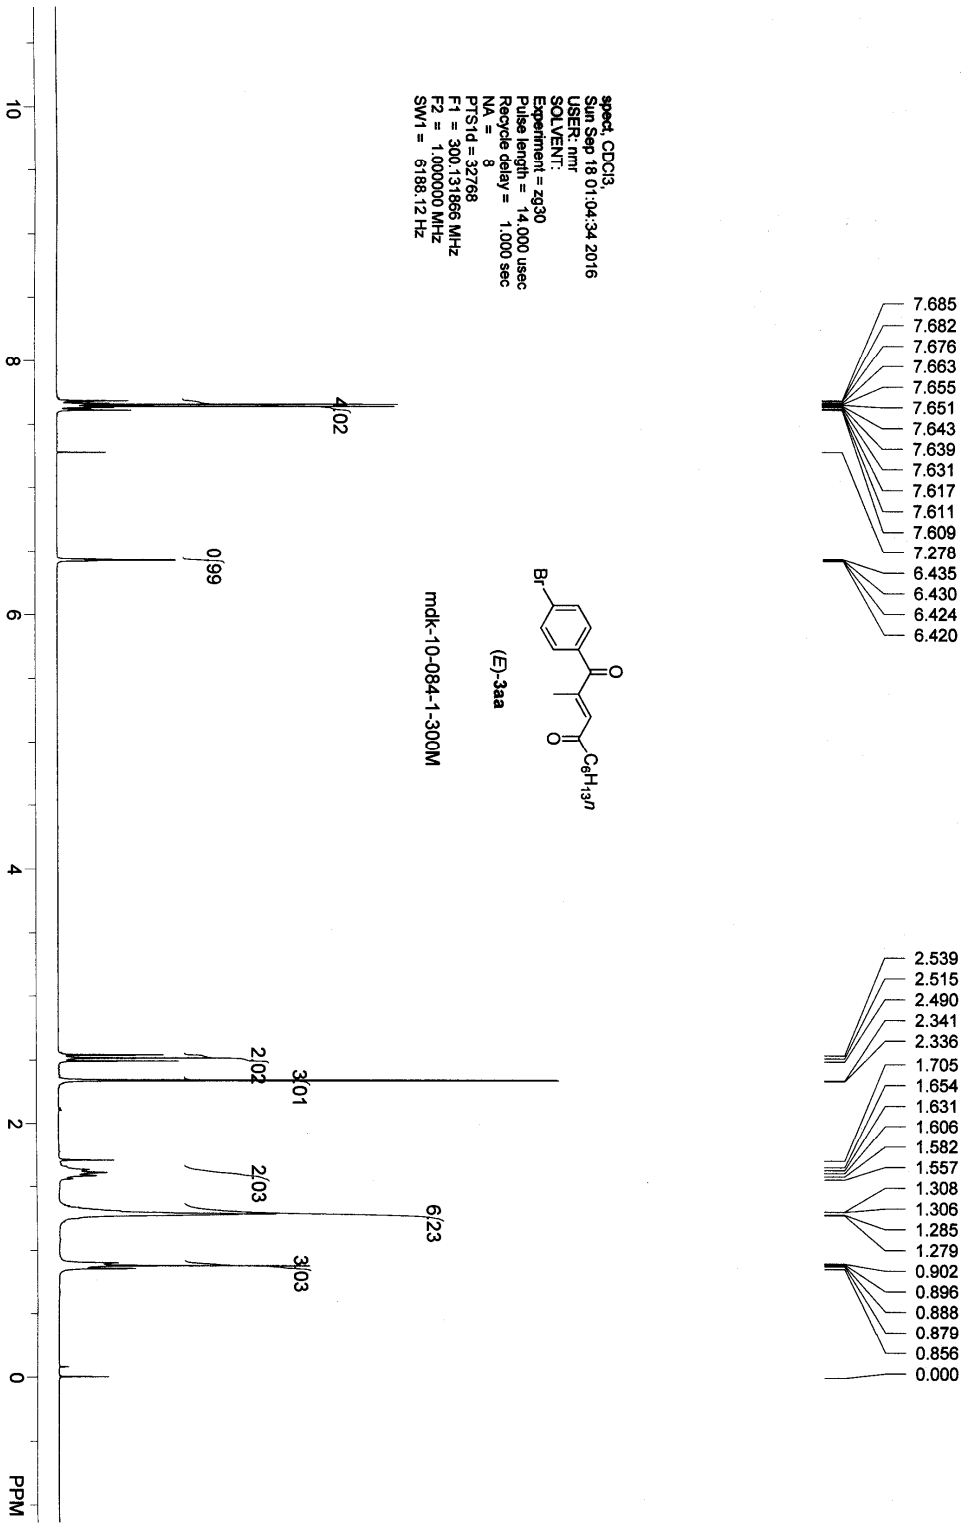

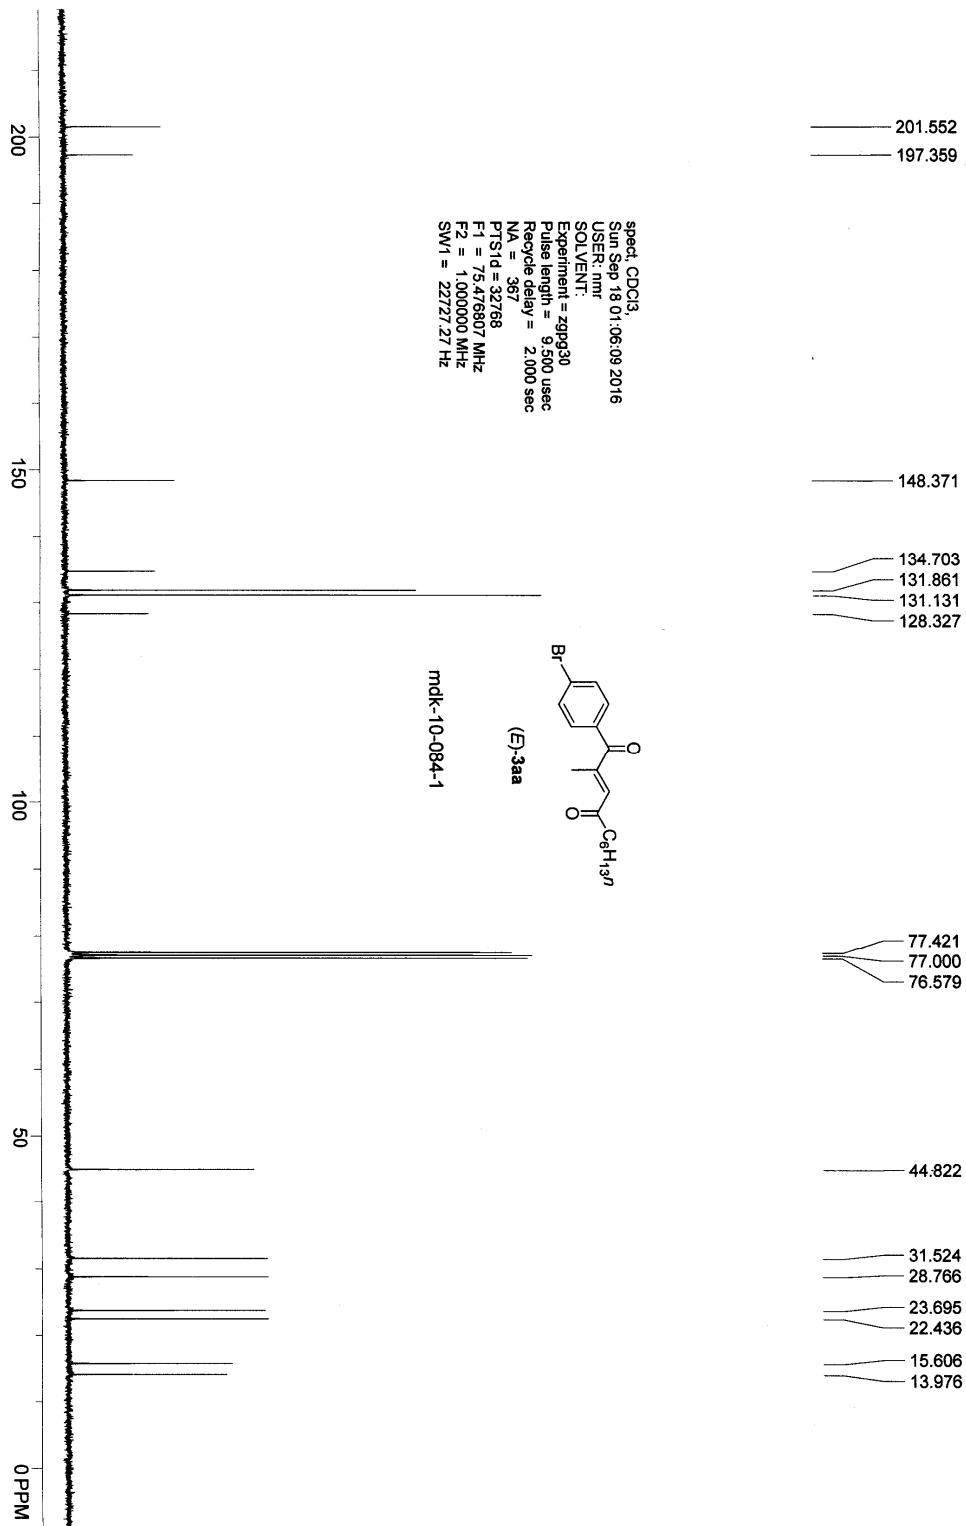

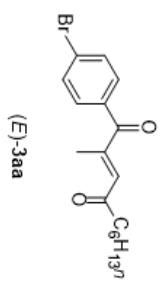

mdk-10-084-1-noe

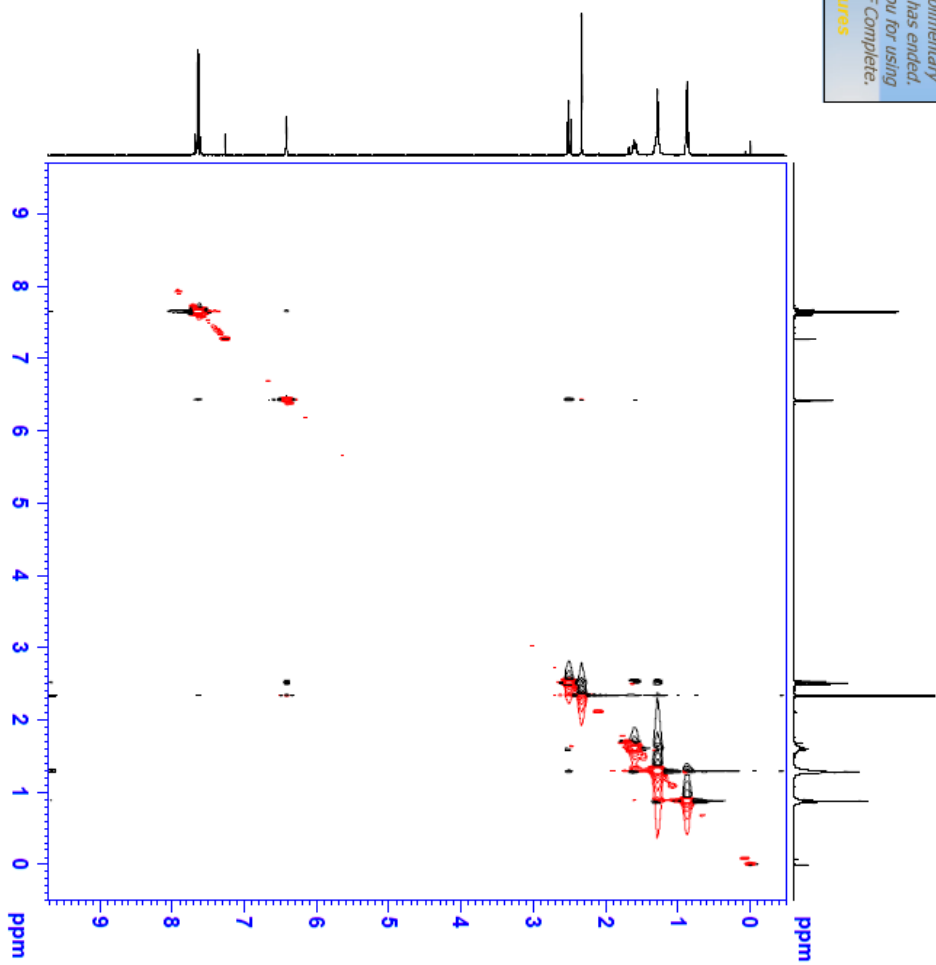



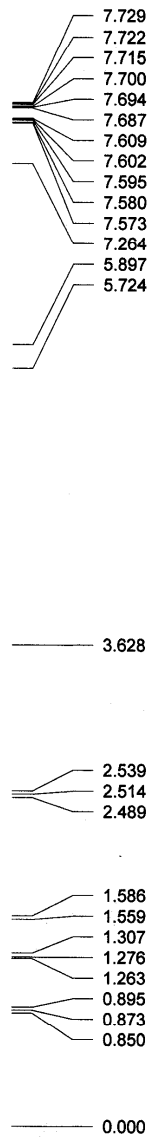

Spec1, CDCl3,  
Sun Sep 18 01:31:51 2016  
USER: nmr  
SOLVENT:

Experiment = zq30  
Pulse length = 14,000 usec  
Recycle delay = 1,000 sec  
NA = 16  
PTS1d = 32768  
F1 = 300.131866 MHz  
F2 = 1,000,000 MHz  
SMT = 6188.12 Hz

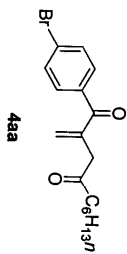

mdk-10-084-2

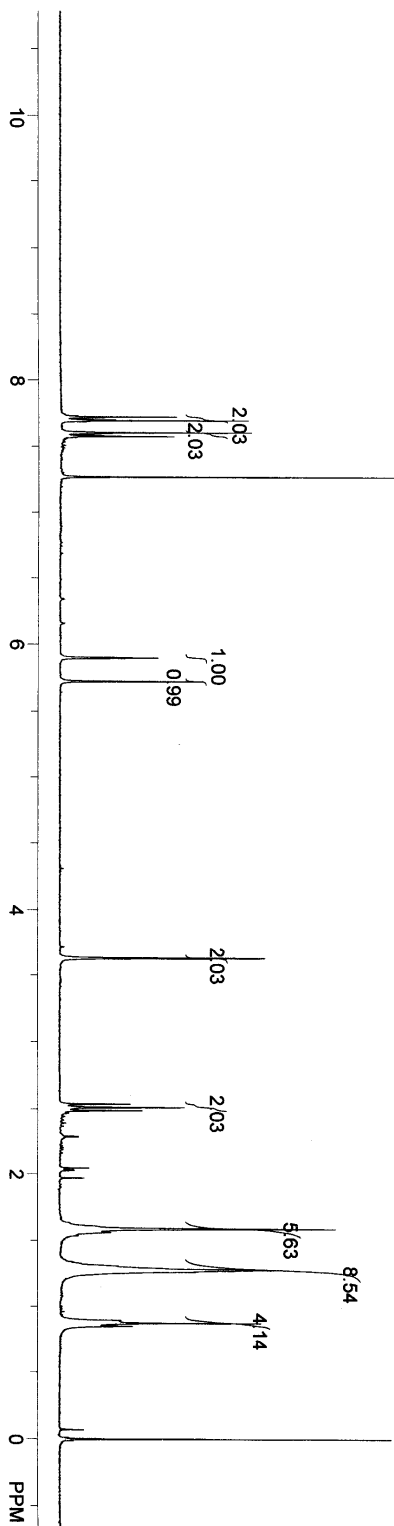

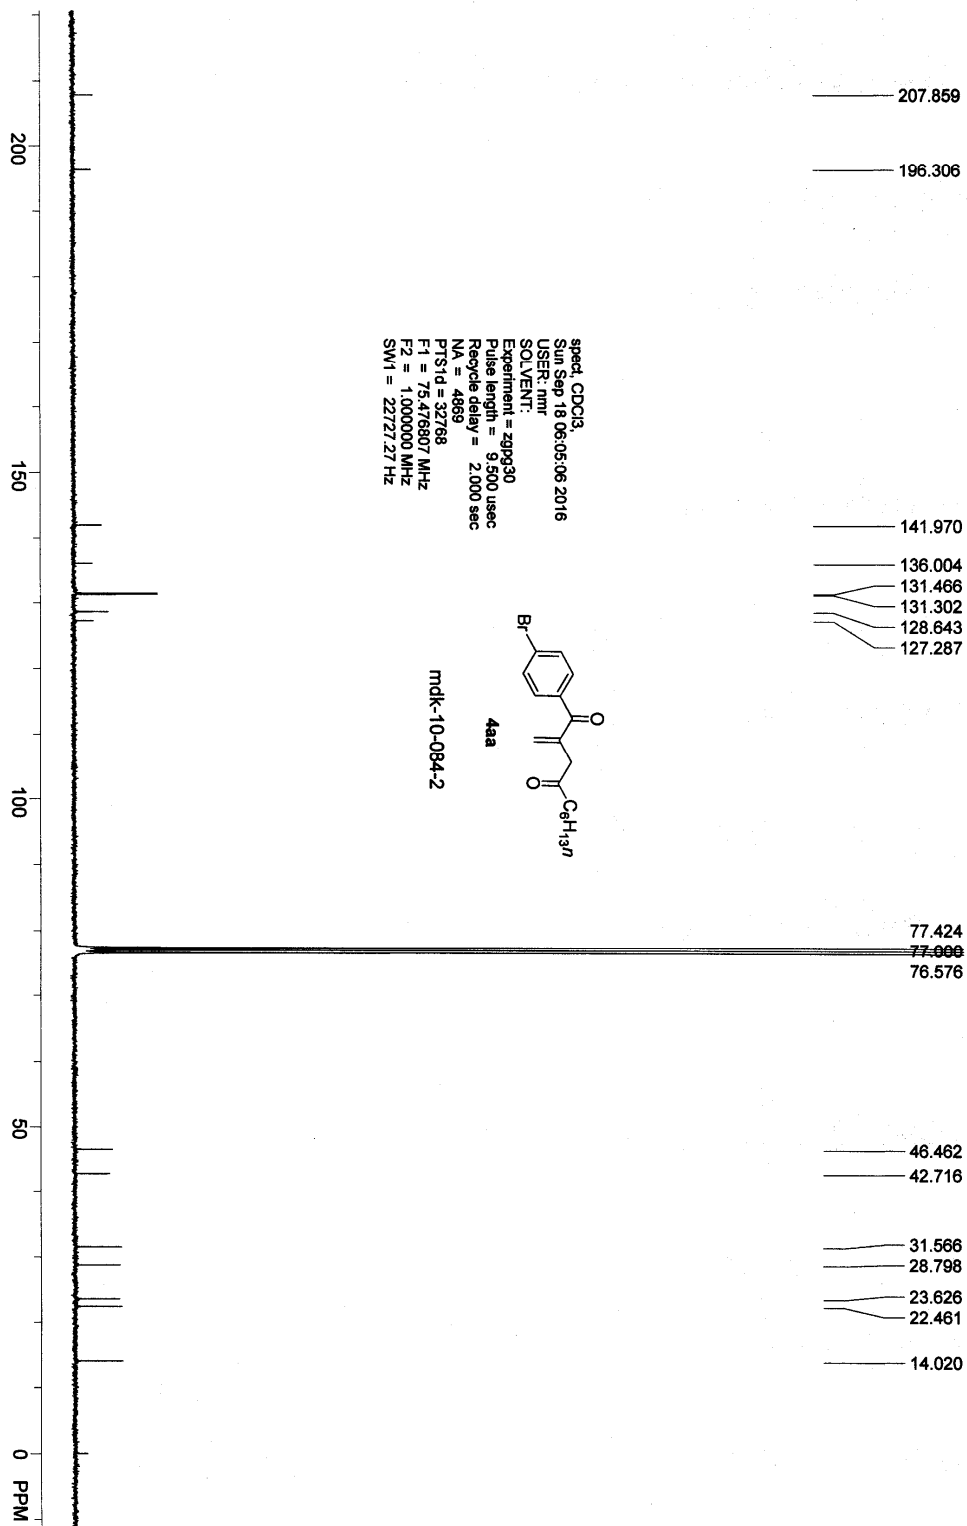

spect: CDCl3  
 Sun Sep 18 12:52:57 2016  
 USER: nmr  
 SOLVENT:  
 Experiment = zg30  
 Pulse length = 14.000 usec  
 Recycle delay = 1.000 sec  
 NA = 8  
 PTS1d = 32768  
 F1 = 300.131866 MHz  
 F2 = 1.000000 MHz  
 SW1 = 6188.12 Hz  
 7 uL CH2Br2 as internal standard  
 in 4.8 mg sample

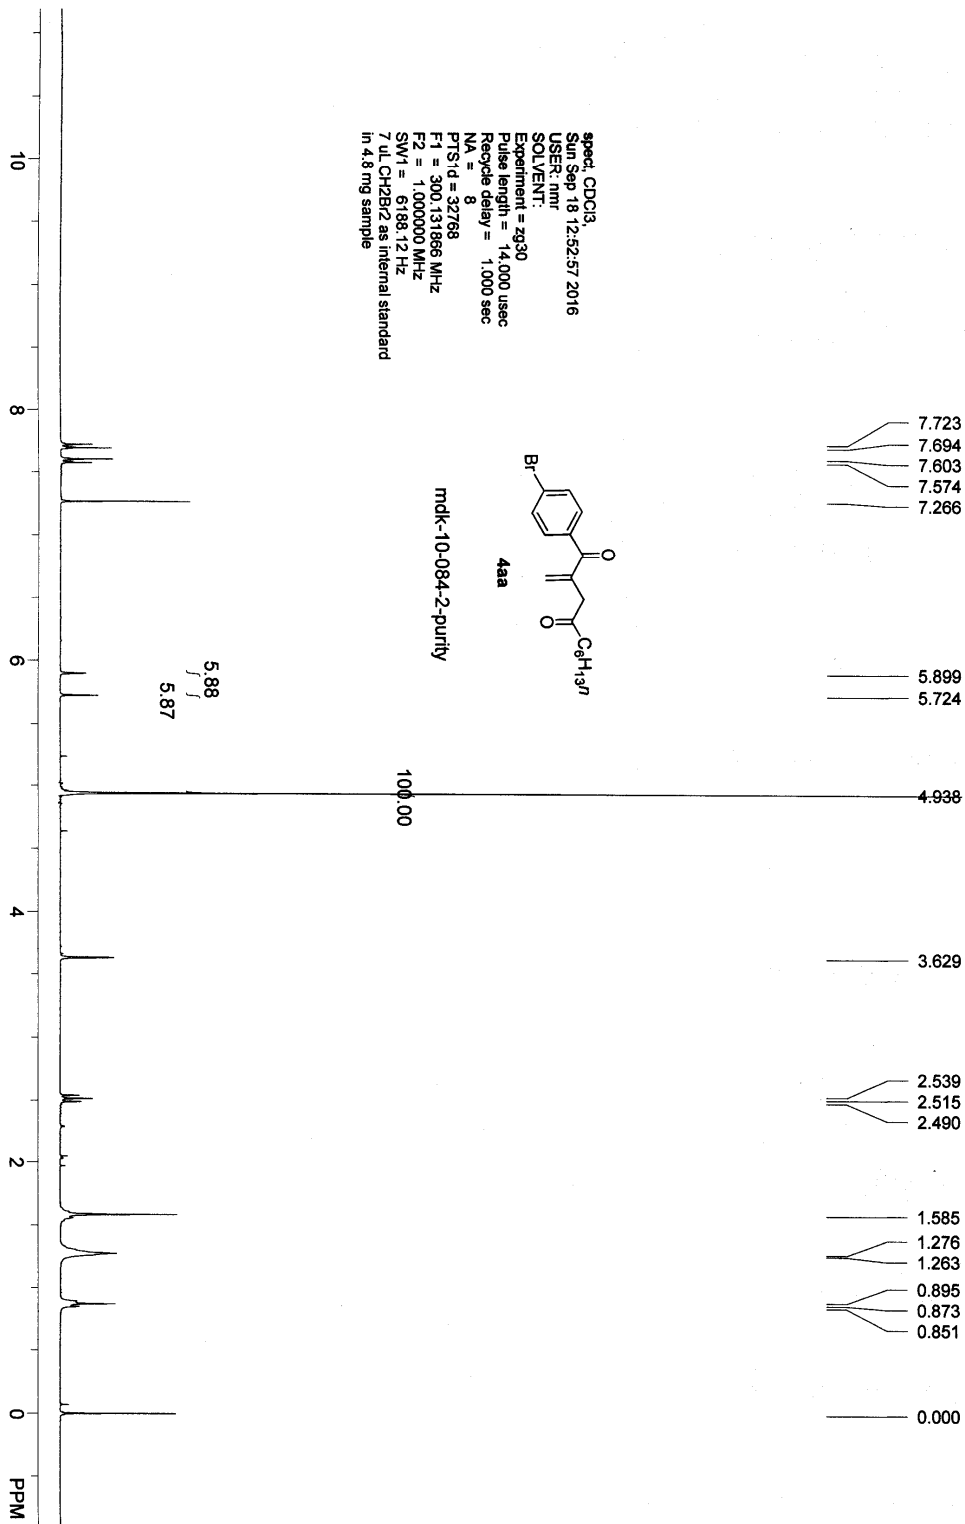

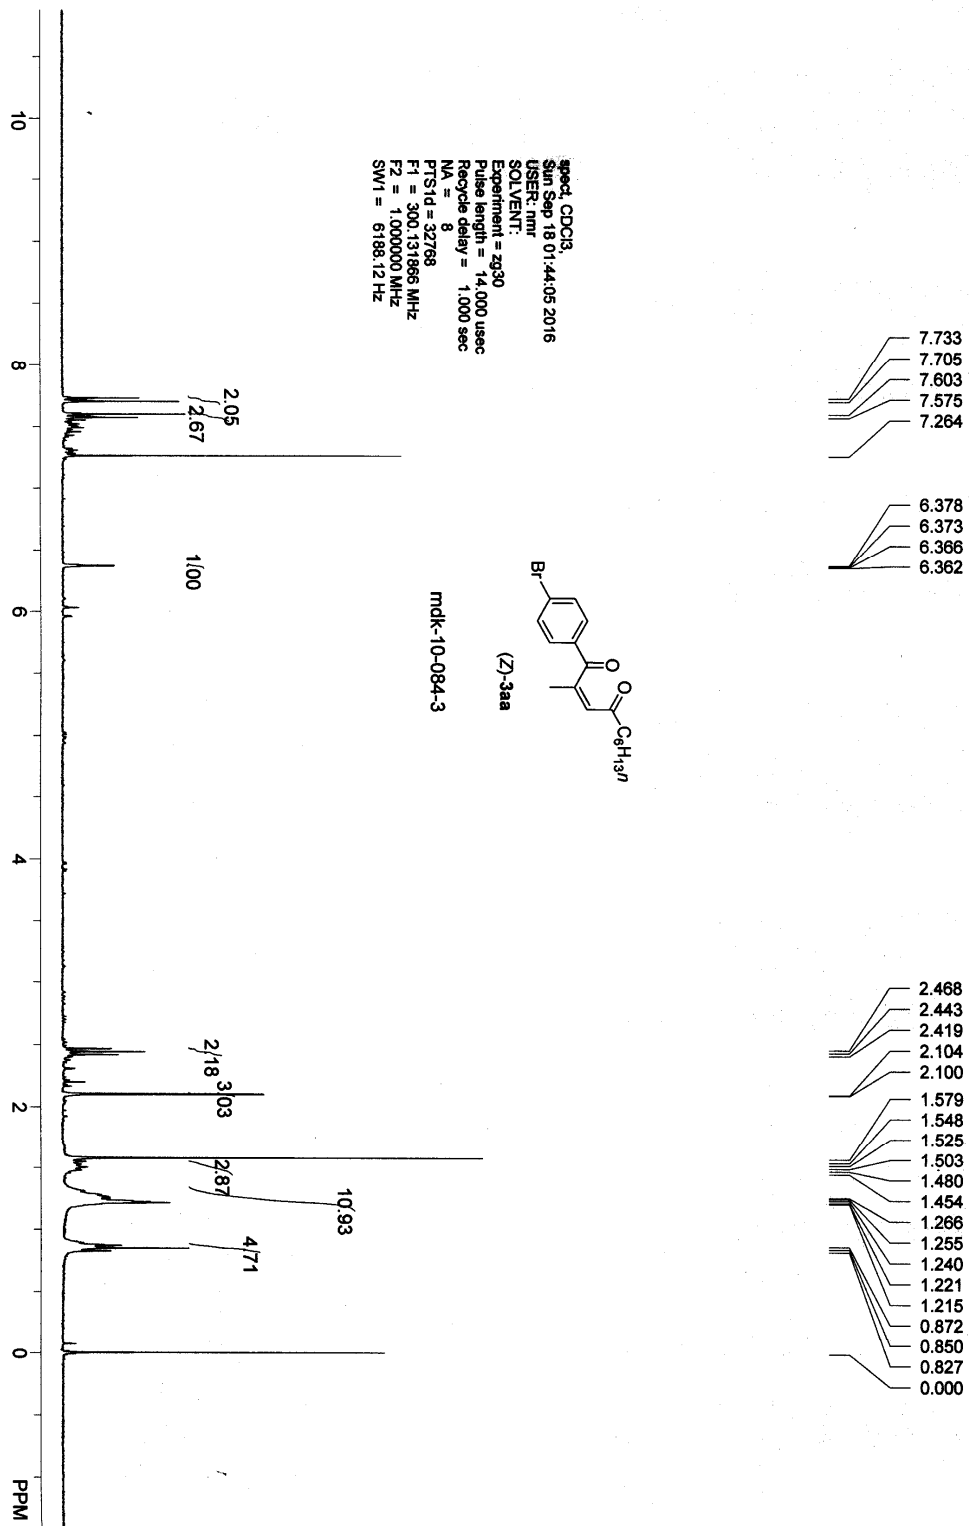

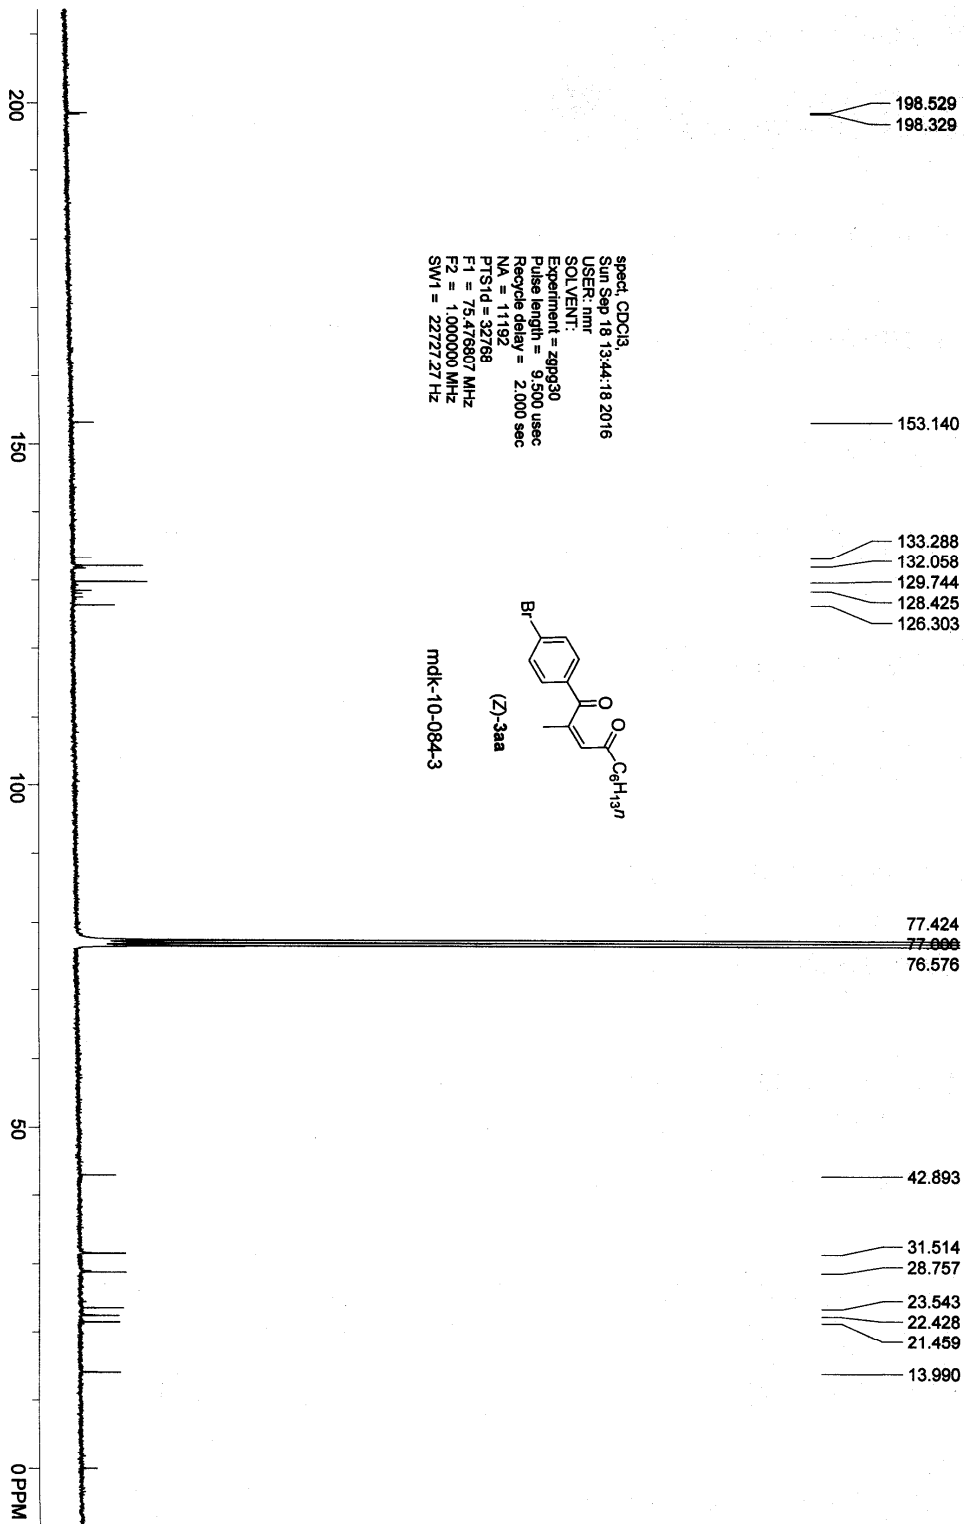

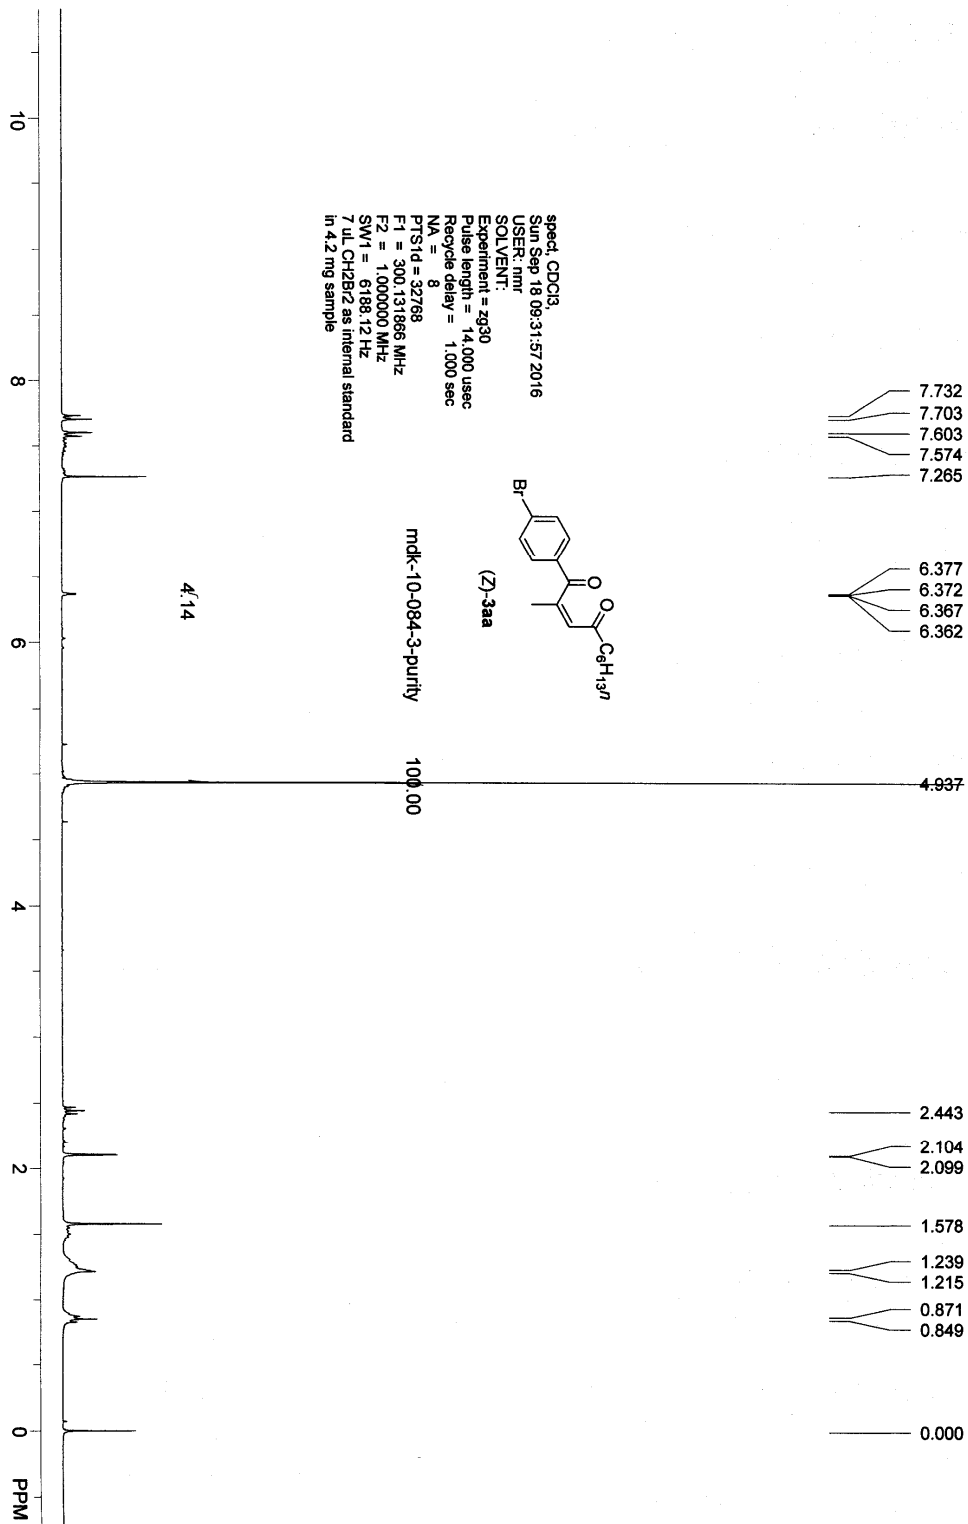

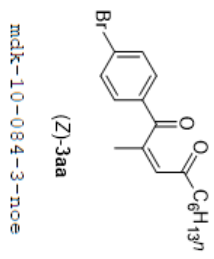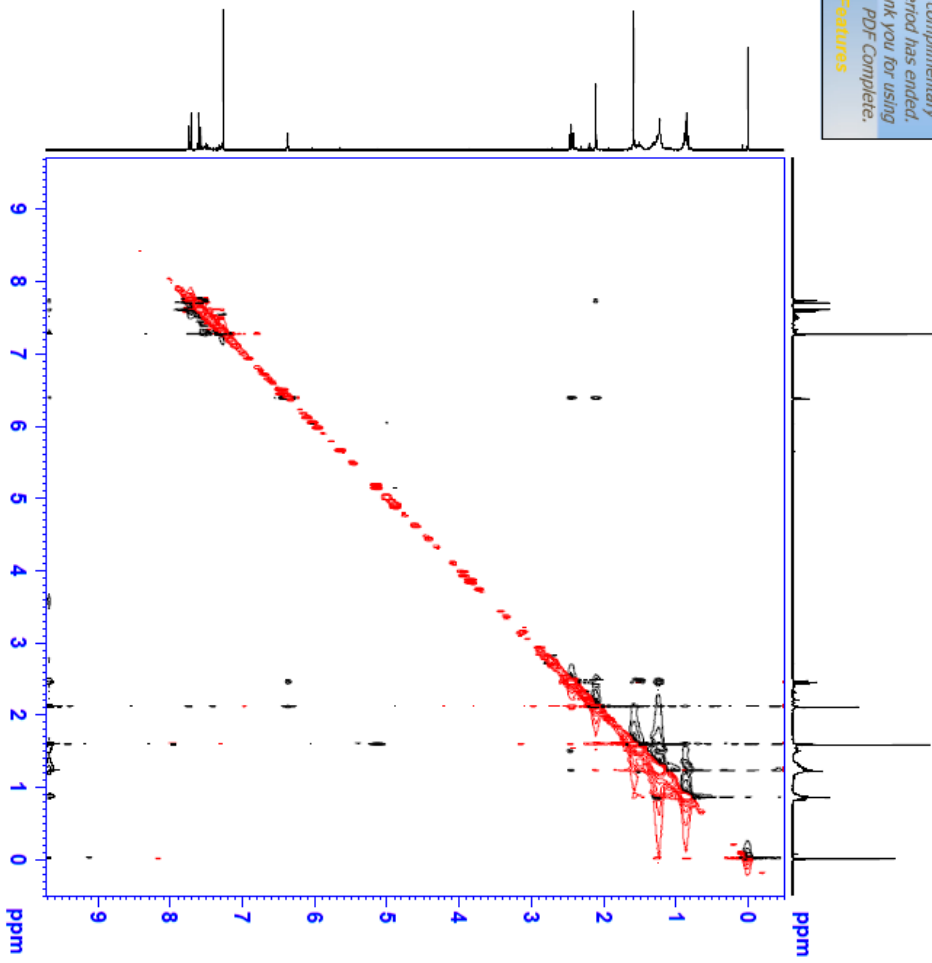

- 7.372
- 7.347
- 7.323
- 7.311
- 7.306
- 7.282
- 7.271
- 7.260
- 7.255
- 6.144
- 6.139
- 6.075
- 6.071

- 2.806
- 2.627
- 2.610
- 2.598
- 2.580
- 1.911
- 1.907
- 1.898
- 1.890
- 1.884
- 1.560
- 1.543
- 1.526
- 1.515
- 1.507
- 1.479
- 1.461
- 1.302
- 1.289
- 1.284
- 1.219
- 1.199
- 1.183
- 1.137
- 1.115
- 1.108
- 1.093
- 1.084
- 1.076
- 1.070
- 1.056
- 1.041
- 0.980
- 0.958
- 0.858
- 0.847
- 0.812
- 0.801
- 0.768
- 0.746
- 0.722
- 0.000

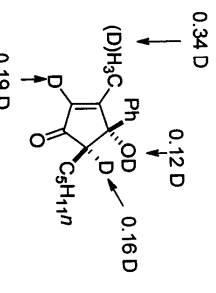

speed: CDCl3,  
Wed Oct 26 02:10:56 2016  
USER: nmr  
SOLVENT:  
Experiment = zg30  
Pulse length = 14.000 usec  
Recycle delay = 1.000 sec  
NA = 8  
PTSD = 32768  
F1 = 300.131866 MHz  
F2 = 100.000000 MHz  
SWH = 6188.12 Hz

mdk-10-125  
dr (4R\*,5R\*-5ba-D:4R\*,5S\*-5ba-D) = 99:1

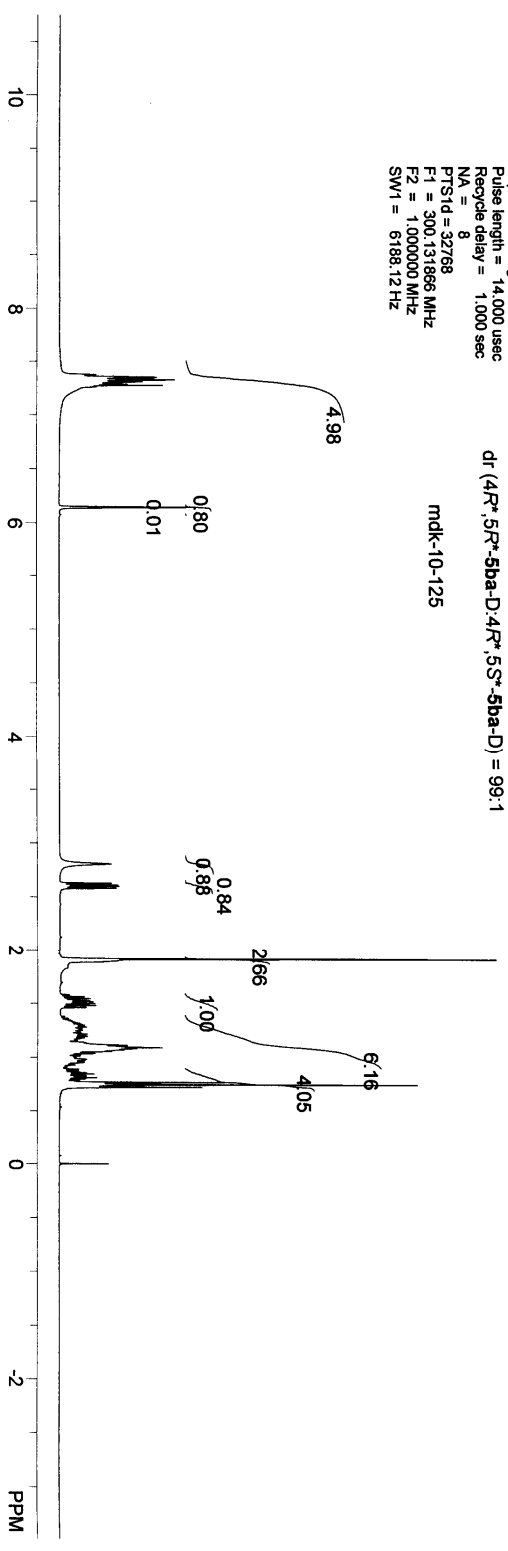



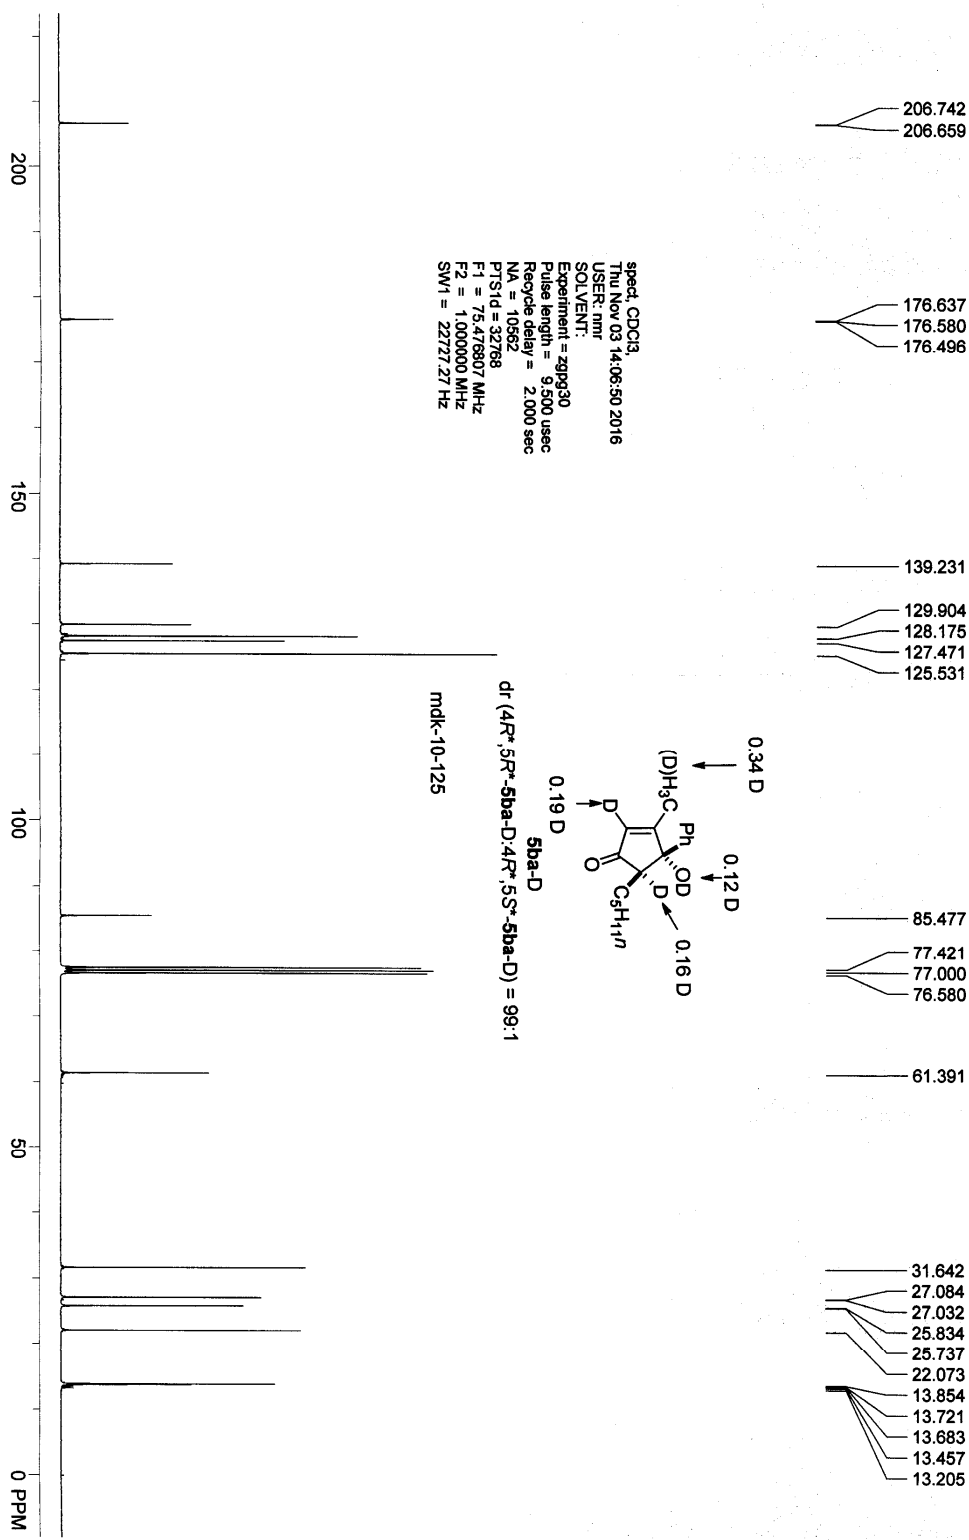

Supplement: c6cc07974a1.pdf [file c6cc07974a1.pdf]
